# Supplementary material
Source: publisher figshare collection journal article supplement (https://tandf.figshare.com/articles/dataset/_/7505252)
Supplement: Supplementary file 1 [file 1]

## Sheet: genotype_ABH
Table S7. Allele calls for 113 RILs from the cross of RTx430 with Sureno.
Marker	Chromosome	Position (bp)	RIL017	RIL018	RIL020	RIL022	RIL023	RIL025	RIL026	RIL027	RIL028	RIL029	RIL030	RIL031	RIL032	RIL033	RIL034	RIL035	RIL036	RIL037	RIL038	RIL039	RIL040	RIL041	RIL042	RIL043	RIL044	RIL045	RIL046	RIL047	RIL048	RIL049	RIL050	RIL051	RIL053	RIL054	RIL055	RIL056	RIL057	RIL058	RIL059	RIL060	RIL061	RIL062	RIL063	RIL064	RIL065	RIL066	RIL067
chr1_16677170	chr1	16677170	B	A	A	B	A	B	B	B	B	A	A	B	A	B	A	A	B	A	B	B	B	B	B	A	B	A	B	B	B	B	B	B	B	A	B	A	A	B	A	A	A	B	B	A	B	B	B
chr1_17169314	chr1	17169314	B	A	A	B	A	B	B	B	*	A	A	*	A	H	A	A	B	A	B	B	B	B	B	A	B	A	B	B	H	B	B	B	B	A	A	A	A	B	A	A	A	B	B	A	*	B	B
chr1_20134904	chr1	20134904	B	A	A	B	B	B	B	A	B	A	B	B	B	A	A	A	A	B	A	B	B	B	A	B	B	A	B	B	A	A	A	B	B	A	B	A	B	B	B	B	A	B	B	A	B	B	A
chr1_44178045	chr1	44178045	B	A	A	H	B	A	B	A	B	A	A	B	B	A	A	B	B	A	A	B	B	B	A	A	B	A	A	B	H	A	A	B	B	A	H	A	B	H	B	B	A	A	B	A	B	A	A
chr1_52164652	chr1	52164652	B	B	A	B	B	A	B	A	A	A	A	A	B	H	B	B	A	A	A	B	B	B	A	A	A	A	B	A	B	A	B	B	B	A	B	B	A	A	B	A	A	A	B	A	A	A	A
chr1_53393185	chr1	53393185	B	B	A	B	B	A	B	A	B	A	A	A	B	A	B	B	A	B	A	B	A	B	A	A	A	B	B	A	B	A	B	B	B	A	B	B	A	A	B	B	A	H	B	A	B	A	A
chr1_53620889	chr1	53620889	B	B	A	B	B	A	B	A	B	A	A	A	B	A	B	B	A	B	A	B	A	B	A	A	A	B	B	A	B	A	B	B	B	A	B	B	A	A	B	B	A	H	B	A	B	A	A
chr1_53699219	chr1	53699219	B	B	A	B	B	A	B	A	*	A	A	*	B	A	B	B	A	B	A	B	A	B	A	A	A	*	B	A	B	A	B	B	B	A	B	B	A	A	B	A	A	A	B	A	*	A	A
chr1_54706017	chr1	54706017	B	A	A	B	A	A	B	A	A	H	A	A	A	A	B	A	A	B	A	B	A	B	A	B	A	A	B	B	B	A	B	B	B	A	B	B	A	A	B	A	H	A	B	A	A	B	A
chr1_55334616	chr1	55334616	B	A	A	H	A	A	B	A	A	A	A	B	A	A	B	A	B	B	A	A	A	B	B	A	A	A	B	B	B	A	B	B	B	A	B	B	A	A	B	A	B	A	H	A	B	B	A
chr1_55310495	chr1	55310495	B	A	A	B	A	A	B	A	A	A	A	B	A	A	B	A	B	B	A	A	A	B	B	A	A	A	B	B	B	H	B	B	B	A	B	B	A	A	B	A	B	A	H	A	A	B	A
chr1_55501172	chr1	55501172	B	A	A	H	A	A	B	A	A	A	A	B	A	B	B	A	B	B	A	A	A	B	B	A	A	A	B	B	B	A	B	B	B	A	B	B	A	A	B	A	B	A	H	A	*	B	A
chr1_55946761	chr1	55946761	B	A	A	B	A	A	B	A	A	A	A	B	A	A	B	A	B	B	A	A	A	B	B	A	A	H	B	B	B	H	B	B	B	A	B	B	A	A	B	A	B	A	A	A	B	B	A
chr1_55922650	chr1	55922650	B	A	A	H	A	A	H	A	A	A	A	B	A	A	B	A	B	B	A	A	A	B	B	A	A	H	B	B	B	A	B	B	B	A	B	B	A	A	B	A	B	A	A	A	*	B	A
chr1_56202921	chr1	56202921	B	A	A	H	A	A	B	A	A	A	A	B	A	A	B	A	B	B	A	A	A	B	B	A	A	H	B	B	B	A	B	B	B	A	B	B	A	A	B	A	B	A	A	A	*	B	A
chr1_56235854	chr1	56235854	B	A	A	H	A	A	B	A	A	A	A	B	A	A	B	A	*	B	A	A	A	B	B	A	A	H	B	B	H	A	B	B	B	A	B	B	A	A	B	A	B	A	A	A	B	B	A
chr1_56252115	chr1	56252115	B	A	A	B	A	B	B	A	A	A	A	B	A	A	B	A	B	B	A	A	A	B	B	A	A	A	B	B	B	A	B	B	B	A	B	B	A	A	B	A	B	A	A	A	*	B	A
chr1_56819646	chr1	56819646	B	H	A	H	A	B	B	A	A	A	A	B	A	B	B	A	B	B	A	A	A	B	B	A	A	H	B	B	B	A	B	A	B	A	B	B	A	A	B	A	B	B	A	A	B	B	A
chr1_56978062	chr1	56978062	B	H	A	B	A	B	B	A	A	A	A	B	A	B	B	A	B	B	A	A	A	B	B	A	A	H	B	B	B	A	B	A	B	A	B	B	A	A	B	A	B	B	A	A	B	B	A
chr1_57019248	chr1	57019248	B	H	A	H	H	B	B	A	A	A	A	B	A	B	B	A	B	B	A	A	A	B	B	A	A	A	B	B	H	A	A	A	B	A	B	B	A	A	B	A	B	B	A	A	B	B	A
chr1_57290128	chr1	57290128	B	H	A	B	A	B	B	A	A	A	A	B	A	B	B	A	B	B	A	A	A	B	B	A	A	A	B	B	H	A	A	A	B	A	B	B	A	A	B	A	B	B	A	H	A	B	A
chr1_57745154	chr1	57745154	B	A	A	B	A	B	*	A	A	A	A	B	A	B	B	A	B	B	B	B	A	A	A	A	A	A	B	B	*	A	A	A	B	A	B	B	A	B	B	A	B	B	A	B	*	B	A
chr1_57777644	chr1	57777644	B	A	A	H	A	B	B	A	A	A	A	B	A	B	B	A	B	B	B	B	A	A	A	A	A	A	B	B	H	A	A	A	B	A	B	B	A	B	B	A	B	B	A	B	A	B	A
chr1_57759545	chr1	57759545	B	A	A	B	A	B	B	A	A	A	A	B	A	B	B	A	B	B	B	B	A	A	A	A	A	A	B	B	H	H	A	A	B	A	B	B	A	B	B	A	B	B	A	B	A	B	A
chr1_57928418	chr1	57928418	B	A	A	H	A	B	B	A	A	A	A	B	A	B	B	A	B	B	B	B	A	A	A	A	A	A	B	B	H	A	A	A	B	A	B	B	A	B	B	A	B	B	A	B	*	B	A
chr1_57991925	chr1	57991925	B	A	A	H	A	B	B	A	A	A	A	B	A	B	B	A	B	B	B	B	A	A	A	A	A	A	B	B	H	A	A	A	B	A	B	B	A	B	B	A	B	B	A	B	B	B	A
chr1_58012072	chr1	58012072	B	A	A	H	A	B	B	A	A	A	A	B	A	B	B	A	B	B	B	B	A	A	A	A	A	A	B	B	H	A	A	A	B	A	B	B	A	B	B	A	B	B	A	B	A	B	A
chr1_58046622	chr1	58046622	B	A	A	B	A	B	B	A	A	A	A	B	A	B	B	A	B	B	B	B	A	A	A	A	A	A	B	B	H	A	A	A	B	A	B	B	A	B	B	A	A	B	A	B	*	B	A
chr1_58638189	chr1	58638189	B	A	A	H	A	B	B	A	A	A	A	B	A	B	B	A	A	B	B	B	A	A	A	A	A	A	B	B	H	A	A	A	B	A	B	B	A	B	B	A	A	B	A	B	B	B	A
chr1_58237030	chr1	58237030	B	A	A	B	A	B	B	A	A	A	A	B	A	B	B	A	A	B	B	B	A	A	A	A	A	A	B	B	H	A	A	A	B	A	B	B	A	B	B	A	*	B	A	B	B	B	A
chr1_59713575	chr1	59713575	B	A	A	H	A	B	B	B	A	A	A	A	A	B	B	A	A	B	B	B	A	A	A	A	A	A	B	B	H	A	A	A	B	A	B	B	A	B	B	A	A	B	A	B	A	B	A
chr1_59752424	chr1	59752424	B	A	A	B	A	B	B	B	A	A	A	A	A	B	B	A	A	B	B	B	A	A	A	A	A	A	B	B	H	A	A	A	B	A	B	B	A	B	B	A	A	B	A	B	*	B	A
chr1_59849664	chr1	59849664	B	A	A	B	A	B	A	B	A	A	A	A	A	B	B	A	A	B	B	B	A	A	A	A	A	A	B	B	H	H	A	A	B	A	B	B	A	B	B	A	A	B	A	B	A	B	A
chr1_59927908	chr1	59927908	B	A	A	B	A	B	A	B	A	A	A	A	A	B	B	A	A	B	B	B	A	A	A	A	A	A	B	B	H	A	A	A	B	A	B	B	A	B	B	A	A	B	A	B	B	B	A
chr1_60082941	chr1	60082941	B	B	A	B	A	B	A	B	A	A	A	A	A	B	B	A	A	B	B	B	A	A	A	A	A	A	B	B	H	A	A	A	B	A	B	B	A	B	B	A	A	B	A	B	*	B	A
chr1_60188471	chr1	60188471	B	B	A	B	A	B	A	B	A	A	A	A	A	B	B	A	A	B	B	B	A	A	A	A	A	A	B	B	H	A	A	A	B	A	B	B	A	B	B	A	A	B	A	B	B	B	A
chr1_60227100	chr1	60227100	B	B	B	B	A	B	A	B	A	A	A	A	A	B	B	A	A	B	B	B	A	A	A	A	A	A	B	B	H	A	A	A	B	A	B	B	A	B	B	A	A	B	A	B	B	B	A
chr1_60244638	chr1	60244638	B	B	B	H	A	B	A	B	A	A	A	A	A	B	B	A	A	B	B	B	A	A	A	B	A	A	B	B	A	A	A	A	B	A	B	B	A	B	B	A	A	B	A	B	A	B	A
chr1_60802801	chr1	60802801	B	B	B	H	A	B	A	B	A	A	A	H	A	B	B	A	A	B	B	B	A	A	A	B	A	A	B	B	H	A	A	A	B	A	B	B	A	B	B	A	A	B	A	B	B	B	A
chr1_60489284	chr1	60489284	B	B	B	B	A	B	A	B	A	A	A	A	A	B	B	A	A	B	B	B	A	A	A	B	A	A	B	B	H	A	A	A	B	A	B	B	A	B	B	A	A	B	A	B	B	B	A
chr1_60344952	chr1	60344952	B	B	B	B	A	B	A	B	A	A	A	A	A	B	A	A	A	B	B	B	A	A	A	B	A	A	B	B	B	A	A	A	B	A	B	B	A	B	B	A	A	B	A	B	A	B	A
chr1_63758128	chr1	63758128	B	B	B	B	A	B	A	B	A	A	A	A	A	B	A	A	A	B	B	B	A	A	A	B	A	A	B	B	A	A	A	A	B	A	B	B	A	B	B	A	*	B	A	B	*	B	A
chr1_61793064	chr1	61793064	B	B	B	B	A	B	A	B	A	A	A	A	A	B	A	A	A	B	B	B	A	A	A	B	A	B	B	B	H	A	A	A	B	A	B	B	A	B	B	A	A	B	A	B	B	B	A
chr1_62803439	chr1	62803439	B	B	B	B	A	B	A	B	A	A	A	A	A	B	A	A	A	B	B	B	A	A	A	B	A	B	B	B	A	A	A	A	B	A	B	B	A	B	B	A	A	B	A	B	B	B	A
chr1_61241369	chr1	61241369	B	B	B	B	H	B	A	B	A	A	A	A	A	B	A	A	A	B	B	B	A	A	A	B	A	B	B	B	H	A	A	A	B	A	B	B	A	B	B	A	A	B	A	B	B	B	A
chr1_63833481	chr1	63833481	B	B	B	B	A	B	*	B	A	A	A	A	A	B	A	A	A	B	B	B	A	A	A	B	A	*	B	B	H	A	A	A	B	A	B	B	A	B	B	A	A	B	A	A	A	B	A
chr1_64360876	chr1	64360876	B	B	B	B	A	B	A	B	A	A	A	A	A	B	A	A	A	B	B	B	A	A	A	B	A	*	B	B	H	A	A	A	B	A	B	B	A	B	B	A	A	B	A	A	A	B	A
chr1_64477894	chr1	64477894	B	B	B	H	A	B	A	B	A	A	A	A	A	B	A	A	A	B	B	B	A	A	A	B	A	*	B	B	H	A	A	A	B	A	B	B	A	B	B	A	A	B	A	H	B	B	A
chr1_64387758	chr1	64387758	B	B	B	H	A	B	A	B	A	A	A	A	A	B	A	A	A	B	B	B	A	A	A	B	A	A	B	B	A	A	A	A	B	A	B	B	A	B	B	A	A	B	A	A	*	B	A
chr1_64630322	chr1	64630322	B	B	B	H	A	B	A	B	A	A	A	A	A	H	A	A	A	B	B	B	A	A	A	B	B	*	B	B	H	A	A	A	B	A	B	B	A	B	B	A	A	B	B	A	A	B	A
chr1_65357422	chr1	65357422	B	B	B	H	A	B	A	B	A	A	A	A	A	H	A	A	A	B	B	B	B	A	A	B	B	B	B	B	H	A	A	A	B	A	B	B	A	B	B	A	A	B	B	A	*	B	A
chr1_65860332	chr1	65860332	B	B	B	H	A	B	A	B	A	A	A	A	A	H	A	A	A	B	B	B	B	A	A	B	B	B	B	B	H	A	A	A	B	A	B	B	A	B	B	A	A	B	B	A	A	B	A
chr1_66004547	chr1	66004547	B	B	B	B	A	B	A	B	A	A	A	A	A	B	A	A	A	B	B	B	B	A	A	B	B	B	B	B	H	A	A	A	B	A	B	B	A	B	B	A	A	B	B	A	A	B	A
chr1_66027059	chr1	66027059	B	B	B	B	A	B	A	B	A	A	A	A	A	B	A	A	A	B	B	B	B	A	A	B	B	B	B	B	H	A	A	A	B	A	B	B	A	B	B	A	A	B	B	A	A	B	A
chr1_66976076	chr1	66976076	B	B	B	B	A	B	*	B	*	A	A	A	A	B	A	A	A	B	B	B	B	A	A	B	B	B	B	B	H	A	A	*	B	A	B	B	A	B	B	A	A	B	B	*	*	B	A
chr1_67679409	chr1	67679409	B	B	B	H	A	B	A	B	A	A	A	A	A	B	B	A	A	A	B	B	B	A	A	B	B	B	B	B	H	A	A	A	B	A	B	B	A	B	B	A	A	B	B	A	A	B	A
chr1_67264119	chr1	67264119	B	B	B	H	A	B	A	B	B	A	A	A	A	B	B	A	A	A	B	B	B	A	A	B	B	*	B	B	H	A	A	A	B	A	B	B	A	B	B	A	A	B	B	A	B	B	A
chr1_68319511	chr1	68319511	B	B	B	H	A	B	A	B	A	A	A	A	A	B	B	A	A	A	B	B	B	A	A	B	B	*	B	B	H	A	A	A	B	B	B	B	A	B	B	A	A	B	B	A	A	B	A
chr2_6129181	chr2	6129181	A	B	B	B	B	B	B	A	*	B	B	A	B	H	A	A	A	A	A	B	A	B	B	B	B	A	B	B	B	B	A	A	B	A	B	B	A	A	A	B	B	A	A	B	*	H	B
chr2_6484474	chr2	6484474	A	B	B	B	B	B	B	A	B	B	B	B	B	B	A	H	A	A	A	B	A	B	B	B	B	A	B	B	B	B	A	A	B	A	B	B	A	A	B	B	B	A	A	B	B	H	B
chr2_6769831	chr2	6769831	A	B	B	B	B	B	B	A	A	B	B	*	B	B	A	H	A	A	A	B	A	B	B	B	B	A	B	B	B	B	A	A	B	A	B	B	A	H	A	A	B	A	A	B	A	H	B
chr2_7985407	chr2	7985407	A	B	B	B	B	B	B	A	A	B	A	*	B	B	B	H	A	A	A	B	A	B	B	B	B	*	B	B	B	B	A	B	B	A	B	B	A	H	A	*	B	A	A	B	A	A	B
chr2_9674840	chr2	9674840	A	B	B	B	B	B	B	A	A	B	A	*	B	B	B	B	A	A	B	B	A	B	B	B	B	*	B	B	A	H	A	B	B	A	B	B	A	H	A	*	A	B	A	B	A	B	B
chr2_11089077	chr2	11089077	A	B	B	B	B	B	B	A	A	B	A	B	B	B	B	B	A	A	B	B	A	B	B	B	B	B	B	B	H	B	A	B	B	A	A	B	A	H	A	B	A	A	A	B	A	B	A
chr2_12217825	chr2	12217825	A	B	B	B	B	B	B	A	A	B	A	B	B	B	B	B	A	A	B	B	A	B	B	B	B	B	B	B	*	B	A	B	B	A	A	B	A	B	A	B	A	A	A	B	A	B	A
chr2_12306994	chr2	12306994	A	A	B	B	B	B	B	A	A	B	A	A	B	B	B	B	A	A	B	B	A	B	B	B	B	A	B	B	H	B	A	B	B	A	A	B	A	B	A	B	A	A	A	B	A	B	A
chr2_12426082	chr2	12426082	A	A	B	B	B	B	B	A	A	B	A	A	B	B	B	B	A	A	B	B	A	B	B	B	B	A	B	B	H	B	A	B	B	A	A	B	A	B	A	B	A	A	A	B	A	B	A
chr2_12988892	chr2	12988892	A	A	B	B	B	B	B	A	A	B	H	A	B	B	B	B	A	B	B	B	A	B	B	B	B	A	B	B	H	B	A	B	B	A	A	B	A	B	A	A	A	A	A	B	A	B	A
chr2_13121958	chr2	13121958	A	A	B	B	B	B	B	A	A	B	H	A	B	B	B	B	A	B	B	B	A	B	B	B	B	A	B	B	H	B	A	B	B	A	A	B	A	B	A	A	A	A	A	B	A	B	A
chr2_16917845	chr2	16917845	A	A	B	B	B	B	B	A	A	B	H	A	B	B	B	B	A	B	B	B	A	B	B	B	B	A	B	B	H	B	A	B	B	A	A	B	A	B	A	A	B	A	A	B	A	B	A
chr2_17742712	chr2	17742712	A	A	B	B	B	B	B	A	A	B	H	A	B	B	B	B	A	B	B	B	A	A	B	B	B	B	B	B	H	B	A	B	B	A	A	B	A	B	A	B	B	A	A	B	A	B	A
chr2_19192198	chr2	19192198	A	A	B	B	B	B	B	A	A	B	B	H	B	B	B	B	A	B	B	B	A	A	B	B	B	*	B	B	H	B	A	B	B	A	A	B	A	B	A	B	B	A	A	B	A	B	A
chr2_56090334	chr2	56090334	A	B	B	B	B	B	B	A	A	B	B	B	B	B	A	B	A	B	A	B	A	A	B	B	B	A	B	B	H	H	A	B	B	A	A	B	A	B	A	*	B	A	A	B	A	B	A
chr2_56553810	chr2	56553810	A	A	B	B	B	B	B	A	A	B	B	B	B	B	A	B	B	B	A	B	A	A	B	B	B	A	B	B	H	H	A	A	B	A	B	B	A	B	A	A	B	A	B	B	A	B	A
chr2_56697928	chr2	56697928	A	A	B	B	B	B	B	A	A	B	B	B	B	B	A	B	B	B	A	B	A	A	B	B	B	A	B	B	H	H	A	A	B	A	B	A	A	B	A	A	B	A	B	B	A	B	A
chr2_57151745	chr2	57151745	A	A	A	B	B	B	B	A	A	B	A	A	B	B	A	H	B	B	A	B	A	A	B	*	B	A	B	B	H	H	*	A	B	A	A	B	A	B	A	A	B	A	B	A	A	B	A
chr2_57439908	chr2	57439908	A	A	A	B	B	B	B	A	A	B	A	B	B	B	A	H	B	B	A	B	A	A	B	A	B	A	B	B	A	H	A	A	B	A	A	B	A	B	A	B	B	A	B	A	A	B	A
chr2_57592500	chr2	57592500	A	A	A	B	B	A	B	A	A	B	A	B	B	B	A	A	B	B	A	B	A	A	B	H	B	A	B	B	A	H	A	A	B	A	A	B	A	B	A	B	B	A	B	A	A	B	A
chr2_58238371	chr2	58238371	A	B	A	B	B	B	B	A	A	A	A	A	B	B	A	H	B	B	A	B	A	A	B	B	B	B	B	B	A	H	A	A	B	A	A	B	A	B	A	B	B	A	B	A	A	B	A
chr2_58427080	chr2	58427080	A	B	A	B	B	B	B	A	A	A	A	B	B	B	A	H	B	B	A	B	A	B	B	B	B	B	B	B	A	H	A	A	B	A	A	B	A	B	A	B	B	A	B	A	A	B	A
chr2_58841645	chr2	58841645	A	B	A	B	B	B	A	A	A	A	A	A	B	B	A	A	B	B	A	B	A	B	B	B	B	B	B	B	A	H	A	A	A	A	A	B	A	H	B	*	A	A	B	A	A	B	A
chr2_58954563	chr2	58954563	A	B	A	A	B	B	A	A	A	A	A	A	B	H	A	A	A	B	A	B	A	B	B	B	B	A	B	B	A	H	A	A	A	A	A	B	A	H	B	A	A	A	B	A	A	B	A
chr2_59230432	chr2	59230432	A	B	A	H	B	B	A	A	A	A	A	B	B	H	A	H	A	B	A	B	A	B	B	B	B	B	B	B	A	H	A	A	A	A	A	B	A	H	B	B	A	A	B	A	A	B	A
chr2_59633489	chr2	59633489	A	B	A	A	B	B	A	A	A	A	A	B	B	B	A	H	A	B	A	B	A	B	B	B	B	B	B	B	A	H	A	A	A	A	A	B	A	H	B	B	A	A	B	A	A	B	A
chr2_59651259	chr2	59651259	A	B	A	A	B	B	A	A	A	A	A	B	B	B	A	H	A	B	A	B	A	B	B	B	B	B	B	B	A	H	A	A	B	A	A	B	A	A	B	B	A	A	B	A	A	B	A
chr2_59794696	chr2	59794696	A	B	A	A	B	H	A	B	A	A	A	B	B	H	A	H	A	B	A	B	B	B	B	B	B	*	B	B	A	H	A	A	B	A	A	B	A	A	B	B	A	A	B	A	A	B	A
chr2_59821696	chr2	59821696	A	B	A	A	B	B	A	B	A	A	A	B	B	B	A	H	A	B	A	B	B	B	B	B	B	B	B	B	A	H	A	A	B	A	A	B	A	H	B	B	A	A	B	A	A	B	A
chr2_59947785	chr2	59947785	A	B	A	A	B	B	A	B	A	B	A	B	B	B	A	A	A	B	A	B	B	A	B	B	B	A	B	B	A	H	A	A	A	A	A	B	A	H	B	B	A	A	B	A	A	B	A
chr2_60550968	chr2	60550968	A	B	A	A	B	B	A	B	A	B	A	B	B	B	A	H	B	B	A	B	B	B	B	B	B	A	B	B	A	H	A	A	B	A	A	B	A	H	B	B	A	B	B	A	A	B	A
chr2_61098233	chr2	61098233	B	B	A	A	B	B	A	B	A	B	A	B	B	B	A	H	B	B	A	B	B	A	B	B	B	A	B	B	A	H	A	A	A	A	A	B	A	H	B	B	A	A	B	A	A	B	A
chr2_61142791	chr2	61142791	B	B	A	A	B	B	A	B	A	B	A	B	B	B	A	H	B	B	A	B	B	B	B	B	B	A	B	B	A	*	A	A	B	A	A	B	A	H	A	B	A	A	B	A	A	B	A
chr2_61206356	chr2	61206356	B	B	A	H	B	B	A	B	A	B	A	B	B	B	A	H	B	B	A	B	B	B	B	B	B	A	B	B	A	H	A	A	B	A	A	B	A	H	B	B	A	A	B	A	A	B	A
chr2_61218459	chr2	61218459	B	B	B	H	B	B	A	B	A	B	A	B	B	B	A	H	B	B	A	B	B	B	B	B	B	A	B	B	B	H	A	A	B	A	A	B	A	B	B	B	A	A	B	A	A	B	A
chr2_61313768	chr2	61313768	B	B	B	A	H	B	A	B	A	B	A	B	B	B	A	H	B	B	A	B	B	B	A	B	B	A	B	A	B	H	A	A	B	A	A	B	A	B	B	B	A	A	B	A	A	B	A
chr2_61543225	chr2	61543225	B	B	B	A	B	B	A	B	A	B	A	B	B	B	A	H	B	B	A	B	B	*	A	B	B	A	B	A	B	H	A	A	*	A	A	B	A	B	A	B	A	A	B	A	A	B	A
chr2_61584057	chr2	61584057	B	B	B	A	B	B	A	B	A	B	A	B	B	B	A	H	B	B	A	B	B	B	A	B	B	B	B	A	B	H	A	A	B	A	A	B	A	B	B	B	A	A	B	A	A	B	A
chr2_61670348	chr2	61670348	B	B	B	H	B	B	A	B	A	B	A	B	B	B	H	H	B	B	A	B	B	B	A	B	B	B	B	A	B	A	A	A	B	A	A	B	A	B	*	B	A	A	B	A	A	B	A
chr2_61885069	chr2	61885069	A	B	B	H	B	B	A	B	A	B	A	B	B	B	A	A	B	B	A	B	B	*	A	B	B	B	B	A	B	H	A	A	*	A	A	B	A	B	B	B	A	A	A	B	B	B	A
chr2_62141192	chr2	62141192	A	B	B	A	B	B	A	B	A	B	A	B	B	H	A	A	B	B	A	B	B	A	A	B	B	B	B	A	B	A	A	A	A	A	A	A	A	B	B	B	A	A	A	B	B	B	A
chr2_62292240	chr2	62292240	A	B	B	A	B	*	A	*	A	B	A	B	B	B	A	A	B	B	A	B	B	A	A	A	B	B	B	A	B	A	A	A	A	A	A	A	A	B	B	B	A	A	A	B	B	B	A
chr2_62721810	chr2	62721810	A	B	H	A	B	B	A	B	A	B	A	B	B	B	A	H	B	B	A	B	B	A	A	A	B	B	B	A	B	A	A	A	A	A	A	A	A	B	B	B	A	A	A	B	B	B	B
chr2_63218674	chr2	63218674	A	B	H	A	B	B	A	B	A	B	A	B	B	B	A	A	B	B	A	B	B	A	A	A	B	B	B	A	B	A	A	A	A	A	A	A	A	B	B	B	A	A	A	B	B	B	B
chr2_63594412	chr2	63594412	A	B	B	A	B	B	A	B	A	B	A	B	B	H	A	H	B	B	A	B	B	A	A	A	B	B	B	A	B	A	A	A	A	A	A	A	A	A	B	B	A	A	A	B	B	B	B
chr2_63621131	chr2	63621131	A	B	B	A	B	B	A	B	A	B	A	B	B	B	A	H	B	B	A	B	B	A	A	A	B	B	B	A	B	A	A	A	A	A	A	A	A	H	B	B	A	A	A	B	B	B	B
chr2_63653820	chr2	63653820	A	H	B	A	B	B	A	B	A	B	A	B	B	B	A	H	B	B	A	B	B	B	A	A	B	B	B	A	B	A	A	A	B	A	A	A	A	H	B	B	A	A	A	B	B	B	B
chr2_63668485	chr2	63668485	A	B	B	A	B	B	A	B	A	B	A	B	B	B	A	H	B	B	A	A	B	B	A	A	B	B	B	A	B	A	A	A	B	A	A	A	A	H	B	B	A	A	A	B	B	B	B
chr2_63714565	chr2	63714565	A	B	B	H	B	B	A	B	A	B	A	B	B	B	A	H	B	B	A	A	B	B	A	A	B	B	B	A	B	A	A	A	B	A	A	A	A	H	B	B	A	A	A	B	B	B	B
chr2_64316923	chr2	64316923	A	B	B	H	B	B	A	B	A	B	A	B	B	B	A	B	B	B	A	A	B	B	A	A	B	B	B	A	B	A	A	A	B	A	A	A	A	H	B	B	A	A	A	B	B	B	B
chr2_64833568	chr2	64833568	A	B	B	A	B	B	A	B	A	B	A	B	B	H	A	B	B	B	A	A	B	B	A	A	B	B	B	A	B	A	A	A	B	A	A	A	A	H	B	B	A	A	A	H	B	B	B
chr2_64954437	chr2	64954437	A	B	B	A	B	B	A	B	A	B	A	B	B	B	A	B	B	B	A	A	B	B	A	A	B	B	B	A	B	A	A	A	B	A	A	A	A	H	B	B	A	A	A	B	B	B	B
chr2_65314912	chr2	65314912	A	B	B	A	H	B	A	B	A	B	A	B	B	B	A	B	B	B	A	A	B	B	A	A	B	B	B	A	B	A	A	A	B	A	A	A	A	H	B	B	A	A	A	B	B	A	B
chr2_65467778	chr2	65467778	A	B	B	A	B	B	A	B	A	B	A	B	B	H	A	B	B	B	A	A	B	B	A	A	B	B	B	A	B	A	A	A	B	A	A	A	A	H	B	B	A	B	A	B	B	A	B
chr2_65537676	chr2	65537676	A	B	B	H	B	B	H	B	A	B	A	B	B	H	A	B	B	B	A	A	B	B	A	A	B	B	B	A	B	A	A	A	B	A	A	A	A	H	B	B	A	B	A	B	B	A	B
chr2_65640384	chr2	65640384	A	B	B	A	B	B	A	H	A	B	A	B	B	B	A	B	B	B	A	A	B	B	A	A	B	B	B	A	B	A	A	A	B	A	A	A	A	H	B	B	A	B	A	B	B	A	B
chr2_65804562	chr2	65804562	A	A	B	A	B	B	A	B	A	B	A	B	B	B	A	B	B	B	A	A	B	B	A	A	B	B	B	A	B	A	A	A	B	A	A	A	A	H	B	B	A	B	A	B	B	A	B
chr2_65966586	chr2	65966586	A	A	B	H	B	B	A	B	A	B	A	B	B	B	A	B	B	B	A	A	B	B	A	A	B	B	B	A	B	H	A	A	B	A	A	A	A	H	B	B	A	B	A	B	B	A	B
chr2_66136677	chr2	66136677	A	A	B	A	B	B	A	B	A	B	A	B	B	B	A	B	B	B	A	A	B	B	A	A	B	B	H	A	B	A	A	A	B	A	A	A	A	B	B	B	A	B	A	B	B	A	B
chr2_66372598	chr2	66372598	A	A	B	A	B	B	A	B	A	B	A	B	B	B	A	B	B	B	A	A	B	B	A	A	B	B	B	A	B	A	A	A	B	A	B	A	A	B	B	B	A	B	A	B	B	A	B
chr2_66672707	chr2	66672707	A	A	B	H	B	B	A	B	A	B	A	B	B	B	A	B	B	B	A	A	B	B	A	A	B	B	B	A	B	B	A	A	B	A	B	A	A	B	B	B	A	B	A	B	B	A	B
chr2_69292725	chr2	69292725	A	A	B	A	B	B	A	B	A	B	B	B	B	B	A	B	B	B	A	A	B	B	A	A	A	B	B	A	B	H	A	A	B	A	B	A	A	B	B	B	A	B	A	B	B	A	B
chr2_69876651	chr2	69876651	A	A	B	A	A	B	A	B	A	B	B	B	A	B	A	H	B	B	A	A	B	A	A	A	A	A	B	A	H	B	A	A	B	A	B	A	A	B	B	B	A	B	A	B	B	A	B
chr2_70261293	chr2	70261293	A	A	B	A	A	B	A	B	A	B	B	B	A	B	A	H	B	B	A	A	B	A	A	A	A	A	B	A	B	B	A	A	B	A	B	A	A	B	B	B	A	B	A	B	B	A	B
chr2_70678064	chr2	70678064	A	A	B	A	A	B	A	B	A	B	B	A	A	B	A	H	B	B	B	A	B	A	A	A	A	A	B	A	B	B	A	A	*	A	B	A	A	B	B	B	A	B	A	B	*	A	B
chr2_70512564	chr2	70512564	A	A	B	A	A	B	A	B	A	B	B	B	A	B	A	H	B	B	B	A	B	A	A	A	A	A	B	A	B	B	A	A	A	A	B	A	A	B	B	B	A	B	A	B	A	B	B
chr2_70724445	chr2	70724445	A	A	B	A	A	B	A	B	A	B	B	A	A	B	A	H	B	B	B	A	B	A	A	A	A	A	B	A	B	B	A	A	B	A	B	A	A	B	B	B	A	B	A	B	B	B	B
chr2_70809995	chr2	70809995	A	A	B	A	A	B	A	B	A	B	B	B	A	B	A	B	B	B	B	A	B	A	A	A	A	A	B	A	B	B	A	A	*	A	B	A	B	B	B	B	A	B	A	B	*	B	B
chr2_71037473	chr2	71037473	A	A	B	A	A	B	A	B	A	B	B	B	A	H	A	H	B	B	B	A	B	A	A	A	A	B	B	A	B	B	A	A	B	A	B	A	B	B	B	B	A	B	A	B	B	B	B
chr2_71246309	chr2	71246309	A	A	B	A	A	B	*	B	A	B	B	B	A	B	A	B	B	B	B	A	B	A	A	A	A	B	B	A	B	B	A	A	B	A	B	B	B	B	B	B	A	B	H	B	B	B	B
chr2_72174255	chr2	72174255	A	A	B	A	A	B	A	B	A	B	B	A	A	B	A	H	B	B	B	A	B	A	A	A	A	B	B	A	B	B	A	A	B	A	B	B	B	B	B	B	A	B	A	B	B	B	B
chr2_72207068	chr2	72207068	A	A	B	A	A	B	A	B	A	B	B	A	A	H	A	H	B	B	B	A	B	A	A	A	A	B	B	A	B	B	A	A	A	A	B	B	B	B	B	B	A	B	A	B	A	B	B
chr2_74079509	chr2	74079509	A	A	B	A	A	B	A	B	*	B	B	A	A	B	A	B	B	A	B	B	B	B	A	A	A	B	B	A	B	B	A	A	*	A	B	B	B	B	B	B	A	B	A	B	*	B	B
chr2_74193320	chr2	74193320	A	A	B	A	A	B	A	B	A	B	B	A	A	B	A	B	B	A	B	B	B	B	A	A	A	B	B	A	B	B	A	A	A	A	B	B	B	B	B	B	A	B	A	B	A	B	B
chr2_75406924	chr2	75406924	A	A	B	A	A	B	A	B	*	B	A	A	A	B	A	H	B	A	B	B	B	B	A	A	A	B	B	A	B	B	A	A	*	A	B	B	B	B	B	B	B	A	B	B	*	B	B
chr2_75989124	chr2	75989124	A	A	B	A	A	B	A	B	A	B	A	A	A	B	A	H	B	A	B	B	B	B	B	A	A	A	B	A	B	B	A	A	A	A	B	B	B	B	B	B	B	A	B	B	A	B	B
chr2_76452862	chr2	76452862	A	A	B	A	A	B	A	B	A	B	B	A	A	B	A	A	B	A	B	B	B	B	B	A	A	A	B	A	B	B	A	A	A	A	B	B	B	B	B	B	B	A	B	B	A	B	B
chr2_76601807	chr2	76601807	A	A	B	A	A	B	A	B	B	B	B	A	A	B	A	A	B	A	B	B	B	B	B	A	A	A	B	A	B	B	A	A	B	A	B	B	B	B	B	B	B	A	B	B	B	B	B
chr2_76623542	chr2	76623542	A	A	B	A	*	B	A	B	B	B	B	A	A	B	A	A	B	A	B	B	B	B	B	A	A	A	B	A	B	*	A	A	B	A	B	B	B	B	B	B	B	A	B	B	B	B	B
chr2_77084418	chr2	77084418	A	A	B	A	A	B	A	B	A	B	B	A	A	B	A	A	B	A	B	B	B	B	B	A	A	*	B	A	B	B	A	A	B	A	B	B	B	B	B	B	B	A	B	B	*	B	B
chr2_77109508	chr2	77109508	A	A	B	A	A	B	A	B	A	B	B	A	A	H	A	A	B	A	B	B	B	B	A	A	A	*	B	A	B	B	A	A	*	A	B	B	B	B	B	B	B	A	B	B	*	B	B
chr2_77206520	chr2	77206520	A	A	B	A	A	B	A	B	A	B	B	A	A	B	A	A	B	A	B	B	B	B	A	A	A	B	B	A	B	A	A	A	B	A	B	B	B	B	B	B	B	A	B	B	B	B	B
chr3_138344	chr3	138344	A	B	A	H	B	B	B	A	A	A	A	A	B	B	B	H	A	B	A	B	A	B	A	B	B	A	B	A	B	B	B	B	A	B	H	B	B	A	B	B	A	A	B	B	A	B	B
chr3_936105	chr3	936105	A	B	A	H	B	B	B	A	A	A	A	A	B	B	B	B	A	B	A	B	A	B	A	B	B	A	B	A	B	B	B	B	A	B	H	B	B	A	A	B	A	A	B	B	A	B	A
chr3_980074	chr3	980074	A	B	A	H	B	B	B	A	A	A	A	A	B	B	B	B	A	B	A	B	A	B	A	B	B	A	B	A	B	B	B	B	A	B	H	B	B	A	A	B	A	A	B	B	A	B	A
chr3_1103127	chr3	1103127	A	B	A	A	B	B	B	A	B	A	A	B	B	B	B	B	A	B	A	B	A	B	A	B	A	A	B	A	B	B	B	B	A	B	H	B	B	A	B	B	A	A	B	B	A	B	A
chr3_1252950	chr3	1252950	A	B	A	A	B	B	B	A	B	A	A	B	B	B	B	B	A	B	A	B	A	B	A	B	A	A	B	A	B	B	B	B	A	B	H	B	B	A	B	B	A	A	B	H	A	B	A
chr3_1143304	chr3	1143304	A	B	A	H	B	B	B	A	B	A	A	B	B	B	B	B	A	B	A	B	A	B	A	B	A	A	B	A	B	B	B	B	A	B	B	B	B	A	B	B	A	A	B	B	A	A	A
chr3_1280083	chr3	1280083	A	H	A	A	H	B	B	A	B	A	A	B	B	B	B	B	A	B	A	B	A	B	A	B	A	A	B	A	B	B	*	B	A	B	B	B	B	A	A	B	A	A	B	H	A	A	A
chr3_1896923	chr3	1896923	A	B	A	A	B	B	B	A	B	A	A	*	B	B	B	B	A	B	A	B	B	B	A	B	A	B	B	A	B	B	B	*	A	B	B	B	A	A	A	B	A	A	B	B	A	A	A
chr3_1799112	chr3	1799112	A	B	A	A	B	B	A	A	B	A	A	*	B	B	B	B	A	B	A	B	B	B	A	B	A	B	B	A	B	B	H	B	A	B	B	B	A	A	*	B	A	A	B	B	A	A	A
chr3_4760409	chr3	4760409	A	B	A	A	A	B	A	B	*	A	A	A	A	B	B	B	A	B	A	B	B	B	A	B	A	A	A	A	B	B	B	A	A	A	B	B	A	A	B	B	B	A	B	B	A	A	A
chr3_7517250	chr3	7517250	A	B	A	A	A	B	A	B	A	A	B	*	A	A	B	H	A	B	B	A	B	B	A	H	A	A	B	A	A	A	A	A	A	A	B	B	A	A	*	B	B	B	B	B	A	A	A
chr3_8465317	chr3	8465317	A	B	B	A	A	B	A	B	B	A	A	B	A	A	B	H	B	B	B	A	B	B	A	A	A	A	B	A	A	A	A	A	A	A	B	B	A	A	B	B	B	B	B	B	B	A	A
chr3_10346935	chr3	10346935	A	B	A	A	A	B	H	B	B	A	B	A	A	A	B	H	B	A	B	A	B	B	A	A	A	A	B	A	A	A	A	A	A	A	B	B	A	A	A	B	A	B	B	H	B	A	A
chr3_10803934	chr3	10803934	A	B	A	A	A	B	H	B	*	A	B	A	A	A	B	H	B	A	B	A	B	B	A	A	A	A	B	A	A	A	A	A	A	A	B	B	A	A	*	B	A	B	B	B	*	A	A
chr3_12231111	chr3	12231111	A	B	A	A	A	*	A	B	B	A	B	A	A	A	B	H	B	A	B	A	B	B	A	A	A	A	B	A	A	A	A	A	A	B	B	B	A	A	*	B	A	B	B	A	B	A	B
chr3_12265835	chr3	12265835	A	B	A	A	A	B	A	B	*	A	B	A	A	H	B	H	B	A	B	A	B	B	A	A	A	A	B	A	A	A	A	A	A	B	B	B	A	A	*	B	A	B	B	A	*	A	B
chr3_12927186	chr3	12927186	A	B	A	A	A	B	A	B	A	A	B	A	A	H	B	H	B	A	B	A	B	B	A	A	A	A	B	A	A	A	A	A	A	B	A	B	A	A	A	B	A	B	B	A	A	A	B
chr3_13047891	chr3	13047891	A	B	A	A	A	B	A	B	B	A	B	A	A	A	B	H	B	A	B	A	B	B	A	A	A	B	B	A	A	A	A	A	A	B	A	B	A	A	B	B	A	B	B	A	A	A	B
chr3_13236028	chr3	13236028	A	B	A	A	A	B	A	B	*	A	B	A	A	A	B	H	B	A	B	A	B	B	A	A	A	*	B	A	A	A	A	A	A	A	A	B	A	A	B	B	A	B	B	A	A	A	B
chr3_13295593	chr3	13295593	A	B	A	A	A	B	A	B	*	A	B	A	A	A	B	H	B	A	*	A	B	B	A	A	A	B	B	A	A	A	A	A	A	*	A	B	A	A	B	B	A	B	B	A	A	*	B
chr3_13363167	chr3	13363167	A	B	A	A	A	B	A	B	*	A	B	A	A	A	B	B	B	A	B	A	B	B	A	A	A	B	B	A	A	A	A	A	A	A	A	B	A	A	B	B	A	B	B	H	A	A	B
chr3_13438422	chr3	13438422	A	B	A	A	A	B	A	B	*	A	B	A	A	A	B	H	B	A	B	A	B	B	A	A	A	*	B	A	A	A	A	A	A	A	A	B	A	A	*	B	A	B	B	H	A	A	B
chr3_14111117	chr3	14111117	A	B	A	A	A	B	A	B	*	A	B	B	A	H	B	H	B	A	B	A	B	B	B	A	A	*	B	A	A	A	A	A	A	A	A	B	A	A	*	B	A	B	B	A	A	A	B
chr3_14178673	chr3	14178673	A	B	A	A	A	B	A	B	B	A	B	B	A	A	B	H	B	A	B	A	B	B	B	A	A	B	B	A	A	A	A	A	A	A	A	B	A	A	B	B	A	B	B	A	A	A	B
chr3_15022138	chr3	15022138	A	B	A	A	A	B	A	B	B	A	B	B	A	A	B	H	B	A	B	A	B	B	B	A	A	B	B	A	A	A	A	A	A	A	A	B	A	A	B	B	A	B	A	A	B	A	B
chr3_15480194	chr3	15480194	A	B	A	A	A	B	A	B	B	*	B	B	A	A	B	H	B	A	B	A	B	B	B	A	A	B	B	A	A	A	A	*	A	A	A	B	A	A	B	B	A	B	A	H	B	A	B
chr3_15547653	chr3	15547653	A	B	A	A	A	B	A	B	B	A	B	B	A	A	B	H	B	A	B	A	B	B	B	B	A	B	B	A	A	A	A	A	A	A	A	B	A	A	B	B	A	B	A	A	B	A	B
chr3_16405645	chr3	16405645	A	B	A	A	A	B	A	B	B	A	B	B	A	A	B	B	B	A	A	A	A	B	B	B	A	B	B	A	A	A	A	A	A	A	A	B	A	A	B	B	A	B	A	A	B	A	B
chr3_48561904	chr3	48561904	A	B	A	A	A	B	A	B	B	A	B	B	A	A	B	H	B	A	A	A	A	B	B	B	A	B	B	A	A	A	A	A	A	A	A	B	A	A	B	B	A	B	A	A	B	A	B
chr3_50722212	chr3	50722212	A	B	A	A	A	B	A	B	A	A	B	B	A	A	B	H	B	A	A	A	A	B	B	B	A	A	B	A	A	A	A	A	A	A	A	B	A	A	B	B	A	B	A	A	H	A	B
chr3_51307775	chr3	51307775	A	B	A	A	A	B	A	B	A	A	B	B	A	H	B	H	B	A	A	A	A	B	B	B	A	A	B	A	A	A	A	H	A	A	A	B	A	A	B	B	A	B	A	A	H	A	B
chr3_52704580	chr3	52704580	A	B	A	A	A	B	A	B	*	A	B	B	A	H	B	H	B	A	A	A	A	B	B	B	A	*	B	A	A	A	A	H	A	A	A	B	A	A	B	B	A	B	A	A	B	A	B
chr3_52411203	chr3	52411203	A	B	A	A	A	B	A	B	B	A	*	B	A	A	B	H	B	A	A	B	A	B	B	B	A	B	B	A	A	A	A	*	A	A	A	B	A	A	B	B	A	B	A	A	B	A	B
chr3_51534254	chr3	51534254	A	H	A	A	*	*	A	B	A	A	B	B	A	A	B	*	B	A	*	B	A	B	B	*	A	A	B	*	A	A	A	H	A	A	A	B	A	A	B	B	A	B	A	A	A	A	B
chr3_53569848	chr3	53569848	A	B	A	A	A	B	A	B	*	A	A	B	A	B	B	H	B	A	A	A	A	B	B	B	A	*	B	A	A	H	A	H	A	A	A	B	A	A	B	B	A	B	A	A	B	A	B
chr3_53702580	chr3	53702580	A	B	A	A	A	B	A	B	B	A	A	B	A	B	B	H	B	A	A	A	A	B	B	B	A	B	B	A	A	H	A	H	A	B	A	B	A	A	B	B	A	B	A	A	B	A	B
chr3_54153308	chr3	54153308	A	B	A	A	A	B	A	B	B	A	A	B	A	B	B	B	B	A	A	A	A	B	B	B	A	*	B	A	A	H	*	H	A	B	A	B	A	A	B	B	A	B	A	A	B	H	B
chr3_54431383	chr3	54431383	A	B	A	A	A	B	A	B	*	A	A	B	A	B	B	H	B	A	A	A	A	B	B	B	A	A	B	A	A	H	A	H	A	B	A	B	A	A	B	B	A	B	A	A	B	A	B
chr3_54778430	chr3	54778430	A	B	A	A	A	B	A	B	A	A	A	B	A	B	B	H	B	A	A	A	A	B	B	B	A	A	B	A	A	H	A	H	A	B	A	B	A	A	B	B	A	B	A	A	H	A	B
chr3_55312358	chr3	55312358	A	B	A	A	A	*	A	B	A	A	A	B	A	B	B	H	B	A	A	A	A	B	B	B	A	A	B	A	A	H	A	A	B	B	A	B	B	A	B	B	A	B	A	A	H	A	B
chr3_55472815	chr3	55472815	A	B	A	A	A	B	A	B	A	A	A	B	A	B	B	H	B	A	A	A	A	B	B	B	A	A	B	A	A	H	A	A	B	B	A	B	B	A	B	B	A	B	A	A	A	A	B
chr3_55437524	chr3	55437524	A	B	A	A	A	B	A	B	A	A	A	B	A	B	B	H	B	A	A	A	A	B	B	B	A	A	B	A	A	H	A	A	B	B	A	B	B	A	B	B	A	B	A	A	H	A	B
chr3_55531535	chr3	55531535	A	B	A	A	A	B	A	B	A	A	A	B	A	B	B	H	B	A	A	A	A	B	B	B	A	A	B	A	A	A	A	A	B	B	A	B	B	A	B	B	A	B	A	A	B	A	B
chr3_56163113	chr3	56163113	A	B	A	A	A	B	A	B	A	A	A	B	A	B	B	H	B	A	A	A	A	B	A	B	A	*	B	A	A	H	A	A	B	B	A	B	B	A	B	B	A	B	A	A	B	A	B
chr3_56300235	chr3	56300235	A	B	A	A	A	B	A	B	A	A	A	B	A	B	B	B	B	A	A	A	A	B	A	B	A	*	B	A	A	H	A	A	B	B	A	B	B	A	B	B	A	B	A	A	B	A	B
chr3_56472591	chr3	56472591	A	B	A	A	A	B	A	B	A	A	A	B	A	B	B	H	B	A	A	A	A	B	A	B	A	*	B	A	B	H	B	A	B	B	A	B	B	A	B	B	A	A	A	A	B	A	B
chr3_56673883	chr3	56673883	A	B	A	A	A	B	A	B	A	A	A	B	A	B	B	H	B	A	A	A	A	B	A	B	A	A	B	A	B	H	B	A	B	B	A	B	B	A	B	B	A	A	A	A	H	A	B
chr3_57130379	chr3	57130379	A	B	A	A	A	B	A	B	A	A	A	B	A	B	B	H	B	A	A	A	A	B	A	B	B	B	B	A	B	H	B	A	B	B	A	H	B	A	A	B	B	A	A	A	B	A	B
chr3_56997497	chr3	56997497	A	B	A	A	A	B	A	B	A	A	A	B	A	B	B	B	B	A	A	A	A	B	A	B	B	B	B	A	B	H	B	A	B	B	A	A	B	A	A	B	B	A	A	A	H	A	B
chr3_57075333	chr3	57075333	A	B	A	A	A	B	A	B	A	A	A	B	A	B	B	H	B	A	A	A	A	B	A	B	B	B	B	A	B	H	B	A	B	B	A	A	B	A	A	B	B	A	A	A	B	H	B
chr3_57333236	chr3	57333236	A	B	A	A	A	B	A	B	A	A	A	B	A	B	B	H	B	A	A	A	B	B	A	A	B	A	B	A	B	B	B	A	B	B	A	A	B	A	A	B	A	A	A	A	B	B	B
chr3_57314254	chr3	57314254	A	B	A	A	A	*	*	B	A	A	A	B	A	B	B	H	B	A	A	A	B	B	A	A	B	*	B	A	B	B	B	A	B	B	A	A	B	A	A	B	A	A	A	A	*	B	B
chr3_57461521	chr3	57461521	A	B	B	A	A	B	A	B	A	A	A	B	A	B	B	H	B	A	A	A	B	B	A	A	B	A	B	A	B	B	B	A	B	B	A	A	B	B	A	B	A	A	A	A	H	B	B
chr3_57925030	chr3	57925030	A	B	B	A	A	B	A	B	A	A	A	A	A	B	B	B	B	A	A	A	B	B	B	A	B	B	B	A	A	H	B	A	B	B	A	A	B	B	A	B	A	A	A	A	A	B	B
chr3_58313976	chr3	58313976	B	A	B	A	A	B	A	B	A	A	A	A	A	B	A	H	B	A	A	A	B	B	B	A	B	B	B	A	A	B	B	A	B	B	A	A	B	B	A	B	A	A	A	A	B	B	B
chr3_58574923	chr3	58574923	B	A	B	A	A	B	A	B	A	A	A	A	A	H	A	B	B	A	A	A	B	B	B	A	B	A	B	A	A	B	B	A	B	B	A	A	B	B	A	B	A	A	A	A	B	B	B
chr3_58733535	chr3	58733535	B	A	B	A	A	B	A	H	A	A	A	A	A	H	A	H	B	A	A	A	B	B	B	A	A	A	B	A	A	B	B	A	B	B	A	A	B	B	A	B	A	A	A	A	A	B	B
chr3_59224870	chr3	59224870	B	A	B	A	A	B	A	B	A	B	A	A	A	H	A	H	B	A	A	A	B	B	*	A	A	A	B	A	A	B	*	A	B	B	A	A	B	B	H	B	A	A	A	A	A	B	B
chr3_59344634	chr3	59344634	B	A	B	A	A	B	A	B	A	B	A	A	A	B	A	H	B	A	A	A	B	B	B	A	A	A	B	A	A	B	B	H	B	B	A	A	B	B	A	B	A	A	A	A	A	B	B
chr3_59500229	chr3	59500229	B	A	B	A	A	B	A	B	A	B	A	A	A	B	A	H	B	A	A	A	B	B	B	A	A	*	B	A	A	B	B	H	B	B	A	A	B	B	A	B	A	A	A	A	*	B	B
chr3_59581029	chr3	59581029	B	A	B	A	A	B	A	B	A	B	A	A	A	B	A	A	B	A	A	A	B	B	B	A	A	*	B	A	A	B	B	H	B	B	A	A	B	B	A	B	A	A	A	A	*	B	B
chr3_59592035	chr3	59592035	B	A	B	A	A	B	A	B	A	B	A	A	A	B	A	A	B	A	A	A	B	B	B	A	A	A	B	A	A	B	B	H	B	B	A	A	B	B	A	B	A	A	A	A	A	B	B
chr3_60119915	chr3	60119915	B	A	B	A	A	B	A	B	A	B	A	A	A	B	A	A	B	A	A	A	B	B	B	A	A	*	B	A	A	B	B	H	B	B	A	A	B	B	A	B	A	A	A	A	A	H	B
chr3_60339879	chr3	60339879	B	A	B	A	A	B	A	B	A	B	A	A	A	B	A	A	B	A	A	A	B	B	B	A	A	A	B	A	A	B	B	H	B	B	A	A	B	B	A	B	A	A	A	A	A	B	B
chr3_60449882	chr3	60449882	B	A	B	A	A	B	A	B	A	B	A	A	A	B	A	A	B	A	A	A	B	B	B	A	A	A	B	A	A	B	B	H	B	B	A	A	B	B	A	B	A	A	A	A	A	H	B
chr3_60544787	chr3	60544787	B	A	B	A	A	*	A	B	A	B	A	A	A	B	A	A	B	A	A	A	B	B	B	A	A	A	B	A	A	B	B	H	B	B	A	A	B	B	A	B	A	A	A	A	A	H	B
chr3_60701801	chr3	60701801	B	*	B	A	A	B	A	B	A	B	A	A	*	B	A	A	B	A	A	A	B	B	B	A	A	*	B	A	A	B	B	H	B	B	A	A	B	B	A	B	A	A	A	A	A	H	B
chr3_60820786	chr3	60820786	B	A	B	A	A	B	A	B	A	B	A	A	A	B	A	A	B	A	A	A	B	B	B	A	A	B	B	A	A	B	B	H	B	B	A	A	B	B	A	A	A	A	A	A	*	H	B
chr3_60933618	chr3	60933618	B	A	B	A	A	B	A	B	A	B	A	A	A	B	A	A	B	A	A	A	B	B	B	A	A	A	B	A	A	B	B	B	B	B	A	A	B	B	A	A	A	A	A	A	B	H	B
chr3_61303071	chr3	61303071	B	A	B	A	A	B	A	*	A	B	A	A	A	B	*	A	B	A	A	A	B	B	B	A	A	A	B	A	A	H	B	*	B	B	A	A	B	B	A	*	*	A	A	A	A	H	B
chr3_61329459	chr3	61329459	B	A	B	A	A	B	A	B	A	B	A	A	A	B	A	A	B	A	A	A	B	B	B	A	A	A	B	A	A	B	B	B	B	B	A	A	B	B	A	A	A	A	A	A	A	H	B
chr3_61495351	chr3	61495351	B	A	B	A	A	B	A	B	A	B	A	A	A	B	A	A	B	A	A	A	B	B	B	A	A	A	B	A	A	B	B	B	B	B	A	A	B	B	A	A	A	A	A	A	A	H	B
chr3_61751351	chr3	61751351	B	A	B	A	A	B	A	B	A	B	B	A	A	B	A	A	B	A	A	A	B	B	B	A	A	A	B	A	A	B	B	B	B	B	A	A	B	B	A	A	A	A	A	A	A	H	B
chr3_61818377	chr3	61818377	B	A	B	A	A	B	A	B	A	B	B	A	A	B	A	A	B	A	A	A	B	B	B	A	A	A	B	A	A	B	B	B	B	B	A	A	B	B	A	A	A	A	A	A	A	B	B
chr3_62167930	chr3	62167930	B	A	B	A	A	B	A	B	A	B	B	B	A	B	A	A	B	A	A	A	B	B	B	A	A	B	B	A	A	B	B	B	B	B	A	A	B	B	A	A	A	A	A	A	B	B	B
chr3_62874914	chr3	62874914	B	B	B	A	A	B	A	B	A	B	B	A	A	B	A	A	B	B	A	A	B	B	B	A	A	B	B	A	A	B	B	B	B	B	A	A	B	B	A	B	A	A	A	A	B	B	B
chr3_63290824	chr3	63290824	B	B	B	A	A	B	A	B	A	B	B	A	A	H	A	A	B	B	A	A	B	B	B	A	A	B	B	A	B	B	B	B	B	B	A	A	B	A	A	B	A	A	A	A	B	B	B
chr3_63449572	chr3	63449572	B	B	B	A	A	B	A	B	A	B	B	A	A	B	A	A	B	B	A	A	B	B	B	A	A	A	B	A	B	B	B	B	B	B	A	A	B	A	A	A	A	A	A	A	B	B	B
chr3_63571932	chr3	63571932	B	B	B	A	A	B	A	B	A	B	B	A	A	B	A	A	B	B	A	A	B	B	B	A	A	A	B	A	B	B	B	B	B	B	A	A	B	A	A	A	A	A	A	A	B	B	B
chr3_64224666	chr3	64224666	B	B	B	A	A	B	A	B	A	B	B	A	A	B	A	A	B	B	A	A	B	B	B	A	A	A	B	A	B	B	B	B	B	B	A	A	B	A	A	A	A	A	A	A	A	B	B
chr3_64702486	chr3	64702486	B	B	B	A	A	B	A	B	A	B	B	A	A	B	A	A	B	B	A	A	B	B	B	A	A	A	B	A	B	B	B	B	B	B	A	A	B	A	A	A	A	A	A	A	A	B	B
chr3_64777983	chr3	64777983	B	B	B	A	A	B	A	B	A	B	B	B	A	B	A	A	B	B	A	A	B	B	B	A	A	A	B	A	B	B	B	B	B	B	A	A	B	A	A	B	A	A	A	A	B	B	B
chr3_65114706	chr3	65114706	B	B	B	A	A	A	A	B	A	B	B	B	A	B	A	A	B	B	A	A	B	B	B	A	A	A	B	A	B	B	B	B	B	B	A	A	B	A	A	B	H	A	A	A	B	B	B
chr3_65163119	chr3	65163119	B	B	B	A	A	A	A	B	A	B	B	B	A	B	A	A	B	A	A	A	B	B	B	A	A	A	B	A	B	B	B	B	B	B	A	A	B	A	A	B	A	A	A	A	B	B	B
chr3_65433865	chr3	65433865	B	B	B	A	A	A	A	B	A	B	B	A	A	B	A	A	B	A	A	A	B	A	B	A	A	A	B	A	B	B	B	B	B	B	A	A	B	A	A	*	A	A	A	A	A	B	B
chr3_65482025	chr3	65482025	B	B	B	A	A	A	A	B	A	B	B	A	A	B	A	A	B	A	A	A	B	A	B	A	A	A	B	A	B	B	B	B	B	B	A	A	B	A	A	B	A	A	A	A	A	B	B
chr3_65646355	chr3	65646355	B	B	B	A	A	A	A	B	A	B	B	B	A	B	A	A	B	A	A	A	B	A	B	A	A	A	B	A	B	B	B	B	B	B	A	A	B	A	A	*	A	A	A	A	A	B	B
chr3_69873672	chr3	69873672	B	B	B	A	A	A	A	B	A	B	A	A	A	B	A	A	A	B	A	B	B	B	B	A	A	A	B	A	B	A	B	B	A	B	B	A	B	A	A	A	B	A	B	A	A	B	B
chr3_70227477	chr3	70227477	B	B	B	A	A	A	A	B	A	B	A	A	A	B	A	A	A	B	A	B	B	B	B	A	A	A	B	A	B	A	B	B	A	B	B	B	B	A	A	*	B	A	B	A	A	B	B
chr3_71739751	chr3	71739751	B	B	B	A	A	A	A	B	A	B	A	A	A	B	A	A	A	B	A	B	B	B	B	A	A	A	B	A	B	H	A	B	B	B	B	B	B	A	A	A	B	A	B	A	A	A	B
chr3_71918623	chr3	71918623	B	B	B	A	A	A	A	B	A	B	A	A	A	B	A	A	A	B	A	B	B	B	B	A	A	A	A	A	B	A	A	B	B	B	B	B	B	A	A	B	B	A	B	A	A	A	B
chr3_71975013	chr3	71975013	B	B	B	A	A	A	A	B	A	B	A	*	A	B	A	A	A	B	A	B	B	B	B	A	A	A	A	A	B	A	A	B	B	B	B	B	B	A	A	B	B	A	B	A	A	A	B
chr3_72768333	chr3	72768333	A	B	B	A	A	A	A	B	A	B	A	A	A	B	B	A	A	B	B	B	B	B	B	A	A	A	A	A	B	A	A	B	B	B	B	B	B	A	A	B	B	A	B	A	A	A	B
chr3_72750485	chr3	72750485	A	B	B	A	A	A	A	B	A	B	A	A	A	B	B	A	A	B	B	B	B	B	B	A	A	A	A	A	B	A	A	B	B	B	B	B	B	A	A	B	B	A	B	A	A	A	B
chr3_72968014	chr3	72968014	A	B	B	A	A	A	A	B	A	B	A	B	A	B	B	A	A	B	A	B	B	B	B	A	A	A	A	A	B	A	A	B	B	B	B	B	B	A	A	B	B	A	B	A	B	A	B
chr3_73055211	chr3	73055211	A	H	B	A	A	A	A	B	A	B	A	B	A	B	B	A	A	B	A	B	B	B	B	A	A	A	A	A	B	B	H	B	B	B	B	B	B	A	A	*	B	A	B	A	B	A	B
chr3_73704651	chr3	73704651	A	B	B	H	A	A	A	B	A	B	A	A	A	B	B	A	A	B	A	B	B	B	B	A	A	A	A	B	B	B	A	B	B	B	B	B	B	A	A	B	B	A	B	A	B	B	B
chr3_73804405	chr3	73804405	A	B	A	H	A	A	A	B	A	B	A	A	A	B	B	A	A	B	A	B	B	B	B	A	A	A	A	B	B	B	A	B	B	B	B	B	B	A	A	B	B	A	H	A	B	B	B
chr3_73861135	chr3	73861135	A	B	A	B	A	A	A	B	A	B	A	A	A	B	B	A	A	B	A	B	B	B	B	A	A	A	A	B	B	B	A	B	B	B	B	B	B	A	A	B	B	A	H	A	B	B	B
chr3_73895990	chr3	73895990	A	B	A	B	A	A	A	B	A	B	A	A	A	B	B	A	A	B	A	B	A	B	B	A	A	A	A	B	B	B	A	B	B	B	B	B	B	A	A	B	B	A	B	A	B	B	B
chr3_74055203	chr3	74055203	A	B	A	B	A	A	A	B	A	B	A	A	A	B	B	A	A	B	A	B	A	B	B	A	A	A	A	B	B	B	A	B	B	B	B	B	B	A	A	A	B	A	H	A	B	B	B
chr3_74381019	chr3	74381019	A	B	A	B	A	A	A	B	A	*	A	A	A	B	B	A	A	B	A	B	B	B	B	A	A	A	A	B	*	B	A	B	B	B	B	B	B	A	A	A	B	A	A	H	B	B	B
chr4_779257	chr4	779257	A	A	A	B	A	A	A	B	A	B	A	A	A	B	B	A	B	B	B	A	B	B	A	A	B	B	B	A	B	A	B	B	B	A	B	B	A	A	A	A	A	A	A	B	A	A	B
chr4_1244587	chr4	1244587	A	A	A	B	A	B	A	B	B	B	A	A	A	B	B	A	B	B	B	A	B	B	A	A	B	B	A	A	A	A	A	B	B	A	B	B	A	A	*	A	A	A	A	B	*	A	B
chr4_1288374	chr4	1288374	A	A	A	H	A	B	A	B	A	B	A	A	A	B	B	A	B	B	B	A	B	B	A	A	B	B	A	A	A	A	A	B	B	A	B	B	A	A	*	A	A	A	A	B	*	A	B
chr4_1903522	chr4	1903522	A	A	A	B	A	B	A	B	A	B	A	A	A	B	B	A	B	B	B	A	B	B	A	A	B	B	A	A	A	A	A	B	B	A	B	B	A	A	B	A	A	B	A	B	B	A	B
chr4_2297658	chr4	2297658	A	A	A	B	A	B	A	B	A	B	A	A	A	B	A	A	B	B	B	A	B	B	B	A	B	B	A	A	A	A	A	B	B	A	B	B	A	A	B	B	A	B	A	B	B	A	B
chr4_2719123	chr4	2719123	A	A	A	B	B	B	A	B	A	B	A	A	B	B	A	A	B	B	B	A	B	B	B	A	B	*	A	A	A	A	A	B	B	A	B	B	A	A	*	*	A	B	A	B	*	A	B
chr4_2917858	chr4	2917858	A	A	A	B	B	B	A	B	A	B	A	A	B	B	A	H	B	B	B	B	B	B	B	A	B	A	A	A	A	A	A	B	B	A	B	B	A	A	A	A	A	B	A	B	A	A	B
chr4_3905366	chr4	3905366	A	A	A	B	B	B	A	B	A	B	A	A	B	H	A	H	B	B	B	A	B	B	B	A	B	A	A	A	A	A	A	B	B	A	B	B	A	A	A	A	A	B	A	B	A	A	B
chr4_3875400	chr4	3875400	A	A	A	B	B	B	A	B	A	B	A	A	B	B	A	A	B	B	B	A	B	B	B	A	B	A	A	A	A	A	A	B	B	A	B	B	A	A	A	A	A	B	A	B	A	A	B
chr4_4251471	chr4	4251471	A	A	A	B	B	B	H	B	A	B	A	A	B	B	A	H	B	B	B	A	B	B	B	A	B	A	A	A	A	A	A	B	B	A	B	B	A	A	A	A	A	B	A	B	A	A	B
chr4_4321297	chr4	4321297	A	A	A	B	B	B	A	B	A	B	A	A	B	B	A	H	B	B	B	A	B	B	B	A	B	A	A	A	H	A	A	B	B	A	B	B	A	A	A	A	A	B	A	B	A	A	B
chr4_4339484	chr4	4339484	A	A	A	B	B	B	A	B	A	A	A	A	B	B	A	H	B	B	B	A	B	B	B	A	B	A	A	A	H	A	A	B	B	A	B	B	A	A	A	A	A	B	A	B	B	A	B
chr4_4670621	chr4	4670621	A	A	A	B	B	B	A	B	A	A	A	A	B	B	A	H	B	B	B	A	B	B	B	A	B	A	A	A	H	B	A	B	B	A	B	B	A	A	A	A	A	B	A	B	B	A	B
chr4_4751221	chr4	4751221	A	A	A	B	B	B	A	B	A	A	A	A	B	B	A	A	B	B	B	A	B	B	B	A	B	A	A	A	H	B	A	B	B	A	B	B	A	A	A	A	A	B	A	B	A	A	B
chr4_5028816	chr4	5028816	A	A	A	B	B	B	A	B	A	A	A	A	B	B	A	H	B	B	B	A	B	B	B	A	B	A	A	A	H	B	A	B	B	A	B	B	A	A	A	A	A	B	A	B	A	A	B
chr4_5140619	chr4	5140619	A	A	A	B	B	B	A	B	A	A	A	A	B	B	A	H	B	B	B	A	B	B	B	A	B	A	A	A	H	B	A	B	B	A	B	B	A	A	A	A	A	B	A	B	A	A	B
chr4_5577932	chr4	5577932	A	A	A	B	B	B	A	B	A	A	B	A	B	B	A	H	B	A	B	A	B	B	B	A	B	A	A	A	H	B	A	B	B	A	B	B	A	A	A	A	A	B	A	B	A	A	B
chr4_5634041	chr4	5634041	A	A	A	B	B	B	A	B	A	A	B	A	B	H	A	H	B	A	B	A	B	B	B	A	B	A	A	A	H	B	A	B	B	A	B	B	A	A	A	A	A	B	A	B	A	A	B
chr4_5925957	chr4	5925957	A	A	A	B	B	A	A	B	A	A	B	A	B	H	A	H	B	A	B	A	B	B	B	A	B	A	A	A	H	B	A	B	B	A	B	B	A	A	A	A	A	B	A	B	A	A	B
chr4_6031490	chr4	6031490	A	A	A	B	B	A	A	B	A	A	B	A	B	B	B	H	B	A	B	A	B	B	B	A	B	A	A	A	A	B	A	B	B	A	B	B	A	A	A	A	A	B	A	B	A	A	B
chr4_6098744	chr4	6098744	A	A	A	B	B	A	A	B	A	A	B	A	B	B	B	A	B	A	B	A	B	B	B	A	B	A	A	A	H	B	A	B	B	A	B	B	A	A	A	A	A	B	A	B	*	A	B
chr4_6147478	chr4	6147478	A	A	A	B	B	A	A	B	A	A	B	A	B	B	B	A	B	A	B	A	B	B	B	A	B	B	A	A	H	B	A	B	B	A	B	B	A	A	B	B	A	B	A	B	A	A	B
chr4_6173269	chr4	6173269	A	A	A	B	B	A	A	B	A	A	B	A	B	B	B	H	B	A	B	A	B	B	B	A	B	B	A	A	H	B	A	B	B	A	B	B	A	A	B	B	A	B	A	B	A	A	B
chr4_6531825	chr4	6531825	A	B	A	B	B	A	A	B	A	A	B	A	B	B	B	H	B	A	B	B	B	B	B	A	B	A	A	B	H	B	A	B	B	A	B	A	A	A	A	A	A	B	A	B	A	A	B
chr4_6889598	chr4	6889598	A	B	A	B	B	A	A	B	A	A	B	A	B	B	B	H	B	A	B	A	B	B	B	A	B	A	A	B	H	B	A	B	B	A	B	A	A	A	A	A	A	B	A	B	A	A	B
chr4_7291793	chr4	7291793	A	B	A	B	B	A	B	B	A	A	B	A	B	B	B	A	B	A	B	A	B	B	B	A	B	A	A	B	A	H	A	B	B	A	B	B	A	A	A	A	A	B	A	B	A	A	A
chr4_7632676	chr4	7632676	A	B	A	B	B	A	B	B	A	A	B	A	B	B	B	A	B	B	B	A	B	B	B	A	A	A	A	B	A	B	A	B	B	A	B	B	A	A	A	A	A	B	A	B	A	A	A
chr4_8021387	chr4	8021387	A	B	A	B	B	A	B	B	A	A	B	H	B	B	B	H	B	B	A	A	B	B	B	A	A	A	A	B	A	B	A	H	B	A	B	B	A	A	A	A	A	B	A	B	A	A	A
chr4_8132511	chr4	8132511	A	B	A	B	B	A	B	B	A	A	B	A	B	A	B	H	B	B	A	A	B	B	B	A	A	*	A	B	A	H	A	H	B	A	B	B	A	A	A	B	A	B	A	B	B	A	A
chr4_8525216	chr4	8525216	A	B	B	B	B	A	B	B	A	B	B	A	B	H	B	A	B	B	A	A	B	B	B	A	A	B	A	B	A	H	A	B	A	A	B	B	A	A	A	B	A	B	A	B	A	A	A
chr4_8664399	chr4	8664399	A	H	B	B	B	A	B	B	A	A	B	A	B	A	A	A	B	A	A	A	B	A	B	A	A	*	B	B	A	B	A	B	A	A	B	B	A	A	A	B	A	H	A	B	A	A	A
chr4_8805941	chr4	8805941	A	B	B	B	B	A	B	B	A	A	B	A	B	A	A	H	B	A	A	A	B	B	B	A	A	*	B	B	A	B	A	B	A	A	B	B	A	A	A	B	A	B	A	B	A	A	A
chr4_8925474	chr4	8925474	A	B	B	B	B	A	B	B	A	A	B	A	B	A	A	H	B	A	A	A	B	B	B	A	A	A	B	B	A	B	A	B	A	A	B	B	A	A	A	B	A	B	A	B	A	A	A
chr4_9026400	chr4	9026400	A	B	B	H	B	A	B	B	A	A	B	A	B	A	A	H	B	A	A	A	B	B	B	A	A	*	B	B	A	B	*	B	B	A	B	B	A	A	A	B	A	B	A	B	B	A	A
chr4_9129185	chr4	9129185	A	B	B	A	B	A	B	B	A	A	B	A	B	A	A	A	B	A	A	A	B	B	B	A	A	*	B	B	A	B	A	B	B	A	B	B	A	A	A	B	A	B	A	B	B	A	A
chr4_9508504	chr4	9508504	A	B	B	A	B	A	B	B	A	A	B	A	B	A	A	H	B	A	A	A	B	A	B	A	A	*	B	B	A	B	A	B	A	A	B	B	A	A	A	B	A	B	A	A	A	A	A
chr4_9560774	chr4	9560774	B	B	B	A	B	A	B	B	A	A	B	A	B	A	A	B	B	A	A	A	B	A	B	A	A	*	B	B	A	B	A	B	A	A	B	B	A	A	A	A	A	B	A	A	A	A	A
chr4_10281731	chr4	10281731	H	B	B	H	B	A	B	B	A	A	B	A	B	H	A	B	B	A	A	A	B	*	B	A	A	*	B	B	A	B	A	B	*	A	B	B	A	A	A	*	A	B	A	A	*	A	A
chr4_10372512	chr4	10372512	H	B	B	A	B	A	B	B	A	A	B	A	B	H	A	B	B	A	A	A	B	B	B	A	A	B	B	B	A	B	A	B	B	A	B	B	A	A	A	B	A	B	A	A	B	A	A
chr4_10468187	chr4	10468187	H	B	B	A	B	A	B	B	A	A	B	A	B	H	A	B	B	A	*	A	B	B	B	A	A	B	H	B	A	B	A	B	B	A	B	B	A	A	*	A	A	B	A	A	B	A	A
chr4_12109720	chr4	12109720	H	B	B	A	B	A	B	B	A	A	H	A	B	A	A	B	B	A	A	A	B	B	B	A	A	A	H	B	A	B	A	B	B	A	A	B	A	A	A	*	A	B	A	A	B	A	A
chr4_12516918	chr4	12516918	H	B	B	A	B	A	B	B	B	A	B	*	B	A	A	B	B	A	A	A	B	*	B	A	A	A	H	B	A	B	A	B	*	A	A	B	B	A	A	A	A	B	A	A	*	A	B
chr4_46326173	chr4	46326173	H	B	B	A	B	A	B	B	*	A	H	B	B	A	A	B	B	A	A	A	B	*	A	A	A	*	H	B	A	B	A	B	*	A	A	B	*	A	A	A	A	B	B	A	*	A	B
chr4_48600523	chr4	48600523	B	B	B	A	B	A	B	B	A	A	H	B	B	A	A	B	B	A	A	A	B	B	A	A	A	A	H	B	A	B	A	B	B	A	B	B	A	A	A	A	A	B	B	A	B	A	B
chr4_50085398	chr4	50085398	B	B	B	A	B	A	B	B	A	A	H	B	B	A	A	B	B	A	A	A	B	A	A	A	A	A	A	B	A	B	A	B	A	A	B	B	A	A	B	A	A	B	B	A	B	A	B
chr4_50511829	chr4	50511829	B	B	B	A	H	A	B	B	A	A	H	*	B	A	A	B	B	A	B	A	B	B	B	A	A	*	A	B	A	H	A	B	B	A	B	B	A	A	B	*	A	A	A	A	B	A	B
chr4_50827291	chr4	50827291	B	B	B	H	B	A	B	B	A	A	H	A	B	A	A	B	B	A	B	A	B	B	B	A	A	*	A	B	A	B	A	B	*	A	H	B	A	A	B	*	A	A	A	A	B	A	B
chr4_51425851	chr4	51425851	B	B	B	A	B	A	B	B	A	A	H	B	B	A	A	B	B	A	B	A	B	B	B	A	A	B	A	B	A	B	A	B	B	B	H	A	A	A	B	B	A	A	A	A	B	A	B
chr4_53069045	chr4	53069045	B	B	B	A	B	A	B	B	A	A	A	B	B	A	A	B	B	A	B	A	B	B	B	A	A	A	A	B	A	B	A	B	B	A	A	A	A	A	B	A	B	A	B	A	B	A	B
chr4_53091024	chr4	53091024	B	B	B	A	B	B	B	B	A	A	A	A	B	A	A	B	B	A	B	A	B	B	B	A	A	A	A	B	A	B	A	B	B	A	A	A	B	A	B	A	B	A	B	A	B	A	B
chr4_53322829	chr4	53322829	B	B	B	H	B	B	B	A	A	A	A	*	B	A	A	B	B	A	B	A	B	B	B	A	A	B	A	B	A	B	A	A	B	A	A	A	B	A	B	A	B	A	B	A	H	A	B
chr4_53400458	chr4	53400458	B	B	B	A	B	B	B	A	A	A	A	*	B	A	A	B	B	A	B	A	B	B	B	A	A	B	A	B	A	B	A	A	B	A	A	A	B	A	B	A	B	A	B	A	H	A	B
chr4_53207937	chr4	53207937	B	B	B	H	B	B	B	A	A	A	A	A	B	A	A	B	B	A	B	A	B	B	B	A	A	B	A	B	A	B	A	A	B	A	A	A	B	A	B	A	B	A	B	A	H	A	B
chr4_53625996	chr4	53625996	B	B	B	H	B	B	B	A	A	A	A	A	B	A	A	B	B	A	B	A	B	B	B	A	A	B	A	B	A	B	A	A	B	A	A	A	B	A	B	B	B	A	B	A	B	A	B
chr4_53732038	chr4	53732038	B	B	B	B	B	B	B	A	A	A	A	A	B	A	A	B	B	A	B	A	B	B	B	A	A	B	A	B	A	H	*	A	B	A	A	A	B	A	B	*	B	A	B	A	B	A	A
chr4_53824077	chr4	53824077	B	B	B	B	B	B	B	A	A	A	A	A	B	A	B	B	B	A	B	A	B	B	B	A	A	B	A	B	A	B	A	A	B	A	A	A	B	A	B	B	B	A	A	A	B	A	A
chr4_53848645	chr4	53848645	A	B	B	B	B	B	B	A	A	A	A	A	B	A	B	B	B	A	B	A	B	B	B	A	A	B	A	B	A	B	A	A	B	A	A	A	B	A	B	B	B	A	A	A	B	A	A
chr4_54276866	chr4	54276866	A	B	B	B	B	B	B	A	A	A	A	A	B	A	B	B	B	A	B	A	B	B	B	A	A	B	A	B	A	B	A	A	B	A	A	A	B	A	B	*	B	A	A	A	B	A	A
chr4_55477014	chr4	55477014	A	B	B	B	B	B	B	A	A	A	A	A	B	A	A	B	B	A	B	A	B	B	B	A	A	A	A	B	A	B	A	A	B	A	A	A	B	A	A	B	B	A	A	A	H	A	A
chr4_56244782	chr4	56244782	A	B	B	B	B	A	B	A	A	A	A	A	B	A	A	B	B	A	B	A	B	B	B	A	A	B	A	B	A	B	A	A	B	A	A	A	B	A	B	B	B	A	A	A	H	A	A
chr4_56231666	chr4	56231666	A	B	B	B	B	A	B	A	A	A	A	A	B	A	A	B	B	A	B	A	B	B	B	A	A	B	A	B	A	H	A	A	B	A	A	A	B	A	B	B	B	A	A	A	H	A	A
chr4_56381110	chr4	56381110	A	B	B	B	B	A	B	A	A	A	A	A	B	A	A	B	B	A	B	A	B	B	B	A	A	B	A	B	A	B	A	A	B	B	A	A	B	A	B	B	B	A	A	A	B	A	A
chr4_56502662	chr4	56502662	A	B	B	B	B	A	B	A	A	A	A	A	B	A	A	B	B	A	B	A	B	B	B	A	A	B	A	B	A	B	A	A	B	B	A	A	B	A	B	B	B	A	A	A	B	A	A
chr4_57087101	chr4	57087101	A	B	B	B	B	A	B	A	A	A	A	A	B	A	A	B	B	A	B	A	B	*	B	A	A	B	B	B	A	B	A	A	B	B	A	A	B	A	B	B	B	A	A	A	B	B	A
chr4_57160460	chr4	57160460	A	B	B	B	B	A	B	A	A	A	A	A	B	A	A	B	B	A	B	A	B	B	B	A	A	B	B	B	A	H	A	A	B	B	A	A	B	A	B	B	B	A	A	A	B	B	A
chr4_57599961	chr4	57599961	A	B	B	B	B	A	B	A	A	A	A	A	B	A	A	B	B	A	B	A	B	B	B	A	A	A	B	B	A	H	A	A	B	B	A	A	B	A	A	B	B	A	A	A	B	B	A
chr4_57807471	chr4	57807471	A	B	B	B	B	A	B	A	A	A	A	A	B	A	A	B	B	A	B	A	B	B	B	A	A	B	B	B	A	B	A	A	B	B	A	A	B	A	B	B	B	A	A	A	B	B	A
chr4_58834325	chr4	58834325	B	B	B	B	B	A	B	A	A	A	A	A	B	A	A	B	B	A	B	A	B	B	B	B	A	B	B	B	A	B	A	A	B	B	A	A	B	A	B	B	B	A	A	A	B	A	A
chr4_59160099	chr4	59160099	B	B	B	B	B	A	B	A	A	A	A	A	B	A	A	B	B	A	B	A	B	B	B	B	A	B	B	B	A	B	A	A	B	B	A	A	B	A	B	B	B	A	A	A	B	A	A
chr4_60817704	chr4	60817704	B	B	B	B	B	A	B	A	A	A	A	A	B	A	A	B	B	A	B	A	B	B	B	B	A	B	B	B	A	H	A	A	B	B	A	A	B	A	B	B	B	A	A	A	B	A	A
chr4_59564904	chr4	59564904	B	B	A	B	B	A	B	A	A	A	A	A	B	A	A	B	B	A	B	A	B	B	B	B	A	A	B	B	A	B	A	A	B	B	A	A	B	A	A	B	B	A	A	A	B	A	A
chr4_59750124	chr4	59750124	B	B	A	B	B	A	B	A	A	A	A	A	B	A	A	B	B	A	B	A	B	B	B	B	A	B	B	B	A	B	A	A	B	B	A	A	B	A	B	B	B	A	A	A	B	A	A
chr4_60721157	chr4	60721157	B	B	A	B	B	A	B	A	A	A	A	A	B	A	A	B	B	A	B	A	B	B	B	B	A	B	B	B	A	B	A	A	B	B	A	A	B	A	B	B	B	A	A	A	B	A	A
chr4_60498580	chr4	60498580	B	B	A	B	B	A	B	A	A	A	A	A	B	A	A	B	B	A	B	A	B	B	B	B	A	B	B	B	A	B	A	A	B	B	A	A	B	A	B	B	B	A	A	A	B	A	A
chr4_61121539	chr4	61121539	B	B	A	B	B	A	B	A	A	A	A	A	B	A	A	B	B	A	B	A	B	B	B	B	A	B	B	B	A	B	A	A	B	B	A	A	B	A	B	B	B	A	A	A	B	A	A
chr4_61188292	chr4	61188292	B	B	A	B	B	A	B	A	A	A	A	A	B	A	A	B	B	A	B	A	B	B	B	B	A	B	B	B	A	B	A	A	B	B	A	A	B	A	B	B	B	A	A	A	B	A	A
chr4_61201809	chr4	61201809	B	B	A	B	B	A	B	B	A	A	A	A	B	A	A	B	B	A	B	A	B	B	B	B	A	B	B	B	A	B	A	A	B	B	A	A	B	A	B	B	B	A	A	A	B	A	A
chr4_61396582	chr4	61396582	B	B	A	B	B	A	B	B	A	A	A	A	B	A	A	B	B	A	B	A	B	B	B	B	A	B	B	B	A	B	A	A	B	B	A	A	B	A	B	B	B	A	A	A	B	A	A
chr4_62276892	chr4	62276892	B	B	A	A	B	A	B	B	A	A	B	A	B	A	A	B	B	A	B	A	B	B	B	B	A	B	B	B	*	B	A	B	B	B	A	A	B	A	B	B	B	A	A	A	H	A	A
chr4_62891569	chr4	62891569	B	B	A	H	B	A	B	B	A	A	B	A	B	A	A	B	B	A	B	B	B	B	A	B	A	B	B	B	A	B	A	B	B	B	A	A	B	A	B	B	B	A	A	B	B	A	A
chr4_62925715	chr4	62925715	B	B	A	A	B	A	B	B	A	A	B	A	B	A	A	B	B	A	B	B	B	B	A	B	A	A	B	B	A	B	A	B	B	B	A	A	B	A	A	B	B	A	A	B	H	A	A
chr4_62960885	chr4	62960885	B	B	A	A	B	B	B	B	A	A	B	A	B	A	A	B	B	A	B	B	B	B	A	B	A	B	B	B	A	B	A	B	B	B	A	A	B	A	B	B	B	A	A	B	H	A	A
chr4_62796954	chr4	62796954	B	B	A	H	B	B	B	B	A	A	B	A	B	A	A	B	B	A	B	B	B	H	A	B	A	B	B	B	A	B	A	B	B	B	A	A	B	A	B	B	B	A	A	B	H	A	A
chr4_63167291	chr4	63167291	B	B	A	H	B	B	B	B	A	A	B	A	B	A	A	B	B	A	B	B	B	B	A	B	A	B	B	B	A	B	A	B	B	B	A	A	B	B	B	B	B	A	A	B	B	A	A
chr4_63784970	chr4	63784970	B	B	A	H	B	B	B	B	A	A	B	A	B	A	A	B	B	A	B	B	B	B	A	B	A	B	B	B	B	B	B	B	B	B	A	A	B	B	A	B	B	A	A	B	H	A	A
chr4_63833363	chr4	63833363	B	B	A	H	B	B	B	B	A	A	B	A	B	A	A	B	B	A	B	B	B	B	A	B	A	B	B	B	B	B	B	B	B	B	A	A	B	B	H	B	B	A	A	B	H	A	A
chr4_64259365	chr4	64259365	B	B	A	A	B	B	B	B	A	A	B	A	B	A	A	B	B	A	B	B	B	B	A	B	A	B	B	B	B	B	B	B	B	B	A	A	B	B	*	B	B	A	A	B	H	A	A
chr4_64434864	chr4	64434864	B	B	A	A	B	B	B	B	A	A	A	A	B	A	A	B	B	A	B	B	B	B	A	B	A	B	B	B	B	B	B	B	B	B	A	A	B	B	A	B	B	B	A	B	H	A	A
chr4_64542370	chr4	64542370	B	B	A	A	B	B	B	B	A	A	A	A	B	A	A	B	B	A	B	B	B	B	A	B	A	B	B	B	B	B	B	B	B	B	A	A	B	B	A	A	B	B	A	B	H	A	A
chr4_65433305	chr4	65433305	B	B	A	H	B	B	B	B	A	A	A	A	B	A	A	B	B	A	B	B	B	B	A	B	A	B	B	B	B	B	B	B	B	B	A	A	B	B	B	A	B	B	A	B	H	A	A
chr4_64721137	chr4	64721137	B	B	A	H	B	B	B	B	A	A	A	A	B	A	A	B	B	A	B	B	B	B	A	B	A	A	B	B	B	B	B	B	A	B	A	A	B	B	B	B	B	B	B	B	H	A	A
chr4_65488064	chr4	65488064	B	B	A	A	B	B	B	B	A	A	A	A	B	A	A	B	B	A	B	B	B	B	A	B	A	A	B	B	B	B	B	B	H	B	A	A	B	B	B	A	B	B	B	B	H	A	A
chr4_65538885	chr4	65538885	B	B	A	A	B	B	B	B	A	A	A	A	B	A	A	B	B	A	B	B	B	B	A	B	A	A	B	B	B	B	B	B	H	B	A	A	B	B	B	A	B	B	B	B	H	A	A
chr4_65557217	chr4	65557217	B	B	A	H	B	B	B	B	A	A	A	A	B	A	A	B	B	A	B	B	B	B	A	B	A	A	B	B	B	B	B	B	H	B	A	A	B	B	A	A	B	B	B	B	H	A	A
chr4_65678267	chr4	65678267	B	B	A	A	B	B	B	B	A	A	A	A	B	A	A	B	B	A	B	B	B	B	A	B	A	A	B	B	B	B	B	B	H	B	A	A	B	B	*	A	B	A	B	B	H	A	A
chr4_65718423	chr4	65718423	B	B	A	A	B	B	B	B	A	A	A	A	B	A	A	B	B	A	B	B	B	B	A	B	A	A	B	B	B	B	B	B	H	B	A	A	B	B	*	A	B	A	B	B	H	A	A
chr4_66471472	chr4	66471472	B	B	B	A	B	B	B	B	A	A	A	A	B	A	A	B	B	A	B	B	B	B	A	B	A	A	B	B	B	B	B	B	B	B	A	A	B	B	B	A	B	A	B	B	A	A	A
chr4_66441587	chr4	66441587	B	B	B	A	B	B	B	B	A	A	A	A	B	A	A	B	B	A	B	B	B	B	A	B	A	A	B	B	B	B	B	B	H	B	A	A	B	B	B	A	B	A	B	B	A	A	A
chr4_66540344	chr4	66540344	B	B	B	A	B	B	B	B	A	A	H	A	B	A	A	B	B	A	B	B	B	B	A	B	A	A	B	B	B	B	B	B	H	B	A	A	B	B	B	A	B	A	B	B	A	A	A
chr4_67472802	chr4	67472802	B	B	B	A	B	A	B	B	A	A	H	A	B	A	A	B	A	A	B	B	B	B	A	B	A	A	B	B	A	B	A	B	B	B	A	A	B	B	A	*	B	A	B	B	*	A	A
chr4_67964385	chr4	67964385	B	B	B	A	B	A	B	B	A	A	H	A	B	A	A	B	A	A	B	B	B	B	A	B	A	A	B	B	A	B	A	B	H	B	A	A	B	B	A	B	B	A	B	B	A	A	A
chr4_67852722	chr4	67852722	B	B	B	A	B	A	B	B	A	A	H	A	B	A	A	B	A	A	B	B	B	B	A	B	A	A	B	B	A	B	A	B	H	B	A	A	B	B	A	B	B	A	B	B	A	A	A
chr5_139496	chr5	139496	B	A	A	B	A	A	A	A	A	B	B	A	A	B	B	H	B	A	A	A	A	B	B	A	B	A	B	B	H	B	A	B	A	A	A	A	B	A	A	A	B	B	B	A	B	B	A
chr5_182953	chr5	182953	B	A	A	B	A	A	A	A	A	B	B	A	A	B	B	B	B	A	A	A	A	B	B	A	B	A	B	B	H	B	A	B	A	A	A	A	B	A	A	*	B	B	B	A	B	B	A
chr5_319496	chr5	319496	B	A	A	B	A	A	A	A	A	B	B	A	A	B	B	B	B	A	A	A	A	B	B	A	B	A	B	B	H	B	A	B	A	A	A	A	B	A	A	B	B	B	B	A	B	B	A
chr5_446270	chr5	446270	B	A	A	B	A	A	A	A	A	B	B	A	A	B	B	H	B	A	A	A	A	B	B	A	B	H	B	B	H	B	A	B	A	A	A	A	B	A	B	*	B	B	B	A	B	B	A
chr5_1025330	chr5	1025330	B	A	A	B	A	A	B	A	A	B	B	A	A	B	B	H	B	A	A	A	A	B	B	A	B	H	B	B	H	B	A	B	A	A	A	A	B	A	B	B	B	B	B	A	B	B	B
chr5_1450246	chr5	1450246	B	A	A	H	A	A	B	A	A	B	B	A	A	B	B	H	B	A	A	A	A	B	B	A	B	H	B	B	H	B	A	B	A	A	A	A	B	A	A	B	B	A	B	A	B	B	B
chr5_1472837	chr5	1472837	B	A	A	B	A	A	B	A	A	B	B	A	A	H	B	B	B	A	A	A	A	B	B	A	B	B	B	B	H	B	A	B	A	A	A	A	B	A	A	B	B	A	B	A	B	B	B
chr5_1586577	chr5	1586577	B	A	A	B	B	A	B	A	A	B	B	A	B	A	B	B	B	A	A	A	A	B	H	A	B	H	B	B	H	B	A	B	A	A	A	A	B	A	B	B	B	A	B	A	B	B	B
chr5_1628214	chr5	1628214	B	A	A	B	B	A	B	A	A	B	B	A	B	A	B	B	B	A	A	A	A	B	H	A	B	H	B	B	H	B	A	B	A	A	A	A	B	A	*	*	B	A	B	A	B	B	B
chr5_1749900	chr5	1749900	B	A	A	B	B	A	B	A	A	B	B	A	B	A	B	B	B	A	A	A	A	B	H	A	B	H	B	B	H	B	A	B	A	A	A	A	B	A	B	B	B	A	B	A	B	B	A
chr5_1980982	chr5	1980982	B	A	A	B	B	A	B	A	A	B	B	A	B	A	B	B	B	A	A	A	A	B	B	A	B	H	B	B	H	B	A	B	A	A	A	A	B	A	A	B	A	A	B	A	B	B	A
chr5_2013131	chr5	2013131	B	A	A	B	B	B	B	A	A	B	B	A	B	A	B	B	B	A	A	A	A	B	B	A	B	H	B	B	H	B	A	B	A	A	B	A	B	A	A	B	A	A	B	A	B	B	A
chr5_2053077	chr5	2053077	B	A	A	B	B	B	B	A	A	B	B	A	B	A	B	B	B	A	A	A	A	B	B	A	B	A	B	B	H	B	A	B	A	A	B	A	B	A	*	B	A	A	B	A	B	B	A
chr5_2254553	chr5	2254553	B	A	A	B	B	B	B	A	A	B	B	A	B	A	B	B	B	A	A	A	A	B	B	A	B	A	B	B	H	B	A	B	A	A	B	A	B	A	*	B	A	A	B	A	B	B	A
chr5_2580041	chr5	2580041	B	A	B	B	B	B	B	A	A	B	B	A	B	A	B	B	B	A	A	A	A	B	B	A	B	H	B	B	H	B	A	B	A	A	B	A	B	A	B	B	A	A	B	A	B	B	A
chr5_2624928	chr5	2624928	B	A	B	B	B	B	B	A	A	B	B	A	B	A	B	B	B	A	A	A	A	B	B	A	B	H	B	B	H	B	A	B	A	A	B	H	B	A	B	B	A	H	B	A	B	B	A
chr5_2666481	chr5	2666481	B	A	B	B	B	B	B	A	A	B	B	A	B	A	B	B	B	A	A	A	A	B	B	A	B	H	B	B	H	B	A	B	A	A	B	A	B	A	B	B	A	A	B	A	B	B	A
chr5_2679473	chr5	2679473	B	A	B	A	B	*	B	A	A	B	A	A	B	A	B	B	B	A	A	A	A	B	B	A	B	H	B	B	H	H	A	A	A	A	B	A	B	A	B	*	A	A	B	A	B	B	A
chr5_2703648	chr5	2703648	B	A	B	A	B	B	B	A	A	B	A	A	B	A	B	B	B	A	A	A	A	B	B	A	B	H	B	B	H	B	A	A	A	A	B	A	B	A	B	A	A	A	B	A	B	B	A
chr5_3067946	chr5	3067946	B	A	B	A	B	B	A	A	A	B	A	A	B	A	B	B	B	A	A	A	A	B	B	A	B	*	B	B	H	B	A	A	B	A	B	A	B	A	*	*	A	B	B	A	*	B	A
chr5_3239516	chr5	3239516	B	A	B	A	B	B	A	A	A	B	A	A	B	A	B	B	B	A	A	A	A	B	B	A	B	*	B	B	H	B	A	A	B	A	B	A	B	A	*	B	A	B	B	A	A	B	A
chr5_3338392	chr5	3338392	B	A	B	H	B	B	A	A	A	B	A	A	B	A	B	B	B	A	A	A	A	B	B	A	B	A	B	B	H	B	A	A	B	A	B	A	B	A	A	B	A	B	B	A	A	B	A
chr5_3578516	chr5	3578516	B	A	B	H	B	B	A	A	A	B	A	B	B	A	B	B	B	A	A	B	A	B	B	A	A	B	B	B	H	B	A	A	A	B	B	A	B	A	B	B	A	A	B	A	A	B	A
chr5_3854832	chr5	3854832	B	A	B	H	B	B	A	A	B	B	A	A	B	A	B	B	B	A	A	B	A	B	B	A	A	B	B	B	A	H	A	A	A	B	B	A	B	A	B	B	A	A	B	A	B	B	A
chr5_3953762	chr5	3953762	B	A	B	A	B	B	A	A	A	B	A	A	B	A	B	B	B	A	A	B	A	B	A	A	A	A	B	B	A	B	A	A	A	B	B	A	B	A	A	B	A	A	B	A	A	B	A
chr5_4092024	chr5	4092024	B	A	B	A	B	B	A	A	A	B	A	A	B	A	B	B	B	A	A	B	A	B	A	A	A	A	B	B	A	B	A	A	A	B	B	A	B	A	B	B	A	A	B	A	A	*	A
chr5_4467973	chr5	4467973	B	A	A	A	B	B	A	A	A	B	A	*	B	A	B	B	A	A	A	B	A	B	A	A	A	A	B	B	A	B	A	A	A	B	B	A	B	A	B	B	A	A	B	A	A	B	A
chr5_4548733	chr5	4548733	B	A	A	A	H	B	A	A	A	B	A	A	B	H	B	B	A	A	A	B	A	B	A	A	A	A	B	B	A	B	A	A	A	B	B	A	B	H	B	B	A	A	B	A	A	B	A
chr5_4827682	chr5	4827682	B	A	A	A	B	B	A	A	A	B	A	*	B	A	B	B	A	A	A	B	A	B	A	A	A	A	B	B	A	H	A	A	A	B	B	A	B	H	A	B	B	A	B	A	A	B	A
chr5_5106543	chr5	5106543	B	A	A	H	B	B	A	A	A	B	A	A	B	A	B	B	A	A	A	B	A	B	A	A	A	A	B	B	A	B	A	A	A	B	B	A	B	H	A	B	B	A	B	A	A	B	B
chr5_5351493	chr5	5351493	B	A	A	A	B	B	A	A	A	B	A	A	B	A	B	B	A	A	A	B	A	B	A	A	A	A	A	B	A	B	A	A	A	B	A	A	B	H	A	*	B	A	B	A	H	B	B
chr5_5820895	chr5	5820895	B	A	A	H	B	B	A	A	A	B	A	A	B	B	B	B	A	A	A	B	A	B	A	A	A	A	*	B	A	B	A	A	A	B	A	A	B	H	A	A	B	A	B	A	A	B	A
chr5_6173612	chr5	6173612	B	A	A	A	B	B	A	A	A	B	A	A	B	B	B	B	A	A	A	B	A	B	A	A	A	A	A	B	A	B	A	A	A	B	A	A	B	H	A	A	B	A	B	A	H	B	A
chr5_6204774	chr5	6204774	B	A	A	A	B	B	A	A	A	B	A	*	B	B	B	B	A	A	A	B	A	B	A	A	A	A	A	B	A	B	A	A	A	A	A	A	B	B	*	A	B	A	B	A	A	B	A
chr5_6906014	chr5	6906014	B	A	A	A	B	B	A	A	*	B	A	*	B	B	B	B	A	A	A	B	A	B	A	A	A	A	A	B	A	H	A	A	A	A	A	A	B	H	*	A	B	A	B	A	A	A	A
chr5_6972255	chr5	6972255	B	A	A	A	B	B	A	A	*	B	A	A	B	B	B	B	A	A	A	B	A	B	A	A	A	A	A	B	A	B	A	A	A	A	A	A	B	H	A	A	B	A	B	A	A	A	A
chr5_8839473	chr5	8839473	B	B	A	A	B	B	A	A	A	B	A	B	B	B	B	B	A	A	B	B	A	B	A	A	A	A	B	B	A	B	B	A	A	A	H	A	A	A	B	A	B	A	B	B	A	A	A
chr5_8867810	chr5	8867810	B	B	A	A	B	B	A	A	B	B	A	B	B	B	B	B	A	A	B	B	A	B	A	A	A	A	B	B	A	B	A	A	A	A	H	A	A	A	B	B	B	A	B	B	H	A	A
chr5_8889099	chr5	8889099	B	B	A	A	B	B	A	A	B	B	A	B	B	H	B	B	A	A	B	B	A	B	A	A	A	A	B	B	A	B	A	A	A	A	H	A	A	A	B	B	B	A	B	B	H	A	A
chr5_9608688	chr5	9608688	B	B	A	A	B	B	A	A	B	B	A	B	B	A	B	B	B	A	B	B	A	B	A	A	A	A	B	B	A	B	*	A	A	A	H	A	A	A	B	B	B	A	B	B	H	A	A
chr5_12108001	chr5	12108001	B	B	A	A	A	B	H	A	*	A	A	*	A	B	B	A	B	A	B	B	A	B	A	A	A	A	B	A	A	A	A	B	A	A	H	A	B	A	*	*	B	A	B	A	A	A	A
chr5_12611756	chr5	12611756	A	B	A	A	A	B	H	A	B	A	A	B	A	B	B	A	B	A	B	B	A	B	A	A	B	A	B	A	A	A	B	B	A	A	H	A	B	A	B	B	B	A	B	A	H	A	A
chr5_12650221	chr5	12650221	A	B	A	A	A	B	H	A	B	A	A	*	A	B	B	A	B	A	B	B	A	B	A	A	B	A	B	A	A	A	B	B	A	A	H	A	B	A	*	B	B	A	B	A	H	A	A
chr5_12922434	chr5	12922434	A	B	A	A	A	B	H	H	*	A	A	*	A	B	B	A	B	A	B	B	A	B	A	A	B	A	B	A	A	A	B	B	A	A	H	A	B	A	*	*	B	A	B	A	A	A	A
chr5_13538330	chr5	13538330	A	B	A	B	H	B	H	A	*	A	A	A	A	B	B	A	B	A	B	B	A	B	A	A	B	A	B	A	A	A	B	B	A	A	H	A	B	A	A	A	B	A	B	A	A	A	A
chr5_13554619	chr5	13554619	A	B	A	B	A	B	*	A	*	A	A	*	A	B	B	A	B	A	B	B	A	B	A	A	B	A	B	A	A	A	B	B	A	A	H	A	B	A	*	A	B	A	B	A	A	A	A
chr5_13744722	chr5	13744722	A	B	A	B	A	B	H	A	*	A	A	A	A	B	B	A	B	A	B	B	A	B	A	A	B	A	B	A	A	A	B	B	A	A	H	A	B	A	A	B	B	A	B	A	A	A	A
chr5_14604766	chr5	14604766	A	B	A	H	A	B	A	A	A	A	A	A	A	B	B	A	B	A	B	B	A	B	A	A	B	A	B	A	A	A	B	B	A	A	H	A	B	A	A	A	B	A	B	A	A	A	A
chr5_16262406	chr5	16262406	A	B	A	H	A	B	H	A	B	A	A	B	A	B	B	A	B	A	B	B	A	B	A	A	B	A	A	A	A	A	B	B	A	A	H	A	B	A	B	A	B	A	B	A	H	A	A
chr5_41139062	chr5	41139062	A	B	A	B	A	B	H	A	B	A	A	A	A	B	B	A	B	A	B	B	A	B	A	A	B	A	A	A	A	A	B	B	A	A	H	A	B	A	A	A	B	A	B	A	H	A	A
chr5_41682528	chr5	41682528	A	B	A	H	A	B	H	A	B	A	*	A	*	B	B	A	B	A	B	B	A	B	A	A	B	A	A	A	A	A	B	B	A	A	H	A	B	A	A	A	B	A	B	A	H	A	A
chr5_45541020	chr5	45541020	A	B	A	B	A	B	A	A	A	A	A	A	A	B	B	A	B	A	B	B	A	B	A	A	B	A	A	A	A	A	B	B	A	A	H	A	B	A	*	A	B	A	B	A	A	A	A
chr5_45715917	chr5	45715917	A	B	A	B	A	B	H	A	B	A	A	A	A	B	B	A	B	A	B	B	A	B	A	A	B	A	A	A	A	A	B	B	A	A	H	A	B	A	A	A	B	A	B	A	H	A	A
chr5_46244642	chr5	46244642	A	B	A	B	B	B	A	A	*	A	A	A	B	A	B	H	B	A	B	B	A	B	A	A	B	A	A	A	A	A	B	B	A	A	H	A	B	A	A	A	B	A	B	A	A	A	A
chr5_46990205	chr5	46990205	A	B	A	B	B	B	H	A	B	A	A	A	B	A	B	A	B	A	B	B	A	B	A	A	B	A	A	A	B	A	B	B	A	A	H	B	B	A	A	A	B	A	B	A	H	A	A
chr5_47144462	chr5	47144462	A	B	A	B	B	B	H	A	B	A	A	A	B	A	B	H	B	A	B	B	A	B	A	A	B	A	A	A	B	A	B	B	A	A	H	B	B	A	B	A	B	A	B	A	H	A	A
chr5_47871857	chr5	47871857	A	B	A	B	B	B	B	A	*	A	A	*	B	A	B	A	B	A	B	B	A	B	A	A	B	A	A	A	B	A	B	B	A	A	H	B	B	A	*	A	B	A	B	A	A	A	A
chr5_47914119	chr5	47914119	A	B	A	B	B	B	B	A	A	A	A	*	B	A	B	A	B	A	B	B	A	B	A	A	B	A	A	A	B	A	B	B	A	A	H	B	B	A	*	A	B	A	B	A	A	A	A
chr5_47950780	chr5	47950780	A	B	A	B	B	B	B	A	*	A	A	B	B	H	B	A	B	A	B	B	A	B	A	A	B	A	A	A	B	A	B	B	A	A	H	B	B	A	A	A	B	A	B	A	A	A	A
chr5_48641380	chr5	48641380	A	B	A	B	B	B	B	A	B	A	A	B	B	A	B	A	B	A	B	B	A	B	A	A	B	A	A	A	B	A	B	B	A	A	H	B	B	A	A	A	B	A	B	A	H	A	A
chr5_49337254	chr5	49337254	A	B	A	B	B	B	B	A	B	A	A	B	B	A	B	H	B	A	B	B	A	B	A	A	B	A	A	A	B	A	B	B	A	A	H	B	B	A	A	A	B	A	B	A	H	A	A
chr5_49650816	chr5	49650816	A	B	A	B	B	B	B	A	B	A	A	B	B	H	H	H	B	A	B	B	A	B	A	A	B	A	A	A	B	A	B	B	A	A	A	B	B	A	A	A	B	A	B	A	H	A	A
chr5_49818913	chr5	49818913	A	B	A	B	B	B	B	A	B	A	A	A	B	A	B	H	B	A	B	B	A	B	A	A	B	A	A	A	B	A	B	B	A	A	A	B	B	A	A	A	B	A	B	A	H	A	A
chr5_49932302	chr5	49932302	A	B	A	B	B	B	B	A	B	A	A	B	B	A	B	H	B	A	B	B	A	B	A	A	B	A	A	A	B	A	B	B	A	A	A	B	B	A	*	A	B	A	B	A	H	A	A
chr5_49955846	chr5	49955846	A	B	A	B	B	B	B	A	B	A	A	A	B	A	B	A	A	A	B	B	A	B	A	A	B	A	A	A	B	A	B	B	A	A	A	B	B	A	B	A	B	A	B	A	H	A	A
chr5_50341527	chr5	50341527	A	B	A	B	B	B	B	A	B	A	A	A	B	A	B	H	A	A	B	B	A	B	A	A	B	B	A	A	B	A	B	B	A	A	A	B	B	A	B	A	B	A	B	A	H	A	A
chr5_50966437	chr5	50966437	A	B	A	B	B	B	B	A	B	A	A	A	B	A	B	H	A	A	B	B	A	B	A	A	B	B	A	B	B	A	B	B	A	A	A	B	B	A	B	*	B	A	B	A	H	A	A
chr5_51192353	chr5	51192353	A	H	A	B	B	B	B	A	B	A	A	A	B	A	B	H	A	A	B	B	A	B	A	A	B	B	A	B	B	A	B	B	A	A	A	A	B	A	B	A	B	A	B	A	H	A	A
chr5_52230997	chr5	52230997	A	B	A	B	B	B	B	A	*	A	A	A	B	A	B	H	A	A	B	B	A	B	A	A	B	B	A	H	B	A	B	B	A	A	A	B	A	A	B	A	B	A	B	A	A	A	A
chr5_52585993	chr5	52585993	A	H	A	B	B	B	B	A	B	A	A	A	B	H	B	A	A	A	B	B	A	B	A	A	B	B	A	B	B	A	B	B	A	A	B	B	A	A	B	A	B	A	B	A	H	A	A
chr5_52950526	chr5	52950526	A	B	A	B	B	B	B	A	B	A	A	A	B	H	B	A	A	A	B	B	A	B	A	A	B	B	A	B	B	A	B	A	A	A	B	B	A	A	B	A	B	A	A	A	B	A	A
chr5_53246499	chr5	53246499	A	B	A	B	B	B	B	A	*	A	A	A	B	A	B	H	A	A	B	B	A	B	A	A	B	B	A	B	B	A	B	A	A	A	B	B	A	A	B	A	B	A	A	A	B	A	A
chr5_53828104	chr5	53828104	A	B	A	B	B	B	B	A	A	A	A	A	B	A	B	H	A	A	B	B	A	B	A	B	B	B	A	B	B	A	B	A	A	A	B	B	A	A	B	A	B	A	A	A	H	A	A
chr5_53890582	chr5	53890582	A	B	A	B	B	B	B	A	*	B	A	A	B	A	B	H	A	A	B	B	A	B	A	B	B	B	A	B	B	A	B	A	A	A	B	B	A	A	B	A	B	A	A	A	B	A	A
chr5_54749978	chr5	54749978	A	B	A	B	B	B	B	A	A	B	A	A	B	B	B	H	A	A	B	B	B	B	B	B	B	B	A	B	B	B	B	A	A	A	B	B	A	A	A	A	B	A	A	B	H	A	A
chr5_55169015	chr5	55169015	A	B	A	B	B	B	B	A	A	B	A	A	B	B	B	A	A	A	B	B	B	B	B	B	B	B	A	A	B	B	A	A	A	A	B	B	A	A	A	A	B	A	A	B	H	A	A
chr5_55290287	chr5	55290287	A	B	A	A	B	A	B	A	*	B	A	A	B	B	B	H	A	A	A	B	B	B	B	B	B	B	A	B	B	B	A	A	A	A	B	B	A	A	A	A	B	B	A	B	B	A	A
chr5_55303029	chr5	55303029	A	B	A	H	B	A	B	B	*	B	A	A	B	B	B	A	B	A	A	B	B	B	B	B	B	B	A	B	B	B	A	A	A	A	B	B	A	A	A	A	B	B	A	B	B	A	A
chr5_55404391	chr5	55404391	A	B	A	H	B	A	B	B	A	B	A	A	B	B	B	H	B	A	A	B	B	B	B	B	B	B	A	B	B	B	A	A	A	A	B	B	A	A	A	A	B	B	A	B	H	A	A
chr5_55539776	chr5	55539776	A	B	A	A	B	A	B	B	A	*	A	A	B	B	B	H	B	*	A	B	B	B	B	B	B	*	A	B	B	B	A	A	A	*	B	B	A	A	A	A	B	B	A	H	H	A	A
chr5_58202977	chr5	58202977	A	B	A	A	B	A	B	B	A	B	A	B	B	B	B	A	B	A	A	B	B	B	B	B	B	B	A	B	B	A	A	A	A	A	B	B	A	A	A	A	H	B	A	B	H	A	A
chr5_58228657	chr5	58228657	A	B	A	H	B	A	B	B	A	B	A	*	B	B	B	H	B	A	A	B	B	B	B	B	B	*	A	B	B	A	A	A	A	A	B	B	A	A	A	A	H	B	A	B	A	A	A
chr5_59162522	chr5	59162522	B	B	A	H	B	B	B	A	A	B	A	*	B	B	B	H	B	A	A	B	B	B	A	B	B	B	A	B	A	A	A	A	H	A	A	B	A	A	A	A	H	B	A	A	A	A	B
chr5_59181437	chr5	59181437	B	B	A	A	B	B	B	A	A	B	A	A	B	B	B	A	B	A	A	B	B	B	A	B	B	H	A	B	A	A	A	A	H	A	A	B	A	A	A	A	H	B	A	A	A	A	B
chr5_59302591	chr5	59302591	B	B	A	A	B	B	B	A	A	B	A	A	B	B	B	H	B	A	A	B	B	B	A	B	B	B	A	B	A	A	A	A	H	B	A	B	A	A	A	A	H	B	A	A	A	A	B
chr5_59599817	chr5	59599817	A	B	A	H	B	B	B	A	A	B	A	*	B	B	B	H	B	A	A	B	B	B	A	B	B	H	A	B	A	A	A	A	B	B	A	B	A	A	A	A	H	B	A	A	A	A	B
chr5_60221843	chr5	60221843	A	B	A	A	B	B	B	A	A	B	A	*	B	B	B	H	B	A	A	B	B	B	A	B	B	H	A	B	A	A	A	A	B	B	A	B	A	A	A	A	B	B	A	A	*	A	B
chr5_60423690	chr5	60423690	A	B	A	A	B	B	B	A	A	B	A	B	B	B	B	A	B	A	A	B	B	B	A	B	B	B	A	B	A	A	A	A	B	B	A	B	A	A	A	A	B	B	A	A	B	A	B
chr5_60771749	chr5	60771749	A	B	A	A	B	B	B	A	A	B	A	B	B	B	B	A	B	A	A	B	B	B	A	B	B	B	A	B	A	A	A	A	B	B	A	B	A	A	A	A	B	B	A	A	B	A	B
chr5_60782880	chr5	60782880	A	B	A	A	B	B	B	A	A	B	A	A	B	B	B	H	B	A	A	B	B	B	A	B	B	B	A	B	A	A	A	A	B	B	A	B	A	A	A	A	B	B	A	A	A	A	B
chr5_60839778	chr5	60839778	A	B	A	A	B	B	B	A	A	B	A	*	B	B	B	H	B	A	A	A	B	B	A	B	B	B	A	B	A	A	A	A	B	B	A	B	A	A	A	A	B	B	A	A	A	A	B
chr5_61270262	chr5	61270262	A	B	A	A	B	B	B	A	A	B	A	B	B	B	B	H	B	A	A	A	B	B	A	B	B	B	A	B	A	A	A	A	B	B	A	B	A	A	A	A	B	B	A	A	B	A	B
chr5_61534363	chr5	61534363	A	B	A	A	B	B	B	A	A	B	A	*	B	B	B	H	B	A	A	A	B	B	A	B	B	B	A	B	A	A	A	A	B	B	A	B	A	A	A	A	B	B	A	A	*	A	B
chr5_62081111	chr5	62081111	A	B	A	A	B	B	B	A	A	B	A	B	B	B	B	H	B	A	A	A	B	B	A	B	B	B	A	B	A	A	A	A	B	B	A	B	A	B	A	A	B	B	A	A	B	A	B
chr5_62145083	chr5	62145083	A	B	A	H	B	B	B	A	A	B	A	A	B	B	B	H	B	A	A	A	B	*	A	B	B	*	A	B	A	A	A	A	*	B	A	B	A	B	A	A	B	*	B	A	A	A	B
chr5_62176296	chr5	62176296	A	B	A	H	B	B	B	A	A	B	A	A	B	B	B	H	B	A	A	A	B	A	A	B	B	A	A	B	A	A	A	A	A	B	A	B	A	B	A	A	B	A	B	A	A	A	B
chr5_62212446	chr5	62212446	A	B	A	A	B	B	B	A	A	B	A	A	B	B	B	H	B	A	A	A	B	A	A	B	B	A	A	B	A	A	A	A	A	B	A	B	A	B	A	A	B	A	B	A	A	A	B
chr6_3395349	chr6	3395349	B	B	A	A	A	B	A	B	A	A	A	A	A	A	B	A	A	B	B	B	B	B	B	A	A	B	A	B	B	A	B	A	B	B	B	B	A	H	A	B	B	A	A	A	A	B	A
chr6_32119748	chr6	32119748	B	B	A	A	A	B	A	A	*	A	A	*	A	B	A	A	A	B	B	B	B	B	A	B	A	B	B	B	H	A	B	A	B	A	B	B	B	A	*	B	B	B	B	A	*	B	B
chr6_32109118	chr6	32109118	B	B	A	A	A	B	A	A	*	A	A	*	A	H	A	A	A	B	B	B	B	B	A	B	A	B	B	B	H	A	B	A	B	A	B	B	B	A	*	B	B	B	B	A	*	B	B
chr6_31781298	chr6	31781298	B	B	A	A	A	B	A	A	*	A	A	*	A	B	A	A	A	B	B	B	B	B	A	B	A	B	B	B	H	A	B	A	B	A	B	B	B	A	*	B	B	B	B	A	*	B	B
chr6_37914659	chr6	37914659	B	B	A	A	A	B	A	A	B	A	A	B	A	B	A	A	A	B	B	B	B	B	A	B	A	B	B	B	H	A	B	A	B	A	B	B	B	A	*	B	B	B	B	A	B	B	B
chr6_39971021	chr6	39971021	B	*	A	A	A	B	A	A	B	A	A	B	A	B	A	A	A	B	B	B	B	B	A	B	A	B	B	B	A	A	A	A	B	A	B	B	B	A	B	B	B	B	B	A	B	B	B
chr6_40201735	chr6	40201735	B	B	A	A	A	B	A	A	B	B	A	B	A	B	A	A	A	B	B	B	B	B	A	B	A	B	B	B	A	A	A	A	B	A	B	B	B	A	A	B	B	B	B	A	B	B	B
chr6_40279984	chr6	40279984	B	B	A	A	A	B	H	A	B	B	A	B	A	H	A	A	A	B	B	B	B	B	A	B	A	B	B	B	A	A	A	A	B	A	B	B	B	A	*	B	B	B	B	A	B	B	B
chr6_40747846	chr6	40747846	B	B	B	A	A	B	A	A	B	B	A	B	A	B	A	A	A	B	B	B	B	B	A	B	A	B	B	B	A	A	A	A	B	A	B	B	B	A	B	B	B	B	B	A	B	B	B
chr6_41241999	chr6	41241999	B	B	B	A	A	*	A	A	B	B	A	B	A	B	B	A	A	B	B	B	B	B	A	B	A	B	B	B	A	A	A	*	B	A	B	B	B	A	*	B	B	H	B	A	B	B	B
chr6_40955214	chr6	40955214	B	B	B	A	A	B	A	A	B	B	A	B	A	B	B	A	A	B	B	B	B	B	A	B	A	B	B	B	A	A	A	A	B	A	B	B	B	A	B	B	B	B	B	A	B	B	B
chr6_41383867	chr6	41383867	B	B	B	A	A	B	A	A	B	B	A	B	A	B	B	A	A	B	B	B	B	B	A	B	A	B	B	B	A	A	A	A	B	A	B	B	B	A	A	B	B	B	B	A	B	B	B
chr6_42221455	chr6	42221455	B	B	B	A	A	B	A	A	A	B	A	A	A	B	B	A	A	B	B	B	B	B	A	B	A	B	B	B	A	A	A	A	B	A	B	B	B	A	A	B	B	B	B	A	A	B	B
chr6_42356168	chr6	42356168	B	B	B	A	A	B	A	A	A	A	A	A	A	B	B	A	A	B	B	B	B	B	A	B	A	B	B	B	A	A	A	A	B	A	B	B	B	A	A	B	B	B	B	A	A	B	B
chr6_42407785	chr6	42407785	B	B	B	A	A	B	A	A	A	B	A	A	A	B	B	A	A	B	B	B	B	B	A	B	A	B	B	B	A	A	A	A	B	A	B	B	B	A	A	B	B	B	B	A	A	B	B
chr6_42491845	chr6	42491845	B	B	B	A	A	B	A	A	B	B	A	A	A	B	B	A	A	B	B	B	B	B	A	B	A	B	B	B	A	A	A	A	B	A	B	B	B	A	*	B	B	B	B	A	B	B	B
chr6_42442154	chr6	42442154	B	B	B	A	A	B	A	A	*	B	A	A	A	B	B	A	A	B	B	B	B	B	A	B	A	B	B	B	A	A	A	A	B	A	B	B	B	A	*	B	B	B	B	A	*	B	B
chr6_42648444	chr6	42648444	B	B	B	A	A	B	B	A	*	B	A	*	A	B	B	*	A	B	B	B	B	B	A	B	A	B	B	B	*	A	A	A	B	A	B	B	B	A	*	B	B	B	B	A	*	B	B
chr6_42619396	chr6	42619396	B	B	B	A	A	B	B	A	B	B	A	A	A	B	B	A	A	B	B	B	B	B	A	B	A	B	B	B	A	A	A	A	B	A	B	B	B	A	A	B	B	B	B	A	B	B	B
chr6_42789974	chr6	42789974	B	H	B	A	A	B	B	A	A	B	A	A	A	B	B	A	A	B	B	B	B	B	A	B	A	B	B	B	A	A	A	A	B	A	B	B	B	A	B	B	B	B	B	A	A	B	B
chr6_43207111	chr6	43207111	B	B	B	A	A	B	B	A	A	B	A	A	A	B	B	A	A	B	B	B	B	B	A	B	A	B	B	B	A	A	A	A	B	H	B	B	B	A	B	B	B	B	B	A	A	B	B
chr6_46088217	chr6	46088217	B	B	B	A	A	A	B	B	*	B	A	B	A	A	B	A	B	B	B	B	B	B	A	B	B	B	B	B	A	A	A	A	*	A	B	B	A	A	B	B	B	B	B	A	A	B	A
chr6_46676254	chr6	46676254	B	B	B	A	A	*	B	B	A	B	A	B	A	A	B	A	B	B	B	B	A	B	A	B	B	B	A	B	A	A	A	A	A	A	B	B	A	A	A	B	B	B	B	A	A	B	A
chr6_46620829	chr6	46620829	B	B	B	A	A	A	B	B	B	B	A	B	A	A	B	A	B	B	B	B	A	B	A	B	B	B	A	B	A	A	A	A	B	A	B	B	A	A	B	B	B	B	B	A	A	B	A
chr6_47020135	chr6	47020135	B	B	A	A	A	A	B	B	B	B	A	A	A	A	B	A	B	B	B	B	A	B	A	B	B	B	B	B	A	A	A	A	B	A	B	B	A	A	B	B	B	H	B	A	A	B	A
chr6_47299571	chr6	47299571	B	B	A	A	A	A	B	B	A	B	A	A	A	A	B	A	B	B	B	B	A	B	A	B	B	B	B	B	A	A	A	A	A	A	B	B	A	A	A	B	B	H	B	A	A	B	A
chr6_47419626	chr6	47419626	B	B	A	A	A	A	B	B	A	B	A	A	A	H	B	A	B	B	B	B	A	B	A	B	B	B	B	B	A	A	A	A	A	A	B	B	A	A	A	B	B	H	B	A	A	B	A
chr6_47518296	chr6	47518296	B	B	A	A	A	A	B	B	*	B	A	A	A	H	B	A	B	A	B	B	A	B	A	B	B	B	B	B	A	A	A	A	*	A	B	B	A	A	*	*	B	H	B	A	A	B	A
chr6_47551734	chr6	47551734	B	B	A	A	A	A	B	B	A	B	A	A	A	H	B	A	B	A	B	B	A	B	A	B	B	B	B	B	A	A	A	A	A	A	B	B	A	A	B	A	B	H	B	A	A	B	A
chr6_47572548	chr6	47572548	B	B	A	A	A	A	B	B	*	B	A	A	A	A	B	A	B	A	B	B	A	B	A	B	B	B	B	B	A	A	A	A	*	A	B	B	A	A	B	A	B	H	B	A	A	B	A
chr6_47681915	chr6	47681915	B	B	A	A	A	A	B	B	B	B	A	A	A	H	B	A	B	A	B	B	A	B	A	B	B	B	B	B	A	A	A	A	B	A	B	B	A	A	B	B	B	H	B	A	A	B	A
chr6_47722739	chr6	47722739	B	B	A	A	A	A	B	B	B	B	A	A	A	A	B	H	B	A	B	B	A	B	A	B	B	B	B	B	A	A	A	A	B	A	B	B	A	A	B	B	B	H	B	A	A	B	A
chr6_48621036	chr6	48621036	A	B	A	A	A	A	B	B	B	B	A	A	A	H	B	B	B	A	B	B	A	B	A	B	B	B	B	A	A	A	A	A	B	A	B	B	A	A	B	A	B	A	B	A	A	B	A
chr6_48511577	chr6	48511577	A	B	A	A	A	*	B	B	B	B	A	A	A	A	B	B	B	A	B	B	A	B	A	B	B	B	B	A	A	A	A	A	B	A	B	B	A	A	B	B	B	A	B	A	A	B	A
chr6_48823352	chr6	48823352	A	B	A	A	A	A	B	B	A	B	A	A	A	H	B	H	B	A	B	B	A	B	A	B	B	B	B	A	A	A	A	A	B	A	B	B	A	A	B	B	B	A	B	A	A	B	A
chr6_48861138	chr6	48861138	A	B	A	A	A	A	B	B	A	B	A	A	A	A	B	H	B	A	B	B	A	B	A	B	B	B	B	A	A	A	A	A	*	A	B	B	A	A	*	B	B	A	B	A	A	B	A
chr6_49279258	chr6	49279258	A	B	A	A	A	B	B	B	A	B	A	A	A	A	B	H	B	A	B	B	A	B	A	B	B	B	B	A	A	A	A	A	A	A	B	B	*	A	A	B	B	A	B	B	A	B	A
chr6_49625072	chr6	49625072	A	B	A	A	A	B	B	B	A	B	A	A	A	A	B	H	B	A	B	B	A	B	A	B	B	B	B	A	A	A	A	A	A	A	B	B	A	A	A	B	B	A	B	B	A	B	A
chr6_49707433	chr6	49707433	A	B	A	A	A	B	B	B	A	B	A	A	A	A	B	B	B	A	B	A	A	B	A	B	B	B	B	A	A	A	A	A	A	A	B	B	A	A	A	B	B	A	B	B	A	B	A
chr6_50355770	chr6	50355770	A	B	A	A	A	A	B	B	A	B	A	A	A	A	B	H	B	A	B	A	A	B	A	B	B	B	B	A	A	A	A	A	A	A	B	B	A	A	A	B	B	A	B	B	A	B	A
chr6_50954272	chr6	50954272	B	B	A	A	A	*	B	B	A	B	A	A	*	*	B	H	B	A	B	A	A	B	A	B	B	B	B	A	A	A	A	A	A	A	B	B	A	A	A	B	B	A	B	B	A	H	A
chr6_50885653	chr6	50885653	B	B	A	A	A	A	B	B	A	B	A	A	A	A	B	H	B	A	B	A	A	B	A	B	B	B	B	A	A	A	A	A	A	A	B	B	A	A	A	B	B	A	B	B	A	H	A
chr6_51592657	chr6	51592657	B	B	A	A	A	A	B	B	A	B	A	A	A	A	B	*	B	A	B	A	A	B	A	A	B	B	B	A	A	A	A	A	A	A	B	B	A	A	A	B	A	A	B	B	A	H	A
chr6_51574305	chr6	51574305	B	B	A	A	A	A	B	B	A	B	A	A	A	A	B	H	B	A	B	A	A	B	A	A	B	B	B	A	A	A	A	A	A	A	B	B	A	A	A	B	A	A	B	B	A	H	A
chr6_51283027	chr6	51283027	B	B	A	A	A	*	B	B	A	B	A	A	A	H	B	B	B	A	B	A	A	B	A	*	B	B	B	A	A	A	*	A	*	A	B	B	A	A	A	B	A	*	B	B	*	H	A
chr6_51316051	chr6	51316051	B	B	A	A	A	A	B	B	A	B	A	A	A	H	B	H	B	A	B	A	A	B	A	A	B	B	B	A	A	A	A	A	B	A	B	B	A	A	A	B	A	A	B	B	A	H	A
chr6_51798581	chr6	51798581	B	B	A	A	A	A	B	B	A	B	A	A	A	A	B	H	B	A	B	A	A	B	A	A	B	B	B	A	A	A	A	A	A	A	B	B	A	A	A	B	A	A	B	B	A	A	A
chr6_51965168	chr6	51965168	B	B	A	A	A	A	B	B	A	B	A	A	A	A	B	B	B	A	B	B	A	B	A	A	B	B	B	A	A	A	A	A	A	A	B	B	A	A	A	B	A	A	B	B	A	A	A
chr6_52100926	chr6	52100926	B	B	A	A	A	A	B	B	A	B	A	A	A	A	B	H	B	A	B	B	A	B	A	A	B	B	B	A	A	A	A	A	A	A	B	B	A	A	A	*	A	A	B	B	A	A	A
chr6_52113585	chr6	52113585	B	B	A	A	A	A	B	B	A	B	A	A	A	A	B	H	B	A	B	B	A	B	A	A	B	B	B	A	A	A	A	A	A	A	B	B	A	A	A	B	A	A	B	B	A	A	A
chr6_52286634	chr6	52286634	B	B	A	A	A	A	B	B	A	B	A	A	A	A	B	H	B	A	B	B	A	B	A	A	B	B	B	A	A	A	A	A	B	A	B	B	A	A	*	B	A	A	B	B	A	A	A
chr6_52246902	chr6	52246902	B	B	A	A	A	A	B	B	A	B	A	A	A	H	B	H	B	A	B	B	A	B	A	A	B	B	B	A	A	A	A	A	B	A	B	B	A	A	A	B	A	A	B	B	A	A	A
chr6_52362623	chr6	52362623	B	B	A	A	A	A	B	B	A	B	A	A	A	A	B	*	B	A	B	B	A	B	A	A	B	B	B	*	A	A	A	A	B	A	B	B	A	A	B	B	A	A	B	B	A	A	A
chr6_52462543	chr6	52462543	B	B	A	A	A	A	B	B	A	B	A	A	A	H	B	H	B	A	B	B	A	B	A	A	B	B	B	A	A	A	A	A	B	A	B	A	A	A	B	B	A	A	B	B	A	A	A
chr6_52603782	chr6	52603782	B	B	A	A	A	A	B	B	A	B	A	A	A	A	B	H	B	A	B	B	A	B	A	A	B	B	B	A	A	A	A	A	B	A	B	A	A	A	B	B	A	A	B	B	A	A	A
chr6_52796109	chr6	52796109	B	B	A	A	A	A	B	B	A	B	A	A	A	A	B	H	B	A	B	B	A	B	A	A	B	B	B	A	A	A	A	A	B	A	B	A	A	A	B	B	A	A	B	B	A	A	A
chr6_52854305	chr6	52854305	B	B	A	A	A	A	B	B	A	B	A	A	A	A	B	H	B	A	B	B	A	B	A	A	B	B	B	A	A	A	A	A	B	A	B	A	A	A	B	B	A	A	B	B	A	A	A
chr6_52959830	chr6	52959830	B	B	A	A	A	A	B	B	A	B	A	A	A	A	B	H	B	A	B	B	A	B	A	A	B	B	B	B	A	A	A	A	B	A	B	A	A	A	A	B	A	A	B	B	A	A	A
chr6_52871124	chr6	52871124	B	B	A	A	A	A	B	B	A	B	A	A	A	A	B	H	B	A	B	B	A	B	A	A	B	B	B	B	A	A	A	A	B	A	B	A	A	A	B	B	A	A	B	B	A	A	A
chr6_53448864	chr6	53448864	B	B	A	A	A	A	B	B	A	B	A	A	A	A	B	B	B	A	B	B	A	B	A	A	B	B	B	B	A	A	A	A	B	A	B	A	A	A	B	B	A	A	B	B	A	A	A
chr6_53160790	chr6	53160790	B	B	A	A	A	A	B	B	A	B	A	A	A	A	B	H	B	A	B	B	A	B	A	A	B	B	B	B	A	A	A	A	B	A	B	A	A	A	B	B	A	A	B	B	A	A	A
chr6_53543301	chr6	53543301	B	B	A	A	A	A	B	B	A	B	A	A	A	A	B	H	B	A	B	B	A	B	A	A	B	B	B	B	A	A	A	A	B	A	B	A	A	A	A	A	A	A	B	B	A	A	A
chr6_54864244	chr6	54864244	B	B	A	A	A	B	B	A	A	B	B	A	A	A	B	H	B	A	B	B	B	B	A	A	B	B	A	A	A	A	A	A	B	A	B	A	A	A	B	B	A	A	B	B	A	A	A
chr6_55175139	chr6	55175139	B	A	A	A	A	B	B	A	A	B	B	A	A	A	B	H	B	A	B	B	B	B	A	A	B	B	A	A	A	B	A	A	B	A	B	A	A	A	A	B	A	A	B	B	A	A	A
chr6_55572975	chr6	55572975	B	A	A	A	A	B	B	A	A	B	B	A	A	H	B	H	B	A	B	B	B	B	A	A	B	B	A	A	A	B	A	A	B	A	B	A	A	A	A	B	A	A	B	B	A	A	A
chr6_55675634	chr6	55675634	B	A	A	A	A	B	B	A	A	B	B	A	A	A	B	H	B	A	B	B	B	B	A	A	B	B	A	A	A	B	A	A	B	A	B	A	A	A	B	B	A	A	B	B	A	A	A
chr6_55911057	chr6	55911057	B	A	A	A	A	B	B	A	A	B	B	A	A	A	A	B	B	A	B	B	B	B	A	A	B	B	A	A	A	B	A	A	B	A	B	A	A	A	B	B	A	A	B	B	A	A	A
chr6_55954406	chr6	55954406	B	A	A	A	A	B	B	A	A	B	B	A	A	A	A	B	B	A	B	B	B	B	A	A	B	B	A	A	A	B	A	A	B	A	B	A	A	A	B	B	A	A	B	B	A	A	A
chr6_56432910	chr6	56432910	B	A	B	A	A	B	B	A	A	B	B	A	A	A	A	H	B	A	B	A	B	B	A	A	B	B	A	A	A	B	A	A	B	A	B	A	A	A	B	B	A	B	B	B	A	A	A
chr6_56590762	chr6	56590762	B	A	B	A	A	B	B	A	A	B	B	A	A	A	A	B	B	A	B	A	B	B	A	A	B	B	A	A	A	H	A	A	B	A	B	A	A	A	B	B	A	B	B	A	A	A	A
chr6_56622781	chr6	56622781	B	A	B	A	A	B	B	A	A	B	B	A	A	A	A	B	B	A	B	A	B	B	A	A	B	B	A	A	A	B	A	A	B	A	B	A	A	A	A	B	A	B	B	A	A	A	B
chr6_56610927	chr6	56610927	B	A	B	A	A	B	B	A	A	B	B	A	A	A	A	H	B	A	B	A	B	B	A	A	B	B	A	A	A	B	A	A	B	A	B	A	A	A	*	B	A	B	B	A	A	A	B
chr7_7725463	chr7	7725463	A	A	B	B	B	B	B	A	A	B	A	A	B	A	A	H	A	B	B	B	A	B	A	A	A	A	B	A	B	B	B	A	*	A	B	B	B	B	A	A	B	B	A	A	*	B	B
chr7_8198924	chr7	8198924	A	A	B	B	B	B	A	A	A	B	H	B	B	A	A	H	A	B	B	B	A	B	A	A	A	B	B	A	B	H	B	A	B	A	B	B	B	B	A	B	B	B	A	H	B	B	B
chr7_8844916	chr7	8844916	A	A	B	H	B	B	A	A	A	B	H	B	B	A	A	H	A	B	B	B	A	B	A	A	A	B	A	A	B	A	B	A	B	A	B	B	B	B	A	*	B	B	A	A	B	B	B
chr7_8862199	chr7	8862199	A	A	B	A	B	B	A	A	A	B	H	B	B	A	A	A	A	B	B	B	A	B	A	A	A	B	A	A	B	A	B	A	B	A	B	B	B	B	B	B	B	B	A	A	B	B	B
chr7_9652626	chr7	9652626	A	A	B	A	B	B	A	A	A	B	H	A	B	A	A	H	A	A	B	B	B	A	B	A	A	B	A	A	B	A	B	B	A	A	B	B	B	B	B	B	B	B	A	A	A	B	B
chr7_14220809	chr7	14220809	A	A	B	A	B	B	A	A	A	B	H	A	B	A	A	A	A	A	B	B	B	A	B	A	A	B	A	A	B	A	B	H	A	A	B	B	B	B	B	B	B	B	A	A	A	B	B
chr7_53651801	chr7	53651801	A	A	B	A	H	B	A	A	A	B	A	B	B	A	A	H	B	A	B	B	B	A	B	B	A	B	A	A	B	A	B	A	B	A	B	A	B	B	B	B	A	A	A	A	B	B	B
chr7_53991180	chr7	53991180	A	A	B	A	B	B	A	A	A	B	A	B	B	A	A	H	B	A	B	B	B	A	B	B	A	B	A	A	B	A	B	A	B	A	B	A	B	B	B	B	A	A	A	A	B	B	B
chr7_54198150	chr7	54198150	A	A	B	B	B	B	A	A	A	B	A	*	B	A	A	H	B	A	B	B	B	A	B	B	A	B	A	A	B	A	B	A	*	A	B	A	B	B	*	B	A	A	A	A	*	B	B
chr7_54838381	chr7	54838381	A	A	B	B	B	B	A	A	A	A	A	B	B	A	A	H	B	A	B	B	B	A	B	B	A	B	A	A	B	H	B	*	B	A	B	A	B	B	B	B	A	A	A	A	B	B	B
chr7_54997500	chr7	54997500	A	A	B	B	B	B	A	A	A	*	B	A	B	A	A	A	B	A	B	B	B	A	B	B	A	B	A	A	B	A	B	H	B	A	B	A	B	B	*	B	A	A	A	A	B	B	B
chr7_55224673	chr7	55224673	A	A	A	B	B	B	A	A	A	A	B	B	B	A	A	H	B	A	B	B	B	A	B	B	A	A	A	A	B	A	B	A	B	A	B	A	B	B	A	B	A	A	A	A	B	B	B
chr7_55277854	chr7	55277854	A	A	*	B	B	B	A	A	A	H	B	B	B	A	A	H	B	A	B	B	B	A	B	B	A	A	A	A	B	A	B	A	A	A	B	A	B	B	A	B	A	A	A	A	A	B	B
chr7_55445314	chr7	55445314	A	A	A	B	B	B	B	A	A	A	B	B	B	A	A	A	B	A	B	B	B	A	B	B	A	A	A	A	B	A	B	A	A	A	B	A	B	B	A	B	A	A	A	A	A	B	B
chr7_56937204	chr7	56937204	A	A	A	B	B	B	H	A	A	A	B	A	B	A	A	A	A	A	B	B	B	A	B	B	A	A	B	A	B	H	B	B	A	A	B	A	B	B	A	B	B	A	A	A	A	B	B
chr7_57108077	chr7	57108077	A	A	A	B	B	B	H	A	A	A	B	*	B	A	A	H	A	A	B	B	B	A	B	B	A	A	B	A	B	H	B	B	A	A	B	A	B	B	A	B	B	A	A	A	A	B	B
chr7_57127960	chr7	57127960	A	A	A	B	B	B	H	A	B	A	B	B	B	A	A	H	A	A	B	B	B	*	B	B	A	A	B	A	B	A	B	B	B	A	B	A	B	B	A	A	B	A	A	A	B	B	B
chr7_57253153	chr7	57253153	A	A	A	B	B	B	H	A	B	A	B	B	B	A	A	A	A	A	B	B	B	A	B	B	A	A	B	A	B	A	B	B	B	A	B	A	B	B	A	A	B	A	A	A	B	B	B
chr7_57366992	chr7	57366992	A	A	A	B	B	B	B	A	*	A	B	*	B	A	A	B	A	A	B	B	B	A	B	B	A	A	B	A	B	A	B	B	B	A	B	A	B	B	A	B	B	A	A	A	*	B	B
chr7_57703318	chr7	57703318	A	A	A	B	B	B	B	A	A	A	A	A	B	A	A	B	A	A	B	B	B	A	B	A	A	A	B	B	B	A	*	B	B	A	B	A	B	B	A	B	B	A	A	A	A	B	B
chr7_57832844	chr7	57832844	A	A	B	B	B	B	H	A	B	A	A	B	B	H	A	B	A	A	B	A	B	A	B	B	A	A	B	B	B	A	B	B	B	A	B	A	B	B	A	B	B	A	A	A	B	B	B
chr7_58070143	chr7	58070143	A	A	B	B	B	B	H	A	A	A	A	A	B	H	A	B	B	A	B	A	B	A	B	B	A	A	B	H	B	A	B	B	B	A	B	B	B	B	A	A	B	A	A	A	A	H	B
chr7_58170792	chr7	58170792	A	A	B	B	B	B	H	A	A	A	A	A	B	H	A	B	B	A	B	A	B	A	B	B	A	A	B	H	B	A	B	B	B	A	B	B	B	B	A	A	B	A	A	A	A	H	B
chr7_58280563	chr7	58280563	B	A	B	B	B	B	B	A	A	A	A	A	B	H	A	B	B	A	B	A	B	A	B	B	A	A	B	B	B	H	B	B	B	A	B	B	B	B	A	A	B	A	A	A	A	H	B
chr7_58293093	chr7	58293093	B	H	B	B	B	B	B	A	A	A	A	A	B	H	A	B	B	A	B	A	B	A	B	B	A	A	B	B	B	A	B	*	B	A	B	B	B	B	A	A	B	A	A	A	A	H	B
chr7_58310968	chr7	58310968	B	B	B	A	B	B	B	A	A	A	A	A	B	B	A	B	B	A	B	A	B	A	B	B	A	A	B	H	B	A	B	B	B	A	B	B	B	B	A	A	B	A	A	A	H	H	B
chr7_58395121	chr7	58395121	B	B	B	A	B	B	B	A	A	A	A	A	B	B	A	B	B	A	B	A	B	A	B	B	A	A	B	H	B	A	B	B	B	A	B	B	B	B	A	A	B	A	B	A	A	H	B
chr7_58741341	chr7	58741341	B	B	B	H	B	B	A	A	B	A	A	B	B	A	A	B	B	A	B	A	B	A	B	B	A	B	B	A	B	A	B	B	B	A	B	B	B	B	A	A	B	A	B	A	B	H	B
chr7_58820646	chr7	58820646	B	B	B	H	B	B	A	A	A	A	A	A	B	A	A	B	B	A	B	A	B	A	B	B	A	A	B	A	B	H	B	B	B	A	B	B	B	B	A	A	B	A	B	A	A	H	B
chr7_59027028	chr7	59027028	B	B	B	A	B	B	A	B	A	A	A	A	B	A	A	B	B	A	B	A	B	A	B	B	A	B	B	A	B	A	B	B	B	A	A	B	B	B	A	A	B	A	B	A	A	A	B
chr7_59098866	chr7	59098866	B	B	B	A	B	B	A	B	A	A	A	A	B	A	A	B	B	A	B	A	B	A	B	H	A	*	B	A	B	A	B	B	B	A	A	B	B	B	A	A	B	A	B	A	A	A	B
chr7_59242352	chr7	59242352	B	B	B	A	B	B	A	B	A	A	A	B	B	A	A	B	B	A	B	A	B	A	B	B	A	A	B	A	B	A	B	B	B	A	A	B	B	B	A	A	B	A	B	A	A	A	B
chr7_59727397	chr7	59727397	B	B	B	A	B	B	A	B	A	A	A	A	B	A	A	B	B	A	B	A	B	A	B	H	A	A	B	A	B	A	B	B	B	A	A	B	B	B	A	A	B	A	B	A	A	A	B
chr7_59865360	chr7	59865360	B	B	B	A	B	B	A	B	A	A	A	B	B	A	A	B	B	A	B	A	B	A	B	*	A	A	B	A	B	*	B	B	B	A	A	B	B	B	A	A	B	A	B	A	A	A	B
chr7_59916544	chr7	59916544	B	B	B	H	B	B	A	B	B	A	A	B	B	A	A	B	B	A	B	A	B	A	B	A	A	B	B	A	B	A	B	B	B	B	A	B	B	B	A	A	B	A	B	A	B	A	B
chr7_60006969	chr7	60006969	B	B	B	A	B	B	A	B	B	A	A	B	B	A	A	B	B	A	B	A	B	A	B	A	A	B	B	A	B	A	B	B	B	B	A	B	B	B	A	A	A	A	B	A	B	A	B
chr7_60184798	chr7	60184798	B	B	B	H	B	B	A	B	*	A	B	A	B	A	A	B	B	A	B	B	B	*	*	*	A	A	B	A	B	*	B	*	B	B	A	B	B	B	A	A	A	*	B	A	A	A	B
chr7_60223531	chr7	60223531	B	B	B	A	B	B	A	B	A	A	B	A	B	A	A	B	B	A	B	B	B	A	B	A	A	A	B	H	B	A	B	B	B	B	A	B	B	B	A	A	A	A	B	A	A	A	B
chr7_60336789	chr7	60336789	B	B	B	H	B	B	A	B	A	A	B	A	B	A	A	B	B	A	B	B	B	A	B	A	A	A	B	A	B	A	B	B	B	B	A	B	A	B	A	A	A	A	B	A	A	A	A
chr7_60717128	chr7	60717128	B	B	B	H	B	B	A	B	A	A	B	A	B	A	A	B	B	A	B	B	B	A	B	A	A	A	B	A	B	A	B	B	B	B	A	B	A	B	A	A	A	A	B	A	A	A	A
chr7_60956427	chr7	60956427	B	B	B	A	B	B	A	B	A	A	B	A	B	A	A	B	B	A	B	B	A	A	B	A	A	A	B	A	B	A	B	B	B	B	A	B	A	B	A	A	A	A	B	A	A	A	A
chr7_61023929	chr7	61023929	B	B	B	A	B	B	A	B	A	A	B	A	B	B	A	B	B	A	B	B	A	A	B	A	A	A	B	H	B	A	B	B	B	B	A	B	A	B	A	A	A	A	B	A	A	A	A
chr7_61050070	chr7	61050070	B	B	B	A	B	B	A	B	A	A	B	A	B	B	A	B	B	A	B	B	A	A	B	A	A	A	B	H	B	H	B	B	B	B	A	B	A	B	A	A	A	A	B	A	A	A	A
chr7_61125907	chr7	61125907	B	B	B	A	B	B	A	B	A	A	B	A	B	H	A	B	B	B	B	B	A	A	B	A	A	A	B	H	B	A	B	B	B	B	A	B	A	B	A	A	A	A	B	A	A	A	A
chr7_61266038	chr7	61266038	B	B	B	A	B	B	A	B	A	A	B	A	B	B	A	B	B	B	B	B	A	A	B	A	A	A	B	A	B	H	B	B	B	B	A	B	A	B	A	A	A	A	B	A	A	A	A
chr7_61411562	chr7	61411562	B	B	B	A	H	B	A	B	A	A	B	A	B	B	A	B	B	B	B	B	A	A	B	A	A	A	B	A	B	A	B	B	B	B	A	B	A	B	A	A	A	A	B	A	A	A	A
chr7_61426698	chr7	61426698	B	B	B	A	A	B	A	B	A	A	B	A	B	B	A	B	B	B	B	B	A	A	B	A	A	A	B	A	B	A	B	B	B	B	A	B	A	B	A	*	A	A	B	A	A	A	A
chr7_61449575	chr7	61449575	B	B	B	A	A	B	A	B	A	A	B	A	B	B	A	B	B	B	B	B	A	A	B	A	A	A	B	A	B	A	B	B	B	B	A	B	A	B	A	B	A	A	B	A	A	A	A
chr7_61538773	chr7	61538773	B	B	B	A	A	B	A	B	A	A	B	A	B	B	A	B	B	B	B	B	A	A	B	A	A	A	B	A	B	A	B	B	B	B	A	B	A	B	A	*	A	A	B	A	A	A	A
chr7_61730738	chr7	61730738	B	B	B	B	A	B	A	B	B	A	B	B	B	B	A	B	B	B	B	B	A	A	B	A	A	B	B	A	B	A	B	B	B	B	A	B	A	*	A	*	*	A	B	A	B	A	A
chr7_61744817	chr7	61744817	B	B	B	H	A	B	A	B	*	A	B	A	B	B	A	B	B	B	B	B	A	A	B	A	A	A	B	A	B	A	B	B	B	B	A	B	A	B	A	*	B	A	B	A	*	A	A
chr7_61772365	chr7	61772365	B	B	B	H	H	B	A	B	A	A	B	A	B	B	A	B	B	B	B	B	A	A	B	A	A	A	B	A	B	A	B	B	B	B	A	B	A	B	A	B	B	A	B	A	A	A	A
chr7_61894184	chr7	61894184	B	B	B	B	A	B	A	B	A	A	B	A	B	B	A	B	B	B	B	B	A	A	B	A	A	A	B	A	B	H	B	B	B	B	A	B	B	B	A	*	B	A	B	A	A	A	A
chr7_61926110	chr7	61926110	B	B	B	B	A	B	A	B	A	A	B	A	B	B	A	B	B	B	B	B	A	A	B	A	A	A	B	A	B	A	B	B	B	B	A	B	B	B	A	A	B	A	B	A	A	A	A
chr7_62518735	chr7	62518735	B	B	B	B	A	A	A	B	A	A	B	B	B	B	A	B	B	B	B	B	A	A	B	B	A	A	B	A	B	A	B	B	B	B	A	B	B	A	A	A	B	A	B	A	A	A	A
chr7_62599773	chr7	62599773	B	B	B	B	A	A	A	B	A	A	B	B	B	B	A	B	B	B	B	B	A	A	B	B	A	A	B	A	B	A	B	B	B	B	A	B	B	A	A	B	B	A	B	A	A	A	A
chr7_62729899	chr7	62729899	B	B	B	H	A	A	A	B	A	A	B	B	B	H	A	B	B	B	B	B	A	A	B	B	A	A	B	A	B	A	B	B	B	B	A	B	B	A	A	*	B	A	B	A	A	A	B
chr7_62743110	chr7	62743110	B	B	B	B	A	A	A	B	A	A	B	B	B	B	A	B	B	B	B	B	A	A	B	B	A	A	B	A	B	A	B	B	B	B	A	B	B	A	A	*	B	A	B	A	A	A	B
chr7_62798214	chr7	62798214	B	B	B	B	A	A	A	B	A	A	B	B	B	B	A	B	B	B	A	B	A	A	B	B	A	*	B	A	B	A	B	B	B	B	A	B	B	A	A	A	B	A	B	A	A	A	B
chr7_62973407	chr7	62973407	B	B	B	B	B	A	B	B	A	A	B	B	B	B	A	B	B	B	A	B	A	A	B	B	A	A	B	A	B	A	B	B	B	B	A	B	B	A	A	A	B	A	B	A	A	A	A
chr7_63163954	chr7	63163954	B	B	B	B	B	A	B	B	B	A	B	B	B	B	A	H	B	B	A	B	A	A	B	B	A	B	B	A	B	A	B	B	B	B	A	B	B	A	A	B	B	*	B	A	B	A	A
chr7_63670667	chr7	63670667	B	B	B	B	B	A	B	B	A	A	B	B	B	B	B	A	B	B	A	B	A	A	B	B	A	A	B	A	B	A	B	B	B	B	A	B	B	B	A	A	B	A	B	A	A	A	A
chr7_63780398	chr7	63780398	B	B	B	B	B	A	B	B	*	A	B	B	B	B	B	A	B	B	A	B	A	A	B	B	A	*	B	A	B	A	B	B	B	B	A	B	B	B	A	*	B	A	B	A	*	A	A
chr7_64064519	chr7	64064519	B	B	B	B	B	A	B	B	A	A	B	B	B	B	B	H	B	B	A	B	A	A	B	B	A	A	B	A	B	H	B	B	B	B	A	B	B	B	A	A	B	A	B	A	A	A	A
chr7_64260733	chr7	64260733	B	B	B	B	B	A	B	B	A	A	B	B	B	B	B	A	B	B	A	B	A	A	B	B	A	A	B	A	B	H	B	B	B	B	A	B	B	B	A	A	B	A	B	A	A	A	A
chr8_446282	chr8	446282	B	A	B	A	B	A	B	B	A	B	B	B	B	A	B	A	B	B	A	A	B	B	A	B	B	*	B	A	A	B	A	A	A	A	B	A	B	A	A	B	B	A	A	A	B	A	A
chr8_611152	chr8	611152	B	A	B	A	B	A	B	B	A	B	B	B	B	A	B	A	B	B	A	A	B	B	A	B	B	A	B	A	A	B	A	A	A	A	B	A	B	A	A	B	B	A	A	A	A	A	A
chr8_692781	chr8	692781	B	A	B	A	B	A	*	B	A	B	B	*	B	H	B	*	B	B	A	A	B	A	A	B	B	A	B	A	A	*	H	A	A	A	B	A	B	A	A	B	B	A	A	A	A	A	A
chr8_853044	chr8	853044	B	B	B	A	B	A	B	B	A	B	B	B	B	H	B	A	B	B	A	A	B	*	A	B	B	*	B	A	A	H	A	A	A	A	B	A	B	A	A	B	B	A	A	A	*	A	A
chr8_1206359	chr8	1206359	B	B	B	A	B	A	B	B	A	B	B	B	B	A	B	H	B	B	A	A	B	A	A	B	B	A	B	A	A	H	A	*	A	A	B	A	B	A	A	B	B	A	A	A	A	A	B
chr8_1971948	chr8	1971948	B	B	B	H	B	A	B	B	A	B	B	B	B	A	B	H	B	B	A	A	B	A	A	B	B	*	B	A	B	B	A	A	A	A	B	A	B	A	A	B	B	A	A	A	A	A	B
chr8_2811650	chr8	2811650	B	B	A	A	B	B	B	B	A	B	B	B	B	H	B	A	A	B	A	B	B	A	A	B	B	*	B	A	B	B	A	H	A	A	B	A	B	A	A	B	A	A	A	A	B	A	B
chr8_2989612	chr8	2989612	B	B	A	H	B	B	B	B	A	B	B	B	B	A	B	A	A	B	A	B	B	A	A	A	B	B	B	A	B	B	A	B	A	A	B	A	B	A	A	B	A	A	A	A	B	A	B
chr8_3202689	chr8	3202689	B	B	A	A	B	B	B	B	A	A	B	B	B	A	B	B	A	B	A	B	B	B	A	A	B	B	B	A	B	B	A	H	A	A	B	A	B	A	A	B	A	A	A	A	B	A	B
chr8_3342715	chr8	3342715	B	B	A	A	H	B	B	B	A	A	B	B	B	A	B	B	A	B	A	B	B	A	A	A	B	B	B	A	B	B	A	B	A	A	B	A	B	A	A	A	A	B	A	A	B	B	B
chr8_3788819	chr8	3788819	B	B	A	A	B	B	B	B	A	B	B	B	B	A	B	B	A	B	A	B	A	*	A	A	A	B	B	A	B	B	A	B	A	A	B	A	B	A	A	*	A	B	A	H	B	B	B
chr8_3928857	chr8	3928857	B	B	A	A	H	B	B	B	A	B	B	B	B	H	B	B	A	B	A	B	A	A	A	A	A	A	B	A	B	B	*	B	A	A	B	A	B	A	A	B	A	*	A	A	B	B	B
chr8_4010667	chr8	4010667	B	B	A	A	*	B	B	B	A	B	B	B	B	A	B	B	A	B	A	B	A	B	A	A	A	B	B	B	B	B	A	B	A	A	B	A	B	A	A	B	A	B	A	A	B	B	B
chr8_4156071	chr8	4156071	B	B	A	A	B	A	B	B	A	B	B	B	B	H	B	B	A	B	A	B	A	B	A	A	A	B	B	B	B	B	A	B	A	A	B	A	B	A	A	B	A	B	A	A	B	B	B
chr8_4236728	chr8	4236728	B	B	A	A	B	A	B	A	A	B	A	B	B	A	B	B	A	B	A	B	A	B	A	A	A	B	B	B	B	B	A	B	A	A	B	A	B	A	A	A	A	B	A	A	B	B	A
chr8_4305844	chr8	4305844	B	B	A	A	A	A	B	A	A	B	A	B	A	H	B	H	A	B	A	B	A	B	A	A	A	*	B	B	B	B	A	A	A	A	B	A	B	A	A	A	A	*	A	A	B	B	A
chr8_4706385	chr8	4706385	B	B	A	A	A	B	*	A	A	B	A	B	A	A	B	B	A	B	A	B	A	B	A	A	B	B	B	B	B	B	A	A	A	A	B	A	B	A	A	B	*	B	A	A	B	B	A
chr8_5313291	chr8	5313291	B	B	A	A	A	B	B	A	A	B	A	B	A	A	B	H	A	B	A	B	A	B	A	A	B	A	B	B	B	B	A	A	A	A	B	A	B	A	A	B	A	B	A	A	B	B	A
chr8_5466697	chr8	5466697	B	B	A	A	A	B	B	A	A	B	A	B	A	A	B	H	A	B	A	B	A	B	A	A	B	B	B	B	B	B	A	A	A	A	B	A	B	A	A	B	A	B	A	A	A	B	A
chr8_5578004	chr8	5578004	B	B	A	A	A	B	B	A	A	B	A	A	A	H	B	B	A	B	A	B	A	B	A	A	B	A	B	B	B	B	A	A	A	A	B	A	B	A	A	B	A	B	A	A	A	B	A
chr8_6379587	chr8	6379587	B	B	A	A	A	B	A	A	A	B	A	*	A	A	B	H	A	B	A	B	A	B	A	A	B	*	B	B	B	B	A	A	A	B	B	A	B	A	A	*	A	B	A	A	A	B	A
chr8_6557557	chr8	6557557	A	B	A	A	A	B	A	A	A	B	A	A	A	A	B	H	A	B	A	B	A	B	A	A	B	A	B	B	B	B	A	A	A	B	B	A	B	A	A	A	A	B	A	A	A	B	A
chr8_6682264	chr8	6682264	A	B	A	A	A	B	A	A	A	B	A	A	A	A	B	H	A	B	B	B	A	B	A	A	B	A	B	B	B	B	A	A	A	A	B	A	B	A	A	A	A	B	A	H	A	B	A
chr8_7886046	chr8	7886046	A	B	A	A	A	B	A	A	A	B	A	A	A	A	B	B	A	B	B	B	A	B	A	A	B	A	B	B	A	B	A	A	*	B	B	A	B	H	A	A	A	B	B	B	A	B	A
chr8_9569731	chr8	9569731	A	B	A	A	A	B	A	A	A	B	A	B	A	A	H	H	A	B	B	B	A	B	A	A	B	B	B	B	A	B	A	A	B	B	B	A	B	H	A	B	A	B	B	B	A	B	A
chr8_9757739	chr8	9757739	A	A	A	A	A	B	A	A	A	B	A	B	A	A	B	H	A	B	B	B	A	B	A	A	B	B	B	B	A	B	A	A	B	B	B	A	B	H	A	B	A	B	B	B	A	B	A
chr8_10182818	chr8	10182818	A	A	A	A	A	B	A	A	A	B	A	B	A	A	B	B	A	B	B	B	A	B	A	A	B	B	B	B	A	B	A	A	B	B	B	A	B	H	A	B	A	B	B	B	A	B	A
chr8_16864071	chr8	16864071	A	A	A	A	A	B	A	A	A	B	A	B	A	A	B	B	A	B	B	B	A	B	A	A	B	B	A	B	A	B	A	A	B	B	A	A	B	H	A	B	A	B	B	B	A	B	A
chr8_37480788	chr8	37480788	A	A	A	A	A	B	A	A	A	B	A	*	A	A	B	B	A	B	B	B	A	B	A	A	B	*	A	B	A	B	A	A	*	B	A	A	B	H	A	A	A	B	B	B	A	B	A
chr8_41632275	chr8	41632275	A	A	A	A	A	B	A	A	A	B	A	*	A	A	B	B	A	B	B	B	A	B	A	A	B	A	A	B	A	B	A	A	*	B	A	A	B	H	A	*	A	B	B	B	A	B	A
chr8_43674390	chr8	43674390	A	A	A	A	A	B	A	A	A	B	A	B	A	A	B	H	A	B	B	B	A	B	A	A	B	A	A	B	A	B	A	A	B	B	A	A	B	*	A	H	A	B	B	B	A	B	A
chr8_44549506	chr8	44549506	A	A	A	A	A	B	A	A	A	B	A	*	A	A	B	B	A	B	B	B	A	B	A	A	B	A	A	B	A	B	A	A	*	B	A	A	B	H	A	A	A	B	B	B	A	B	A
chr8_45787856	chr8	45787856	A	A	B	A	A	B	A	A	A	B	A	A	A	A	B	H	A	A	B	B	A	B	A	A	B	A	A	B	A	H	A	B	A	B	A	A	B	H	B	A	A	B	B	B	A	B	A
chr8_46780207	chr8	46780207	A	A	B	A	A	B	A	A	A	A	A	B	A	A	B	H	A	A	A	B	A	B	A	A	B	A	A	A	A	B	A	A	A	A	B	A	B	H	B	B	A	B	B	B	A	B	A
chr8_47169849	chr8	47169849	A	A	B	A	A	B	A	A	A	A	A	A	A	A	B	H	A	A	A	B	A	B	A	A	B	A	A	A	A	B	A	A	A	A	B	A	B	H	B	A	A	B	B	B	A	B	A
chr8_47420395	chr8	47420395	A	A	B	A	A	B	A	A	A	A	B	B	A	A	B	H	A	A	A	B	A	B	B	A	B	B	A	A	A	B	A	A	A	A	B	A	B	H	B	B	B	B	B	B	A	B	A
chr8_47430548	chr8	47430548	A	A	B	A	A	B	A	A	A	A	B	*	A	A	B	H	A	A	A	B	A	B	B	A	B	B	A	A	A	B	A	A	A	A	B	A	B	H	B	*	B	B	B	B	A	B	A
chr8_47601768	chr8	47601768	A	A	B	A	A	B	A	A	A	A	B	A	A	A	B	H	A	A	A	B	A	B	B	B	B	B	A	A	A	B	A	A	A	A	B	A	B	H	A	*	B	B	B	B	A	B	A
chr8_47861313	chr8	47861313	A	A	B	A	A	B	A	A	A	A	B	A	A	A	B	H	A	A	A	B	A	B	B	B	B	B	A	A	A	B	A	A	A	A	B	A	B	H	A	A	B	B	B	B	A	B	A
chr8_47894386	chr8	47894386	A	A	B	B	A	B	A	A	A	A	B	A	A	A	B	H	A	A	A	B	A	B	B	B	B	B	A	A	A	B	A	A	A	A	B	A	B	H	A	A	B	B	B	B	A	B	A
chr8_48335126	chr8	48335126	A	A	B	B	A	B	A	A	A	A	B	A	A	A	B	B	A	A	A	B	A	B	B	A	A	B	A	A	B	B	A	A	A	A	B	A	B	H	A	B	B	A	B	B	A	B	A
chr8_48506128	chr8	48506128	A	A	B	B	A	A	A	A	A	A	B	A	A	H	B	A	A	A	A	B	A	B	B	A	A	B	A	A	B	B	A	A	B	A	B	A	B	H	A	B	B	A	B	B	A	B	A
chr8_48634884	chr8	48634884	A	A	B	H	A	A	A	A	A	A	B	A	A	A	B	A	A	A	A	B	A	B	B	A	A	B	A	A	B	B	A	A	B	A	B	A	B	H	A	B	B	A	B	B	A	B	A
chr8_48792680	chr8	48792680	A	A	B	B	A	*	*	A	A	A	B	A	A	H	B	A	A	A	A	B	A	B	B	A	A	B	A	A	B	B	*	A	B	A	B	A	B	H	A	B	B	A	B	B	A	B	A
chr8_49121771	chr8	49121771	A	A	B	B	H	A	A	A	A	A	B	A	A	H	B	A	A	A	A	B	A	B	B	B	A	B	A	A	B	B	A	A	B	A	B	A	B	H	A	B	B	A	B	B	A	B	A
chr8_49136780	chr8	49136780	A	A	B	B	H	A	A	A	*	A	B	A	A	H	B	A	A	A	A	B	A	B	B	B	A	B	A	A	B	B	A	*	B	A	B	A	B	H	A	B	B	A	B	B	A	B	A
chr8_49299411	chr8	49299411	A	A	B	H	A	A	*	A	A	A	B	A	A	A	H	A	A	A	A	B	A	B	B	B	A	B	A	A	H	B	A	*	B	A	B	A	B	H	A	B	B	A	B	B	A	B	A
chr8_49486219	chr8	49486219	A	A	B	H	A	A	B	A	A	A	B	A	A	H	B	A	A	A	A	B	A	B	B	B	A	B	A	A	H	B	A	A	B	A	A	A	B	B	A	B	B	A	B	B	A	B	A
chr8_49718221	chr8	49718221	A	A	A	B	A	A	B	A	A	A	B	A	A	A	B	A	A	A	A	B	A	A	B	B	A	B	A	A	A	B	A	A	B	A	A	A	B	H	A	B	B	A	A	B	A	B	A
chr8_50098362	chr8	50098362	A	A	A	H	A	A	B	A	A	A	B	A	A	A	B	A	A	A	A	B	A	A	B	B	A	B	A	A	A	B	B	A	B	A	A	A	B	H	A	B	B	A	A	B	A	B	A
chr8_50171706	chr8	50171706	B	A	A	B	A	A	B	A	A	A	B	A	A	A	B	A	A	A	A	B	A	B	B	B	A	B	A	A	A	B	B	A	B	A	A	A	B	H	A	B	B	A	A	B	A	B	A
chr8_50938116	chr8	50938116	A	H	A	H	A	A	B	A	A	A	B	A	A	A	B	A	A	A	A	B	A	B	A	B	A	B	A	A	A	B	B	B	B	A	A	A	B	B	A	B	B	A	A	B	A	B	B
chr8_50990405	chr8	50990405	A	B	A	H	A	A	B	A	A	A	B	A	A	A	B	A	A	A	A	B	A	B	A	B	A	B	A	A	A	B	B	B	B	A	A	A	B	B	A	B	B	A	A	B	A	B	B
chr8_51049318	chr8	51049318	A	B	A	B	A	A	B	A	A	A	B	A	A	A	A	A	A	A	A	B	A	B	A	B	A	B	A	A	A	B	B	B	B	A	A	A	B	B	A	B	B	A	A	B	A	B	B
chr8_51430897	chr8	51430897	A	B	A	H	A	A	H	A	A	A	B	A	A	A	A	A	A	A	A	B	A	B	A	B	A	B	A	A	A	B	B	B	B	A	A	A	B	B	A	B	B	A	A	B	A	B	B
chr8_51833682	chr8	51833682	A	B	A	B	A	A	*	A	A	A	B	A	A	A	A	A	A	A	A	B	A	B	A	B	A	B	A	B	A	B	B	B	B	A	A	A	B	B	A	B	B	A	A	B	A	B	B
chr8_51940069	chr8	51940069	A	B	A	B	A	A	H	A	A	A	B	A	A	A	A	A	A	A	A	B	A	B	A	B	A	B	A	B	A	B	B	B	B	A	A	A	B	H	A	B	B	A	A	B	A	B	B
chr8_51992189	chr8	51992189	A	B	A	H	A	A	H	A	A	A	B	A	A	A	A	A	A	A	A	B	A	B	A	B	A	B	A	B	A	H	B	B	A	A	A	A	B	B	A	B	B	A	A	B	A	B	B
chr8_52047836	chr8	52047836	A	B	A	H	A	A	H	A	A	A	B	A	A	A	A	A	A	A	A	B	A	B	B	B	A	B	A	B	A	B	B	B	B	A	A	A	B	B	A	B	B	A	A	B	A	B	B
chr8_52268251	chr8	52268251	A	B	A	B	A	A	H	A	A	A	B	A	A	A	A	A	A	A	A	B	A	B	B	B	A	B	A	B	A	B	B	B	*	A	A	A	B	B	A	B	B	A	A	B	A	B	B
chr8_52289697	chr8	52289697	A	B	A	H	A	A	H	A	A	A	B	A	A	A	A	A	A	A	A	B	B	B	B	B	A	B	A	B	A	B	B	B	A	A	A	A	B	H	A	B	B	A	A	B	A	B	B
chr8_52444464	chr8	52444464	A	B	A	H	A	A	*	A	A	A	B	A	A	A	A	A	A	A	A	B	B	B	B	B	A	B	A	B	*	B	B	B	A	A	A	A	A	H	A	*	B	A	A	B	A	B	B
chr8_52467985	chr8	52467985	A	B	A	B	A	A	H	A	A	A	B	A	A	A	A	A	A	A	A	B	B	B	B	B	A	B	A	B	A	B	B	B	B	A	A	A	A	A	A	B	B	A	A	B	A	B	B
chr8_52578484	chr8	52578484	A	B	A	H	A	A	B	A	A	A	B	A	A	A	A	A	A	A	A	B	B	B	B	B	A	B	A	B	A	A	B	B	*	A	A	H	A	A	A	B	B	A	A	B	A	B	B
chr8_52622412	chr8	52622412	A	B	A	B	A	A	B	A	A	H	B	A	A	A	A	A	A	A	A	B	B	B	B	B	A	B	A	B	A	A	B	B	A	A	A	H	A	A	A	B	B	A	A	B	A	B	B
chr8_52823320	chr8	52823320	A	B	A	H	A	A	B	A	A	A	B	A	A	A	A	A	A	A	A	B	B	B	B	B	A	B	A	B	A	A	B	B	A	A	A	H	A	A	A	B	B	A	A	B	A	B	B
chr8_53062969	chr8	53062969	A	B	A	B	A	*	B	A	A	A	B	A	A	A	A	A	A	A	A	B	B	B	B	B	A	B	A	B	*	A	A	B	B	A	A	H	A	A	A	B	B	A	A	B	A	B	B
chr8_53274323	chr8	53274323	A	B	A	B	A	A	B	A	A	A	A	A	A	A	A	A	B	A	A	B	B	B	B	B	A	B	A	B	A	A	A	B	A	A	A	H	A	A	A	B	B	A	A	B	A	B	B
chr8_53285322	chr8	53285322	A	B	A	B	A	*	B	A	A	A	A	A	A	A	A	A	B	A	A	B	B	B	B	B	A	B	A	B	A	A	A	B	A	A	A	H	A	A	A	B	B	A	A	B	A	B	B
chr8_53382772	chr8	53382772	H	B	A	B	A	A	B	A	A	A	A	A	A	A	A	A	B	A	A	B	B	B	B	B	A	B	A	B	A	A	A	B	A	A	A	H	A	A	A	B	B	A	A	B	A	B	B
chr8_53662156	chr8	53662156	A	B	A	B	A	A	B	A	A	A	A	A	A	A	A	A	B	A	A	B	B	B	B	B	A	B	A	B	A	B	A	B	A	A	A	H	A	A	A	B	B	A	A	B	A	B	B
chr8_53817625	chr8	53817625	A	B	A	B	A	A	B	A	A	A	A	A	A	A	A	A	B	A	A	B	B	B	B	B	A	B	A	B	A	B	A	B	B	A	A	A	A	A	A	B	A	A	A	B	A	B	B
chr8_54077361	chr8	54077361	A	B	A	B	A	A	B	A	A	A	A	A	A	A	A	A	B	A	A	B	B	B	B	B	A	B	A	B	A	B	A	B	*	A	A	A	A	A	A	B	A	A	A	B	*	B	B
chr8_54308046	chr8	54308046	A	B	A	B	A	A	B	A	A	A	A	A	A	A	A	A	B	A	A	B	B	B	B	B	A	B	A	B	A	B	A	B	B	A	A	A	A	A	A	B	A	A	A	B	B	B	A
chr8_55311370	chr8	55311370	A	B	A	B	A	A	B	A	A	A	A	A	A	A	A	A	B	A	A	B	B	B	B	B	A	B	A	A	A	B	A	B	*	A	A	A	A	A	A	B	A	A	A	B	*	B	A
chr8_55201700	chr8	55201700	A	B	A	B	A	A	*	A	A	A	A	*	A	A	A	A	B	A	A	B	B	B	B	B	A	B	A	A	A	B	A	B	*	A	A	A	A	A	A	B	A	A	A	B	*	B	A
chr9_564242	chr9	564242	B	B	B	B	B	B	B	B	A	A	B	A	B	B	B	H	A	A	B	A	B	B	A	B	A	B	A	A	B	A	B	A	B	A	A	B	A	A	A	A	H	B	A	A	A	B	A
chr9_1225944	chr9	1225944	B	A	B	B	B	B	B	B	B	A	B	B	B	B	B	H	A	A	B	A	B	B	A	B	A	B	A	A	B	A	B	A	B	A	A	B	A	A	A	B	A	B	A	A	B	B	A
chr9_1557276	chr9	1557276	B	A	B	B	B	B	B	B	*	A	B	*	B	B	B	H	A	A	B	A	B	B	A	B	A	B	B	A	B	A	B	H	B	A	A	B	A	A	A	*	B	B	A	A	*	B	A
chr9_1949080	chr9	1949080	B	A	B	B	B	B	A	B	B	A	B	B	B	H	B	H	A	A	B	A	B	B	A	B	A	A	B	A	B	H	B	B	B	A	A	B	A	A	A	B	B	B	H	H	B	B	A
chr9_1990171	chr9	1990171	B	B	B	H	B	B	A	B	B	A	B	B	B	A	A	A	A	A	B	A	B	B	A	B	A	A	B	A	B	A	B	B	B	A	A	B	A	A	A	B	B	B	A	A	B	B	A
chr9_2294796	chr9	2294796	B	B	B	A	B	B	A	B	A	A	B	A	B	A	A	H	A	A	B	A	B	B	A	B	B	A	B	A	B	A	B	B	B	A	A	B	A	A	A	A	B	B	A	A	A	B	A
chr9_2442214	chr9	2442214	B	B	A	A	B	B	A	B	*	A	B	*	B	A	A	H	B	A	B	A	B	B	B	B	B	B	B	A	B	A	B	B	B	A	A	B	A	A	A	*	A	B	A	A	*	B	B
chr9_2563101	chr9	2563101	B	B	A	A	B	*	A	B	*	A	B	*	B	A	A	H	B	A	B	A	B	B	B	B	B	*	B	A	B	A	B	B	B	A	A	B	A	A	A	B	A	B	A	A	*	B	B
chr9_2788428	chr9	2788428	B	B	A	A	B	B	A	B	A	A	B	A	B	A	A	B	B	A	B	A	B	B	B	B	B	B	B	A	B	A	B	B	B	A	A	B	A	A	A	A	A	B	A	A	A	B	B
chr9_2936425	chr9	2936425	B	B	A	H	B	B	A	B	A	A	B	A	B	A	A	B	B	A	B	A	B	B	B	B	B	B	B	A	B	A	B	B	B	A	A	A	A	A	A	A	A	B	A	A	A	B	A
chr9_3127270	chr9	3127270	B	B	B	H	B	B	A	B	*	A	B	*	B	A	A	B	B	A	B	A	B	B	A	B	B	B	B	A	B	A	B	B	B	A	A	A	A	A	A	*	A	B	A	A	*	B	B
chr9_3196033	chr9	3196033	B	B	B	A	B	B	A	B	B	A	B	B	B	A	A	B	B	A	B	A	B	B	A	B	B	A	B	A	B	A	B	B	B	A	A	A	A	A	A	B	A	B	A	A	B	B	B
chr9_3558148	chr9	3558148	B	B	A	A	B	B	A	B	B	A	B	B	B	A	A	B	B	A	B	A	B	B	A	B	B	A	B	A	H	A	B	B	B	A	A	A	A	A	*	B	A	B	A	A	B	B	B
chr9_3950379	chr9	3950379	B	B	A	A	B	B	A	B	A	A	B	A	B	A	A	B	B	A	B	A	B	B	A	B	B	A	B	A	H	A	B	B	B	A	A	A	A	A	*	B	A	B	A	A	A	B	B
chr9_4160516	chr9	4160516	B	B	A	A	B	B	A	B	B	A	B	B	B	A	A	B	B	A	B	A	B	H	A	B	B	A	B	A	H	A	B	B	B	A	A	A	A	A	B	A	A	B	A	A	B	B	B
chr9_4369235	chr9	4369235	B	B	A	H	B	B	A	B	*	A	B	*	B	A	A	B	B	A	B	A	B	B	A	B	B	A	B	A	H	A	B	B	B	A	A	A	A	A	B	A	A	B	A	A	*	B	B
chr9_4570180	chr9	4570180	B	B	A	A	B	B	A	B	A	A	B	B	B	A	A	B	B	A	B	A	B	B	A	B	B	A	A	A	A	A	B	B	B	A	B	A	A	A	B	A	A	B	A	A	B	B	B
chr9_5248301	chr9	5248301	B	B	A	A	B	A	A	B	A	A	B	B	B	A	A	B	B	A	B	A	B	B	A	B	B	A	A	A	A	A	B	B	B	A	B	A	A	A	*	A	A	B	A	A	*	B	B
chr9_5335038	chr9	5335038	B	B	A	A	H	A	A	H	A	A	B	B	B	A	A	B	B	A	B	A	B	B	A	B	B	A	A	A	A	A	B	B	B	A	B	A	A	A	*	A	A	B	A	A	*	B	B
chr9_5623791	chr9	5623791	B	B	A	A	B	*	A	B	A	A	B	B	B	A	A	B	B	A	B	A	B	B	B	B	B	A	A	A	A	A	B	B	A	A	A	A	A	A	A	A	A	B	A	A	*	B	B
chr9_6280598	chr9	6280598	B	B	A	A	B	A	A	B	A	A	B	B	B	A	A	B	B	A	B	A	B	B	B	A	B	A	A	A	A	A	B	H	A	A	A	A	A	A	B	A	A	A	A	A	*	B	B
chr9_6461033	chr9	6461033	B	B	A	A	H	A	A	B	A	A	B	B	B	A	A	B	B	B	B	A	B	B	B	A	B	A	A	A	A	A	B	H	A	A	A	A	A	A	*	A	A	A	A	A	A	B	B
chr9_6835934	chr9	6835934	B	B	A	A	B	A	A	B	A	A	B	B	B	A	A	B	B	B	B	A	B	B	B	A	B	A	A	A	A	A	B	A	A	A	A	A	A	A	A	A	A	A	A	A	B	B	B
chr9_8098396	chr9	8098396	B	B	A	A	B	A	A	B	A	A	H	B	B	A	B	B	B	B	A	A	B	B	B	A	B	A	A	A	A	A	B	A	A	A	A	A	A	A	A	A	A	A	A	A	A	B	B
chr9_10400036	chr9	10400036	B	B	A	A	B	A	A	B	A	A	A	B	B	H	B	B	B	B	A	A	B	B	B	A	B	A	B	A	A	A	B	A	A	A	A	A	A	B	A	A	A	A	A	A	A	B	B
chr9_10659182	chr9	10659182	B	B	A	H	B	A	A	B	*	A	A	B	B	H	B	B	B	B	A	A	B	B	B	A	B	A	B	A	A	A	B	A	A	A	A	A	A	B	*	A	A	A	A	A	*	B	B
chr9_11693305	chr9	11693305	B	B	A	A	B	A	A	B	B	A	A	B	B	A	B	B	B	B	A	A	B	B	B	A	B	A	B	A	A	A	B	A	A	A	A	A	A	B	B	A	A	A	A	A	B	B	B
chr9_14626500	chr9	14626500	B	B	A	A	B	A	A	B	A	A	A	B	B	A	B	H	B	B	A	A	B	H	B	A	B	A	B	A	A	A	B	A	A	A	A	A	A	B	A	A	A	B	A	A	A	B	B
chr9_40552899	chr9	40552899	B	B	A	A	B	A	A	B	B	A	A	B	B	A	B	H	B	B	A	A	B	B	B	A	B	A	B	A	A	A	B	A	A	A	A	A	A	B	B	A	A	B	A	A	B	B	B
chr9_45683462	chr9	45683462	B	B	A	A	H	A	A	B	A	A	A	B	B	A	B	A	B	B	A	A	B	B	A	A	B	A	B	A	A	B	B	B	A	A	A	A	A	B	A	A	B	B	A	A	B	B	B
chr9_47301112	chr9	47301112	B	B	A	A	B	A	A	B	A	A	A	B	B	B	B	A	B	B	A	A	B	B	A	A	B	B	B	A	A	H	B	B	A	A	B	A	A	B	B	A	B	B	A	A	B	B	B
chr9_48343636	chr9	48343636	B	B	A	H	B	A	A	B	A	A	A	B	B	A	B	H	B	B	A	A	B	H	A	A	B	B	B	A	A	A	B	B	A	A	B	A	A	B	B	B	A	B	A	A	B	B	B
chr9_48393924	chr9	48393924	B	B	A	H	B	A	A	B	A	A	A	B	B	A	B	H	B	B	A	A	B	B	A	A	B	*	B	A	A	A	B	B	A	A	B	A	A	B	*	B	A	B	A	A	*	B	B
chr9_49059724	chr9	49059724	B	B	A	A	B	A	A	B	A	A	A	B	B	A	B	H	B	B	A	A	B	B	A	A	B	*	B	A	A	A	B	B	A	A	A	A	A	B	*	B	A	B	A	A	*	B	B
chr9_49270730	chr9	49270730	B	B	A	A	B	A	A	B	A	A	A	B	B	H	B	A	B	B	A	A	B	B	A	A	B	B	B	A	A	A	B	A	A	A	A	A	A	B	B	B	A	B	A	A	B	B	B
chr9_49630252	chr9	49630252	B	B	A	A	B	A	A	B	A	A	A	B	B	A	B	H	B	B	A	A	B	B	A	A	B	A	B	A	B	A	B	A	A	A	B	A	A	B	A	B	A	H	A	A	A	B	B
chr9_49647362	chr9	49647362	B	B	A	A	B	A	A	B	A	A	A	B	B	A	B	A	B	B	*	A	B	B	A	A	B	B	B	A	B	A	B	A	A	A	B	A	A	B	B	B	A	H	B	A	B	B	B
chr9_49929892	chr9	49929892	B	B	B	A	B	A	A	B	A	A	A	B	B	H	B	H	B	B	A	A	B	B	A	A	B	B	B	A	B	A	B	A	B	A	B	A	A	A	B	A	A	H	B	A	B	B	B
chr9_50064228	chr9	50064228	B	B	B	A	B	A	A	B	A	A	H	B	B	A	B	H	B	B	A	A	A	B	A	A	B	A	B	A	B	A	B	A	B	A	B	A	A	A	B	A	A	H	B	A	A	B	B
chr9_50158092	chr9	50158092	B	B	B	A	B	A	A	B	A	A	H	B	B	A	B	A	B	B	A	A	A	B	A	A	B	*	B	A	B	A	B	A	B	A	B	A	A	A	B	*	A	A	B	A	*	B	B
chr9_50215869	chr9	50215869	B	B	B	A	B	A	A	B	A	A	H	B	B	A	B	A	B	B	A	A	A	B	A	A	B	B	B	A	B	A	B	A	B	A	B	A	A	A	B	B	A	H	B	A	B	B	B
chr9_50506179	chr9	50506179	B	B	B	H	B	A	A	B	A	A	H	B	B	A	B	H	B	B	A	A	A	B	A	A	B	B	B	A	B	A	B	A	B	A	B	A	A	H	B	A	A	H	B	A	B	B	B
chr9_50963805	chr9	50963805	B	B	B	A	B	A	A	B	B	A	H	B	B	H	B	A	A	B	B	A	A	B	A	A	B	B	B	A	B	A	B	A	B	A	B	A	A	A	B	B	A	A	B	A	B	B	B
chr9_51294746	chr9	51294746	B	B	B	A	B	A	A	B	B	A	H	B	B	H	B	H	A	B	B	A	A	B	A	A	B	B	B	A	B	B	B	A	B	A	B	A	A	A	A	A	A	A	B	A	B	B	B
chr9_51499502	chr9	51499502	B	B	B	A	B	A	A	B	B	A	H	B	B	A	B	H	A	B	B	A	A	B	A	A	B	*	B	A	B	B	B	A	B	A	B	A	A	A	*	*	A	A	B	A	B	B	B
chr9_51766897	chr9	51766897	B	B	B	A	B	A	A	B	B	A	H	B	B	A	B	H	A	B	B	A	A	B	A	A	B	B	B	A	B	B	B	A	B	A	B	A	A	A	B	B	A	A	B	A	B	B	B
chr9_51874269	chr9	51874269	B	B	B	H	B	A	A	B	B	A	H	B	B	H	B	H	A	B	B	A	A	B	A	A	B	A	B	B	B	B	B	A	B	A	B	A	A	A	A	B	A	A	B	A	B	B	B
chr9_52410357	chr9	52410357	B	B	A	H	B	A	A	B	A	A	H	B	B	A	B	H	A	B	B	A	A	A	A	A	B	A	B	B	B	B	B	A	B	A	B	A	A	A	B	B	A	A	B	A	A	B	B
chr9_52835206	chr9	52835206	B	B	A	A	A	A	A	B	A	A	H	B	A	A	B	A	A	B	B	A	A	A	A	A	B	A	B	B	B	B	B	A	B	A	A	A	A	A	A	B	A	A	B	A	A	B	B
chr9_52886427	chr9	52886427	B	B	A	A	A	A	A	B	*	A	A	B	A	A	B	A	A	B	B	A	A	*	A	A	B	*	B	B	B	B	B	A	B	A	A	A	A	A	A	B	A	A	B	A	*	B	B
chr9_52906082	chr9	52906082	B	B	A	A	A	A	A	B	A	A	H	B	A	A	B	A	A	B	B	A	A	A	A	A	B	A	B	B	B	A	B	A	B	A	A	A	A	A	A	B	A	A	B	A	A	B	B
chr9_52969640	chr9	52969640	B	H	A	A	A	A	A	B	B	A	H	B	A	A	B	A	A	B	B	A	A	B	A	A	B	B	B	B	B	A	B	A	B	A	A	A	A	A	B	B	A	A	B	A	B	B	B
chr9_53013371	chr9	53013371	B	A	A	A	A	*	A	B	B	A	H	B	A	A	B	A	A	B	B	A	A	B	A	A	B	B	B	B	B	A	B	A	B	A	A	A	A	A	*	B	A	A	B	A	B	B	B
chr9_53258663	chr9	53258663	B	A	A	H	A	A	A	B	B	A	H	*	A	A	B	A	A	B	B	A	A	H	A	A	B	B	A	B	B	A	B	A	B	A	A	A	A	A	B	B	A	A	B	A	B	B	B
chr9_53326689	chr9	53326689	B	A	A	H	H	A	A	B	B	A	H	B	A	A	B	A	A	B	B	A	A	B	A	A	B	B	A	B	B	A	B	*	B	A	A	A	A	A	B	B	A	B	B	A	B	B	B
chr9_53389402	chr9	53389402	B	A	A	B	A	A	A	B	*	A	H	A	A	H	B	A	A	B	B	A	A	*	A	A	B	*	A	B	B	A	*	A	B	A	A	A	A	A	*	B	A	B	B	A	*	B	B
chr9_53507652	chr9	53507652	B	A	A	H	A	A	A	B	A	A	H	A	A	A	B	A	A	B	B	A	A	A	A	A	B	A	A	B	B	A	B	A	B	A	A	A	A	A	A	B	A	B	B	A	A	B	B
chr9_54328355	chr9	54328355	B	A	A	B	A	A	A	B	*	A	H	*	A	A	A	A	A	B	B	A	A	*	A	A	B	*	A	A	B	A	B	A	B	A	A	A	A	A	*	B	A	B	B	H	*	B	B
chr9_54719692	chr9	54719692	B	H	A	H	A	A	A	B	B	A	H	B	A	A	A	A	A	B	B	A	A	B	A	A	B	A	A	A	B	A	*	A	A	A	A	A	A	A	B	B	A	B	B	A	B	B	B
chr9_55162745	chr9	55162745	B	A	A	B	A	A	A	B	B	A	H	B	A	A	A	A	A	B	B	A	A	B	A	A	B	B	A	A	B	A	B	A	B	A	A	A	A	A	B	B	A	B	A	A	B	B	A
chr9_55703945	chr9	55703945	B	A	A	B	A	A	A	B	A	A	H	A	A	A	A	A	A	B	B	A	A	A	A	A	B	A	A	A	B	A	B	A	A	A	A	A	A	A	A	B	A	B	A	A	A	B	A
chr9_55962698	chr9	55962698	B	A	A	B	A	A	A	B	A	A	A	A	A	A	A	A	A	B	B	A	A	A	A	A	B	A	A	A	B	A	B	A	*	A	A	A	A	A	A	B	A	B	A	A	A	B	A
chr9_56249642	chr9	56249642	B	A	A	B	A	A	A	B	A	A	A	A	A	A	A	A	A	B	B	A	A	A	A	A	B	A	A	A	B	A	B	A	*	A	A	A	A	B	A	B	A	B	A	A	A	B	A
chr9_56292752	chr9	56292752	B	A	A	H	A	A	A	B	A	A	A	A	A	A	A	A	A	B	B	A	A	A	A	A	B	A	A	A	B	A	B	A	*	A	A	A	A	B	A	B	A	B	A	A	A	B	A
chr9_56807985	chr9	56807985	B	A	A	H	A	A	A	B	A	A	A	A	A	A	A	A	A	B	B	A	A	B	A	A	B	A	A	A	B	H	B	A	A	A	A	A	A	B	A	B	A	B	A	A	A	B	A
chr9_56898169	chr9	56898169	B	A	A	B	A	A	A	B	A	A	A	A	A	A	A	A	A	B	B	A	A	B	A	A	B	A	A	A	B	A	B	A	B	A	A	A	A	B	A	B	A	B	A	A	A	B	A
chr9_56928104	chr9	56928104	B	A	A	B	A	A	A	B	A	A	A	A	A	A	B	A	A	B	B	A	A	B	A	A	B	A	A	H	B	A	B	A	A	A	A	A	A	B	A	B	A	B	A	A	A	B	A
chr9_57345812	chr9	57345812	B	A	A	B	A	A	A	B	*	A	A	A	A	A	B	A	A	B	B	A	A	B	A	A	B	A	A	H	B	A	B	A	*	A	A	A	A	B	A	B	A	B	A	A	*	B	A
chr9_57549773	chr9	57549773	B	A	A	H	A	A	A	B	B	A	A	A	A	A	B	A	A	B	B	A	A	B	A	A	B	A	A	A	B	A	B	A	B	A	A	A	A	B	A	B	A	B	A	A	B	B	A
chr9_57900905	chr9	57900905	B	A	B	B	A	A	A	B	A	A	A	A	A	A	A	A	A	B	B	A	A	B	A	A	B	A	A	A	B	H	B	A	A	A	A	A	A	B	A	B	A	B	A	A	A	B	A
chr9_57956950	chr9	57956950	B	A	B	B	A	A	A	B	*	A	A	A	A	A	A	A	A	B	B	A	A	B	A	A	B	A	A	A	B	A	B	A	*	A	A	A	A	B	A	B	A	B	A	A	*	B	A
chr9_57984453	chr9	57984453	B	A	B	H	A	A	A	B	*	A	A	B	A	A	A	A	A	B	B	A	A	B	A	A	B	A	A	A	B	A	B	A	*	A	A	A	A	B	A	B	A	B	A	A	*	A	A
chr9_58128527	chr9	58128527	B	A	B	H	A	A	A	B	A	A	A	B	A	A	A	A	A	B	B	A	A	B	A	A	B	A	A	A	B	A	B	A	A	A	A	A	A	B	A	B	A	B	A	A	A	A	A
chr9_58416429	chr9	58416429	B	A	B	B	A	A	A	B	*	A	A	B	A	A	A	A	A	B	B	A	A	B	A	A	B	A	A	A	B	A	B	A	*	A	A	A	A	B	A	B	A	B	A	B	*	A	A
chr9_58541027	chr9	58541027	B	A	B	H	A	A	A	B	*	A	A	B	A	A	A	A	A	B	B	A	A	B	A	A	B	A	A	A	B	A	B	A	*	A	A	A	A	B	A	B	A	B	A	B	*	A	A
chr9_58819358	chr9	58819358	B	A	B	H	A	A	A	B	B	A	A	B	A	A	A	A	A	B	B	A	A	B	A	A	B	A	A	A	B	A	B	A	B	A	A	A	A	B	A	B	A	B	A	B	B	A	A
chr9_58963611	chr9	58963611	B	A	B	H	A	A	A	B	A	A	A	B	A	A	A	A	A	B	B	A	A	B	A	A	A	A	A	A	B	A	B	A	A	A	A	A	A	B	A	B	A	B	A	B	A	A	A
chr9_58976796	chr9	58976796	B	A	B	B	A	A	A	B	*	A	A	B	A	A	A	A	A	B	B	A	A	B	A	A	A	A	A	A	B	A	B	A	*	A	A	A	A	B	A	B	A	B	A	B	*	A	A
chr9_59045571	chr9	59045571	B	A	B	H	A	A	A	B	A	A	A	B	A	A	A	A	A	B	B	A	A	B	A	A	A	A	A	A	B	A	B	A	A	A	A	A	A	B	A	B	A	B	A	B	A	A	A
chr9_59208030	chr9	59208030	B	A	B	H	A	A	*	B	A	A	A	B	A	A	A	A	A	B	B	A	A	B	A	A	A	A	A	A	B	A	B	A	A	A	A	A	A	B	A	B	A	B	A	B	A	A	A
chr9_59498725	chr9	59498725	B	A	B	B	A	A	A	B	A	A	A	B	A	A	A	A	A	B	B	A	A	B	A	A	A	A	A	A	B	A	B	A	A	A	A	A	A	B	A	B	A	B	A	B	*	A	A
chr9_59516047	chr9	59516047	B	A	B	B	A	A	A	B	A	A	A	B	A	A	A	A	A	B	B	A	A	B	A	A	A	A	A	A	B	A	B	A	A	A	A	A	A	B	A	B	A	B	A	B	A	A	A
chr9_59543657	chr9	59543657	B	A	B	B	A	A	A	B	A	A	A	B	A	A	A	A	A	B	B	A	A	B	A	A	A	A	A	A	B	H	B	*	A	A	A	A	A	B	A	B	A	B	A	B	A	A	A
chr10_386969	chr10	386969	B	B	B	A	B	A	B	A	A	A	A	A	B	A	B	H	A	A	A	B	A	A	B	A	B	A	A	B	B	B	B	A	A	B	A	B	B	A	A	B	A	A	A	A	A	B	B
chr10_578518	chr10	578518	B	B	B	A	B	A	H	A	A	A	A	A	B	A	B	H	A	A	A	B	A	A	B	A	B	A	A	B	B	B	B	B	A	B	A	B	B	A	A	B	A	A	A	A	A	B	B
chr10_661401	chr10	661401	B	B	B	A	B	A	B	A	A	A	A	A	B	A	B	H	A	A	A	B	A	A	B	A	B	A	A	B	B	B	B	B	A	B	A	B	B	A	A	B	A	A	A	A	A	B	B
chr10_672019	chr10	672019	B	B	B	A	B	A	B	A	A	A	A	A	B	A	B	H	A	A	A	B	A	A	B	A	B	A	A	B	B	B	B	B	A	B	A	B	B	A	A	B	A	A	A	A	A	B	B
chr10_964471	chr10	964471	B	B	B	H	B	A	B	A	A	A	A	A	B	A	B	H	A	A	A	B	A	A	B	A	B	A	A	B	B	B	B	*	A	B	A	B	B	A	A	*	A	A	A	A	A	*	B
chr10_1081948	chr10	1081948	B	B	B	H	B	A	B	A	A	A	A	*	B	A	B	B	A	A	A	B	A	A	B	A	B	*	A	B	B	B	B	B	A	B	A	B	B	A	A	*	A	A	A	A	A	B	B
chr10_1131018	chr10	1131018	B	B	B	A	H	A	B	A	A	A	A	A	B	A	B	B	A	A	A	B	A	A	B	A	B	A	A	B	B	B	B	B	A	B	A	B	B	A	A	B	A	A	A	A	A	B	B
chr10_1158955	chr10	1158955	B	B	B	A	B	A	B	A	A	A	A	A	B	A	B	B	A	A	A	B	A	A	B	A	B	A	A	B	B	B	B	B	A	B	A	B	B	A	A	*	A	A	A	A	A	B	B
chr10_1227440	chr10	1227440	B	B	B	A	B	A	B	A	B	A	A	B	B	A	B	B	A	A	A	B	A	B	B	A	B	B	A	B	B	B	B	B	B	B	A	B	B	A	A	A	A	A	A	A	B	B	B
chr10_1467296	chr10	1467296	B	B	B	A	B	A	B	A	A	A	A	A	B	A	B	B	A	A	A	B	A	A	B	A	B	A	A	B	B	B	B	B	A	B	A	B	B	H	A	A	A	B	A	A	A	B	B
chr10_1527119	chr10	1527119	B	B	B	B	B	A	B	A	*	A	A	A	B	H	B	B	A	A	A	B	A	*	B	A	B	A	A	B	B	B	B	B	*	B	A	B	B	A	A	A	A	B	B	A	*	B	B
chr10_1632013	chr10	1632013	B	B	B	B	B	A	B	A	A	A	A	B	B	A	B	B	A	A	A	B	A	A	B	A	B	B	A	B	B	B	B	B	A	B	A	B	B	A	A	A	A	B	B	A	A	B	B
chr10_1933812	chr10	1933812	B	B	B	B	B	A	A	A	B	A	A	B	B	A	B	B	A	A	A	B	A	B	B	A	A	B	A	B	B	B	B	B	B	B	A	B	B	A	A	A	A	B	B	A	B	B	A
chr10_2178615	chr10	2178615	B	B	A	B	B	A	A	A	*	A	A	*	B	H	B	B	A	A	A	B	A	A	B	A	A	*	A	B	B	B	B	B	*	B	A	B	B	A	H	A	A	B	B	A	*	B	A
chr10_2705892	chr10	2705892	B	B	A	B	B	A	A	B	A	A	A	A	B	A	B	B	A	A	A	B	A	A	B	A	A	A	A	B	B	B	B	B	A	B	A	B	B	B	A	A	A	B	B	A	A	A	A
chr10_2800338	chr10	2800338	B	B	A	B	B	A	A	B	*	A	A	*	B	H	B	B	A	A	A	B	A	A	B	A	A	A	A	B	B	B	B	B	*	B	A	B	B	B	A	A	A	B	B	A	A	A	A
chr10_3129844	chr10	3129844	B	B	A	B	B	A	A	B	A	A	A	A	B	A	B	B	A	A	A	B	A	A	B	A	A	A	A	B	B	B	B	B	A	B	A	B	B	B	A	A	A	B	B	A	A	A	B
chr10_3406725	chr10	3406725	B	B	A	B	B	A	A	B	A	A	A	A	B	A	B	B	B	A	A	B	A	A	B	A	A	A	A	B	B	B	B	B	A	B	A	B	B	B	A	A	A	B	B	A	A	A	B
chr10_3429227	chr10	3429227	B	B	A	B	B	A	A	B	A	A	A	A	B	A	B	B	B	A	A	B	A	A	B	A	A	A	A	B	B	B	B	B	A	B	A	B	B	B	A	A	A	B	B	A	A	A	B
chr10_3816881	chr10	3816881	B	B	A	B	B	A	A	B	*	A	A	A	B	A	B	B	B	A	A	B	A	A	B	A	A	A	A	B	A	B	A	B	*	B	A	B	B	B	A	A	A	B	B	A	*	A	B
chr10_4236691	chr10	4236691	B	B	A	B	B	A	A	B	B	A	A	B	B	A	B	B	B	A	A	B	A	B	B	A	A	H	A	B	A	B	A	B	B	B	A	B	B	B	A	A	A	B	B	A	B	A	B
chr10_4653462	chr10	4653462	B	B	A	B	B	A	A	B	B	A	A	B	B	A	B	B	B	A	A	B	A	B	B	A	A	H	A	B	A	B	A	B	B	B	A	B	B	B	A	A	A	B	B	A	B	A	B
chr10_5123393	chr10	5123393	B	B	A	B	B	A	A	B	*	A	A	*	B	H	H	B	B	A	A	B	A	*	B	A	A	A	A	B	A	H	A	B	*	B	A	B	A	H	A	A	A	B	B	A	*	A	B
chr10_5301613	chr10	5301613	B	B	A	B	B	A	A	B	A	A	A	A	B	A	B	B	B	A	A	B	A	A	B	A	A	A	A	B	A	A	A	B	A	B	A	B	A	H	A	A	A	B	B	A	A	A	B
chr10_6259095	chr10	6259095	B	B	A	B	A	A	A	B	A	A	A	B	A	A	B	B	B	A	A	B	A	A	B	B	A	A	A	B	A	A	A	B	A	B	A	B	A	H	A	A	A	B	B	A	A	A	B
chr10_6395442	chr10	6395442	B	B	A	B	B	A	A	B	B	A	A	A	B	A	B	B	B	A	A	B	A	B	B	B	A	A	A	B	A	A	A	B	B	B	A	B	A	H	A	A	A	B	B	A	B	A	B
chr10_6840704	chr10	6840704	B	B	A	A	B	A	B	B	B	A	A	B	B	A	B	B	B	A	A	B	A	B	B	A	A	A	A	B	A	A	A	B	B	B	A	B	A	B	A	A	A	B	B	A	B	A	B
chr10_7287021	chr10	7287021	B	B	A	H	B	A	B	B	*	A	A	B	B	A	B	B	B	A	A	B	A	*	B	A	A	A	A	B	A	A	A	B	*	B	A	B	A	B	A	A	A	B	B	A	*	A	B
chr10_7422327	chr10	7422327	B	B	A	A	B	A	B	B	*	A	A	*	B	A	B	B	B	A	A	B	A	*	B	A	A	A	A	B	A	A	A	B	*	B	A	B	A	B	A	A	A	B	B	A	*	A	B
chr10_7515023	chr10	7515023	B	B	A	A	B	A	B	B	A	A	A	A	B	A	B	B	B	A	A	B	A	A	B	A	A	A	A	B	A	A	A	B	A	B	A	B	A	B	A	A	A	B	B	A	A	A	B
chr10_7766709	chr10	7766709	B	B	A	A	B	A	B	B	A	A	A	A	B	H	B	B	B	A	A	B	A	A	B	A	A	A	A	B	A	A	A	B	A	B	A	B	A	B	A	A	A	B	B	B	A	A	B
chr10_8482237	chr10	8482237	B	B	A	H	B	A	B	B	A	B	A	B	B	A	*	B	B	A	A	B	A	A	B	A	B	A	A	B	A	A	A	B	A	B	A	B	A	B	A	A	A	B	B	B	A	A	B
chr10_9359175	chr10	9359175	B	B	A	A	B	A	B	B	A	B	A	B	B	A	B	B	B	A	A	B	A	A	B	A	B	A	A	A	A	A	A	A	A	B	B	B	A	H	A	A	A	B	B	B	A	A	B
chr10_9939048	chr10	9939048	B	B	A	A	B	A	B	B	A	B	A	B	B	A	B	B	B	A	A	B	A	A	B	A	B	A	A	A	A	A	A	A	A	B	B	B	A	H	A	A	A	B	B	B	A	A	B
chr10_10372018	chr10	10372018	B	B	A	A	B	B	B	A	*	B	A	*	B	A	B	B	B	A	A	B	A	*	B	A	B	A	A	A	A	A	A	A	*	B	A	B	A	H	A	A	A	B	B	B	*	A	B
chr10_10932034	chr10	10932034	A	B	A	A	B	B	B	A	B	B	A	B	B	H	B	B	B	A	A	B	A	B	B	A	B	A	B	A	A	A	A	A	B	A	A	B	A	H	A	A	A	B	B	B	B	A	B
chr10_11278263	chr10	11278263	A	B	A	A	B	B	B	A	*	B	A	*	B	A	B	B	B	A	A	B	H	*	B	A	B	A	B	A	A	A	A	A	*	A	A	B	A	H	A	A	A	B	B	B	*	A	B
chr10_11514001	chr10	11514001	A	B	A	H	B	B	B	A	A	B	A	A	B	A	B	B	B	A	A	B	H	A	B	A	B	A	B	A	A	A	A	A	A	A	A	B	A	H	A	A	A	B	B	B	A	A	B
chr10_20158814	chr10	20158814	A	B	A	H	B	B	B	B	B	B	A	A	B	A	B	B	A	B	A	A	A	B	B	A	B	A	B	A	A	A	A	A	B	A	A	B	A	H	A	A	A	B	B	A	B	A	A
chr10_43902820	chr10	43902820	A	B	A	A	B	B	B	B	A	B	A	*	B	A	B	B	A	B	A	A	A	A	B	A	B	A	B	A	H	A	B	A	A	A	A	B	A	H	A	A	A	B	B	A	A	A	A
chr10_44782293	chr10	44782293	A	B	A	A	B	B	B	B	A	B	A	A	B	A	B	B	A	B	A	A	A	A	B	A	B	*	B	A	H	A	B	A	A	A	A	B	A	H	A	A	A	B	B	A	A	A	A
chr10_46277423	chr10	46277423	A	B	A	A	B	B	B	B	A	B	A	A	B	A	B	B	A	B	A	A	A	A	B	A	B	*	B	A	H	A	B	A	A	A	A	B	A	A	A	A	A	B	B	A	A	A	A
chr10_47851365	chr10	47851365	A	B	A	H	B	B	B	B	A	B	A	A	B	A	B	B	A	B	A	A	A	A	B	A	B	B	B	A	H	A	B	A	A	A	A	B	A	H	A	A	A	B	B	A	A	A	A
chr10_48084903	chr10	48084903	A	B	A	A	H	B	B	B	A	B	A	B	B	A	B	B	B	B	A	A	A	A	B	A	B	A	B	A	H	A	B	A	A	A	A	B	A	H	A	A	A	B	B	A	A	A	A
chr10_48643124	chr10	48643124	A	B	A	A	B	B	B	B	B	B	A	*	B	A	B	B	B	B	A	A	A	B	B	A	B	B	B	A	H	A	B	A	B	A	A	B	A	A	A	A	A	B	B	A	B	A	H
chr10_48781683	chr10	48781683	B	B	A	H	B	B	B	B	*	B	A	B	B	A	B	B	B	B	A	A	B	*	B	A	B	B	B	A	H	A	B	A	*	A	A	B	A	B	A	A	A	B	B	A	*	A	A
chr10_49561463	chr10	49561463	B	B	A	A	B	B	B	A	*	B	A	*	B	A	B	B	B	B	A	A	B	*	B	A	B	B	B	A	H	A	B	A	*	A	A	B	A	B	A	A	A	B	B	A	*	A	A
chr10_49648988	chr10	49648988	B	B	A	H	B	B	B	A	B	B	A	*	B	A	B	B	B	B	A	A	B	B	B	A	B	*	B	A	H	A	B	A	B	A	A	B	A	B	A	A	A	B	B	A	B	A	A
chr10_49672819	chr10	49672819	B	B	A	A	B	B	B	A	*	B	A	A	B	A	B	B	B	B	A	A	B	*	B	A	B	A	B	A	B	A	B	A	*	A	B	B	A	B	A	A	A	B	B	A	*	A	A
chr10_50662285	chr10	50662285	B	B	A	A	B	B	B	A	A	B	A	A	B	A	B	B	B	B	A	A	B	A	B	A	B	B	B	A	B	H	B	A	A	A	B	B	A	A	A	A	A	B	B	A	A	A	A
chr10_50306985	chr10	50306985	B	B	A	H	B	B	B	A	A	B	A	A	B	A	B	B	B	B	A	A	B	A	B	A	B	A	B	A	B	A	B	A	A	A	B	B	A	A	A	A	A	B	B	A	A	A	A
chr10_51246570	chr10	51246570	B	B	A	A	B	B	B	A	A	B	A	A	B	H	B	B	B	B	A	A	B	A	B	A	B	B	B	A	B	A	B	A	A	A	B	B	A	A	A	A	A	B	B	B	A	A	A
chr10_51474072	chr10	51474072	B	B	A	A	B	B	B	A	B	B	A	B	B	A	B	B	B	B	A	B	B	B	B	A	B	B	B	A	B	A	B	A	B	A	B	B	A	A	A	A	A	B	B	B	B	A	A
chr10_52120331	chr10	52120331	B	B	B	H	B	B	B	B	A	B	A	A	B	H	B	B	B	A	A	B	B	A	A	A	B	B	B	A	B	A	B	A	A	B	B	B	B	A	A	A	A	B	B	B	A	A	A
chr10_52222389	chr10	52222389	B	B	B	H	B	B	B	B	B	B	A	A	B	A	B	B	B	A	A	B	B	B	A	A	B	B	B	A	B	A	B	A	B	B	B	B	B	A	B	A	A	B	B	B	B	A	A
chr10_52600683	chr10	52600683	B	B	B	A	B	B	B	B	B	B	A	A	B	H	B	B	B	A	A	B	B	B	A	A	B	*	B	A	B	A	B	A	B	B	B	B	B	A	B	A	A	B	B	B	B	A	A
chr10_53231574	chr10	53231574	B	A	A	A	B	B	B	B	*	B	A	A	B	A	B	B	B	B	A	B	B	*	A	A	B	B	B	A	B	A	B	A	*	B	B	B	B	A	B	A	A	B	B	B	*	A	A
chr10_53287298	chr10	53287298	B	A	*	H	B	B	B	B	A	B	*	A	B	H	B	B	B	B	A	B	B	*	A	A	B	B	B	A	B	H	B	A	A	B	B	B	B	A	B	A	A	B	B	B	A	A	A
chr10_53579630	chr10	53579630	B	A	A	A	B	B	B	B	A	B	A	A	B	H	B	B	B	B	A	B	B	A	A	A	A	B	B	A	B	H	B	A	A	A	B	B	B	A	B	A	*	B	B	B	A	A	A
chr10_53773275	chr10	53773275	B	A	A	A	B	B	B	B	*	B	A	A	B	H	B	B	B	B	A	A	A	*	A	A	A	*	B	A	B	A	B	A	*	A	B	B	B	A	B	A	A	B	B	B	*	A	A
chr10_54095965	chr10	54095965	B	A	A	H	B	B	B	A	B	B	A	A	B	B	B	B	B	B	A	A	A	B	A	A	A	B	B	A	H	H	B	A	B	A	B	B	B	A	B	A	A	B	B	B	B	A	A
chr10_54969836	chr10	54969836	B	A	A	H	B	B	B	B	B	B	B	A	B	B	B	B	B	B	A	A	A	B	A	A	A	B	B	A	B	A	B	A	B	A	B	B	B	A	A	A	A	B	B	B	B	A	A
chr10_55184965	chr10	55184965	B	A	A	A	B	B	B	B	B	B	B	A	B	B	B	B	B	B	A	A	A	B	A	A	A	A	B	A	B	A	B	A	B	A	B	B	B	A	*	A	A	B	B	B	B	B	A
chr10_55247362	chr10	55247362	B	A	A	A	B	B	B	B	A	B	B	A	B	B	B	B	B	B	A	A	A	A	A	A	A	A	B	A	B	A	B	A	A	A	B	B	B	A	A	A	A	B	B	B	A	B	A
chr10_55363444	chr10	55363444	B	A	A	H	B	B	B	B	B	B	B	A	B	B	B	B	B	B	A	A	A	B	A	A	A	A	B	A	B	H	B	A	B	A	B	B	B	A	B	A	A	B	A	B	B	B	A
chr10_55398648	chr10	55398648	B	A	A	A	B	*	B	B	B	B	B	A	B	B	B	B	B	B	A	A	A	*	A	A	A	A	B	A	B	A	*	A	B	A	B	B	B	A	B	A	A	B	A	B	B	B	A
chr10_55552448	chr10	55552448	B	A	A	B	B	B	B	B	B	B	B	A	B	B	B	B	B	B	A	A	A	B	A	A	A	A	B	A	B	A	B	A	B	A	B	B	B	A	B	A	A	B	A	B	B	B	A
chr10_55603595	chr10	55603595	B	A	A	B	B	B	B	B	H	B	B	A	B	B	B	B	B	B	A	A	A	A	A	A	A	A	B	A	B	A	B	A	A	A	B	B	B	A	B	A	A	B	A	B	A	B	A
chr10_56061985	chr10	56061985	B	A	A	A	H	B	B	B	A	B	B	A	B	B	B	B	B	B	*	A	A	A	A	A	A	B	B	A	*	*	B	*	A	A	B	B	B	A	B	A	A	B	A	B	A	B	A
chr10_56436901	chr10	56436901	B	A	A	A	B	B	B	B	A	B	B	H	B	B	B	B	B	B	A	A	A	A	A	A	A	H	B	A	B	A	B	A	A	A	B	B	A	A	A	A	A	B	A	B	A	B	A
chr10_56486988	chr10	56486988	B	A	A	A	B	B	B	B	A	B	B	A	B	B	B	B	B	B	A	A	A	A	A	A	A	H	B	A	B	A	B	A	A	A	B	B	A	A	*	A	A	B	A	B	A	B	A
chr10_56727252	chr10	56727252	B	A	A	A	B	B	B	B	*	B	B	A	B	B	B	B	B	B	A	B	A	*	A	A	A	H	B	A	B	A	B	A	*	A	B	B	A	A	B	A	A	B	A	B	*	B	A
chr10_56748354	chr10	56748354	B	A	A	A	B	B	B	B	*	B	B	A	B	B	B	B	*	B	A	B	A	*	A	A	A	H	B	A	B	A	B	A	*	A	B	B	A	A	A	A	A	B	A	B	*	B	A
chr10_56823672	chr10	56823672	B	A	A	A	A	B	B	B	A	B	B	A	A	B	B	H	B	B	A	B	A	A	A	A	A	H	B	A	B	A	B	A	A	A	B	B	A	A	B	A	A	B	A	B	A	B	A
chr10_56871290	chr10	56871290	B	A	A	A	A	B	B	B	B	B	B	*	A	B	B	H	B	*	A	B	A	B	A	A	A	A	B	A	*	A	B	A	B	A	B	B	A	A	*	A	A	*	A	B	B	B	A
chr10_57423581	chr10	57423581	B	A	A	A	A	A	B	B	*	B	B	A	A	B	B	B	B	B	A	B	A	*	A	A	A	H	B	B	B	A	B	A	B	A	B	A	A	B	*	A	A	B	A	B	*	B	A
chr10_57617558	chr10	57617558	B	A	A	A	A	A	B	B	A	B	B	A	A	B	B	B	B	B	A	B	A	A	A	A	A	H	B	B	B	H	B	A	B	A	B	A	A	B	A	A	A	B	A	B	A	A	A
chr10_57659512	chr10	57659512	B	A	A	A	A	*	B	B	*	B	B	A	A	B	B	H	B	B	A	B	A	*	A	A	A	H	B	B	B	*	B	*	B	A	B	A	A	*	A	A	A	B	A	B	*	A	A
chr10_57690269	chr10	57690269	B	A	A	A	A	A	B	B	A	B	B	A	A	B	B	H	B	B	A	B	A	A	A	A	A	A	B	B	B	A	B	A	B	A	B	A	A	B	B	A	A	B	A	B	A	A	A
chr10_57773748	chr10	57773748	B	A	A	A	A	A	B	B	*	B	B	A	A	B	B	H	B	B	A	B	A	*	A	A	A	H	B	B	B	A	B	A	B	A	B	A	B	B	*	A	A	B	A	B	*	A	A
chr10_58025473	chr10	58025473	B	A	A	A	A	A	B	B	*	B	B	A	A	B	B	B	B	B	A	B	A	*	A	A	A	H	B	B	B	A	B	A	B	A	B	A	B	B	*	A	A	B	A	B	*	A	A
chr10_58356462	chr10	58356462	B	A	A	A	A	A	B	B	*	B	B	A	A	B	B	B	B	B	A	B	A	*	A	A	A	H	B	B	B	A	B	A	B	A	B	A	B	B	A	A	A	B	A	B	*	A	A
chr10_58373800	chr10	58373800	B	B	A	A	A	A	B	B	A	B	B	A	A	B	B	H	B	B	A	B	A	A	A	A	A	H	B	B	B	A	B	A	B	A	B	A	B	B	B	A	A	B	A	B	A	A	A
chr10_58600423	chr10	58600423	B	A	A	A	A	A	B	B	B	B	B	A	A	B	B	B	B	B	A	B	A	B	A	A	B	B	B	B	B	A	B	A	B	A	B	A	B	B	B	A	A	B	A	B	B	A	A
chr10_58987976	chr10	58987976	B	A	A	A	A	A	B	B	B	B	B	A	A	B	B	H	B	B	A	B	A	B	A	A	B	B	B	B	B	A	B	A	B	A	B	A	B	B	B	A	A	B	A	B	B	A	A
chr10_59020247	chr10	59020247	B	A	A	A	A	A	B	B	B	B	B	A	A	B	B	H	B	B	A	B	A	B	A	A	B	B	B	B	B	A	B	A	B	A	B	A	B	B	A	A	A	B	A	B	B	*	A
chr10_59345589	chr10	59345589	B	A	A	A	A	H	B	B	A	B	B	A	A	B	B	H	B	B	A	B	A	A	A	A	B	B	B	B	B	A	B	A	B	A	B	A	B	B	A	A	A	B	A	B	A	A	A
chr10_59159585	chr10	59159585	B	A	B	A	A	A	B	B	B	B	B	A	A	B	B	H	B	B	A	B	A	B	A	A	B	B	B	B	B	A	B	A	B	A	B	A	B	B	A	A	A	B	A	B	B	A	A
chr10_60223764	chr10	60223764	B	A	B	A	A	A	A	B	B	B	B	A	A	B	B	B	B	B	A	B	A	B	A	A	B	B	B	B	B	A	B	A	B	A	B	A	B	B	B	A	A	B	A	B	B	A	A
chr10_60236144	chr10	60236144	B	A	B	A	A	A	A	B	A	B	B	A	A	B	B	H	B	B	A	B	A	B	A	A	B	B	B	B	B	A	B	A	B	A	B	A	B	B	B	A	A	B	A	B	A	A	A
chr10_60255444	chr10	60255444	B	H	B	A	A	A	A	B	A	B	B	A	A	B	B	H	B	B	A	B	A	B	A	A	B	B	B	B	B	A	B	A	B	A	B	A	B	B	*	A	A	B	A	B	A	A	A
Key
A	Polymorphism from female parent
B	Polymorphism from male parent
H	Polymorphism from both parents
*	Missing data
[truncated: 66 more columns]
